# Supplementary material for: Chloroplast Genome of Rambutan and Comparative Analyses in Sapindaceae
Source: Research Square preprint supplement (doi:10.21203/rs.3.rs-128918/v1), 2020-12-28
Supplement: Supplementary file 1 [file d265c7baa3730d18329d48bd.xlsx]

## Sheet: NL_PT
Table S9 Ka/Ks ratio between pairwise of species protein coding sequences in nine Sapindaceae species.
Sequence	Method	Ka	Ks	Ka/Ks	P-Value(Fisher)	Length	S-Sites	N-Sites	Fold-Sites(0:2:4)	Substitutions	S-Substitutions	N-Substitutions	Fold-S-Substitutions(0:2:4)	Fold-N-Substitutions(0:2:4)	Divergence-Time	Substitution-Rate-Ratio(rTC:rAG:rTA:rCG:rTG:rCA/rCA)	GC(1:2:3)	ML-Score	AICc	Akaike-Weight	Model
accDNL-accDPT	NG	0.00337749	0.00667369	0.50609	0.350231	1488	301.019	1186.98	NA	6	2	4	NA	NA	0.0040443	1:1:1:1:1:1	0.347782(0.394153:0.370968:0.278226)	NA	NA	NA	NA
atpANL-atpAPT	NG	0.00348846	0.0190733	0.182898	0.00642198	1521	371.692	1149.31	NA	11	7	4	NA	NA	0.00729697	1:1:1:1:1:1	0.407627(0.54931:0.39645:0.27712)	NA	NA	NA	NA
atpBNL-atpBPT	NG	0.00179014	0.0107308	0.166822	0.0377278	1494	375.432	1118.57	NA	6	4	2	NA	NA	0.00403686	1:1:1:1:1:1	0.441098(0.572289:0.416667:0.334337)	NA	NA	NA	NA
atpENL-atpEPT	NG	NA	0.0322179	0	NA	399	95.1304	303.87	NA	3	3	NA	NA	NA	0.00768145	1:1:1:1:1:1	0.414787(0.511278:0.413534:0.319549)	NA	NA	NA	NA
atpFNL-atpFPT	NG	0.00709225	0.00791566	0.895977	0.647045	552	127	425	NA	4	1	3	NA	NA	0.00728169	1:1:1:1:1:1	0.396739(0.491848:0.339674:0.358696)	NA	NA	NA	NA
atpHNL-atpHPT	NG	NA	0.0302827	0	NA	243	67.3866	175.613	NA	2	2	NA	NA	NA	0.00839773	1:1:1:1:1:1	0.481481(0.641975:0.493827:0.308642)	NA	NA	NA	NA
atpINL-atpIPT	NG	0.00355961	0.017065	0.208591	0.0917402	741	177.806	563.194	NA	5	3	2	NA	NA	0.00680028	1:1:1:1:1:1	0.374494(0.489879:0.370445:0.263158)	NA	NA	NA	NA
ccsANL-ccsAPT	NG	0.00266076	0.0140191	0.189796	0.0759826	969	216.001	752.999	NA	5	3	2	NA	NA	0.00519265	1:1:1:1:1:1	0.339009(0.359133:0.376161:0.281734)	NA	NA	NA	NA
cemANL-cemAPT	NG	0.00365281	0.0276896	0.13192	0.0201469	696	147.142	548.858	NA	6	4	2	NA	NA	0.00873444	1:1:1:1:1:1	0.335489(0.396552:0.278017:0.331897)	NA	NA	NA	NA
clpPNL-clpPPT	NG	0.00225228	0.0284383	0.079199	0.013021	588	143.339	444.661	NA	5	4	1	NA	NA	0.00863574	1:1:1:1:1:1	0.42602(0.563776:0.382653:0.331633)	NA	NA	NA	NA
matKNL-matKPT	NG	0.00844125	0.00915589	0.921948	0.958831	1521	329.662	1191.34	NA	13	3	10	NA	NA	0.00859614	1:1:1:1:1:1	0.348784(0.418146:0.316568:0.311637)	NA	NA	NA	NA
ndhANL-ndhAPT	NG	0.00121972	0.00373408	0.326645	0.371847	1089	268.471	820.529	NA	2	1	1	NA	NA	0.00183958	1:1:1:1:1:1	0.351699(0.435262:0.396694:0.22314)	NA	NA	NA	NA
ndhBNL-ndhBPT	NG	0.00216071	0.00415161	0.520451	0.238641	1521	362.306	1158.69	NA	4	1.5	2.5	NA	NA	0.00263495	1:1:1:1:1:1	0.376726(0.418146:0.386588:0.325444)	NA	NA	NA	NA
ndhCNL-ndhCPT	NG	NA	NA	NA	NA	360	82.9446	277.055	NA	0	NA	NA	NA	NA	NA	1:1:1:1:1:1	0.352778(0.466667:0.333333:0.258333)	NA	NA	NA	NA
ndhDNL-ndhDPT	NG	0.00687635	0.0310852	0.22121	0.00129193	1530	361.25	1168.75	NA	19	11	8	NA	NA	0.0125923	1:1:1:1:1:1	0.366993(0.413725:0.373529:0.313725)	NA	NA	NA	NA
ndhENL-ndhEPT	NG	0.00438765	0.0141339	0.310434	0.363997	300	71.4205	228.58	NA	2	1	1	NA	NA	0.00670793	1:1:1:1:1:1	0.34(0.405:0.36:0.255)	NA	NA	NA	NA
ndhFNL-ndhFPT	NG	0.00836702	0.0300462	0.278472	0.000397499	2235	492.321	1742.68	NA	29	14.5	14.5	NA	NA	0.0131425	1:1:1:1:1:1	0.325503(0.374497:0.351678:0.250336)	NA	NA	NA	NA
ndhGNL-ndhGPT	NG	0.00248069	0.0155182	0.159857	0.134613	534	130.219	403.781	NA	3	2	1	NA	NA	0.00565996	1:1:1:1:1:1	0.349251(0.435393:0.359551:0.252809)	NA	NA	NA	NA
ndhHNL-ndhHPT	NG	0.00327414	0.0233729	0.140083	0.00507555	1179	260.729	918.271	NA	9	6	3	NA	NA	0.00771886	1:1:1:1:1:1	0.388889(0.522901:0.36514:0.278626)	NA	NA	NA	NA
ndhINL-ndhIPT	NG	0.00256537	0.0276466	0.0927915	0.0329623	501	110.525	390.475	NA	4	3	1	NA	NA	0.00809849	1:1:1:1:1:1	0.371257(0.44012:0.377246:0.296407)	NA	NA	NA	NA
ndhJNL-ndhJPT	NG	NA	NA	NA	NA	474	106.493	367.507	NA	0	NA	NA	NA	NA	NA	1:1:1:1:1:1	0.407173(0.537975:0.367089:0.316456)	NA	NA	NA	NA
ndhKNL-ndhKPT	NG	NA	0.00612564	0	NA	687	163.916	523.084	NA	1	1	NA	NA	NA	0.00146156	1:1:1:1:1:1	0.389374(0.449782:0.432314:0.286026)	NA	NA	NA	NA
petANL-petAPT	NG	0.00136874	0.0087951	0.155625	0.12957	960	228.735	731.265	NA	3	2	1	NA	NA	0.00313819	1:1:1:1:1:1	0.404687(0.53125:0.36875:0.314063)	NA	NA	NA	NA
petBNL-petBPT	NG	NA	0.00643718	0	NA	645	156.015	488.985	NA	1	1	NA	NA	NA	0.00155705	1:1:1:1:1:1	0.408527(0.493023:0.418605:0.313953)	NA	NA	NA	NA
petDNL-petDPT	NG	NA	NA	NA	NA	480	116.932	363.068	NA	0	NA	NA	NA	NA	NA	1:1:1:1:1:1	0.391667(0.50625:0.3875:0.28125)	NA	NA	NA	NA
petGNL-petGPT	NG	NA	NA	NA	NA	111	27.4074	83.5926	NA	0	NA	NA	NA	NA	NA	1:1:1:1:1:1	0.369369(0.513514:0.297297:0.297297)	NA	NA	NA	NA
petLNL-petLPT	NG	NA	NA	NA	NA	93	24.3491	68.6509	NA	0	NA	NA	NA	NA	NA	1:1:1:1:1:1	0.354839(0.354839:0.451613:0.258065)	NA	NA	NA	NA
petNNL-petNPT	NG	NA	NA	NA	NA	87	20.6498	66.3502	NA	0	NA	NA	NA	NA	NA	1:1:1:1:1:1	0.436782(0.482759:0.448276:0.37931)	NA	NA	NA	NA
psaANL-psaAPT	NG	0.000580373	0.0114878	0.050521	0.00086167	2250	526.305	1723.7	NA	7	6	1	NA	NA	0.00313176	1:1:1:1:1:1	0.432889(0.526667:0.436:0.336)	NA	NA	NA	NA
psaBNL-psaBPT	NG	0.00235658	0.0120495	0.195576	0.0122592	2202	501.958	1700.04	NA	10	6	4	NA	NA	0.00456613	1:1:1:1:1:1	0.415304(0.490463:0.431199:0.324251)	NA	NA	NA	NA
psaCNL-psaCPT	NG	NA	0.0369217	0	NA	243	55.5129	187.487	NA	2	2	NA	NA	NA	0.0084347	1:1:1:1:1:1	0.407407(0.45679:0.530864:0.234568)	NA	NA	NA	NA
psaINL-psaIPT	NG	0.0118787	NA	NA	NA	111	26.1474	84.8526	NA	1	NA	1	NA	NA	0.00908054	1:1:1:1:1:1	0.351351(0.459459:0.27027:0.324324)	NA	NA	NA	NA
psaJNL-psaJPT	NG	NA	0.101931	0	NA	132	31.4769	100.523	NA	3	3	NA	NA	NA	0.0243067	1:1:1:1:1:1	0.390152(0.409091:0.409091:0.352273)	NA	NA	NA	NA
psbANL-psbAPT	NG	0.00123399	0.0204412	0.0603677	0.00314924	1059	247.953	811.047	NA	6	5	1	NA	NA	0.00573113	1:1:1:1:1:1	0.426818(0.505666:0.436261:0.338527)	NA	NA	NA	NA
psbBNL-psbBPT	NG	0.000860829	0.0167763	0.0513122	0.000927346	1524	361.662	1162.34	NA	7	6	1	NA	NA	0.00463775	1:1:1:1:1:1	0.434711(0.543307:0.459646:0.301181)	NA	NA	NA	NA
psbCNL-psbCPT	NG	NA	0.00579842	0	NA	1419	346.257	1072.74	NA	2	2	NA	NA	NA	0.0014149	1:1:1:1:1:1	0.444679(0.539112:0.458774:0.336152)	NA	NA	NA	NA
psbDNL-psbDPT	NG	0.00370881	0.0040413	0.917726	0.653877	1059	248.112	810.888	NA	4	1	3	NA	NA	0.0037867	1:1:1:1:1:1	0.427762(0.525496:0.433428:0.324363)	NA	NA	NA	NA
psbENL-psbEPT	NG	NA	NA	NA	NA	249	57.3559	191.644	NA	0	NA	NA	NA	NA	NA	1:1:1:1:1:1	0.413655(0.433735:0.481928:0.325301)	NA	NA	NA	NA
psbFNL-psbFPT	NG	NA	NA	NA	NA	117	30.1053	86.8947	NA	0	NA	NA	NA	NA	NA	1:1:1:1:1:1	0.418803(0.487179:0.435897:0.333333)	NA	NA	NA	NA
psbHNL-psbHPT	NG	NA	NA	NA	NA	219	56.8031	162.197	NA	0	NA	NA	NA	NA	NA	1:1:1:1:1:1	0.420091(0.479452:0.479452:0.30137)	NA	NA	NA	NA
psbINL-psbIPT	NG	NA	NA	NA	NA	108	26.8302	81.1698	NA	0	NA	NA	NA	NA	NA	1:1:1:1:1:1	0.398148(0.527778:0.305556:0.361111)	NA	NA	NA	NA
psbJNL-psbJPT	NG	0.0114447	NA	NA	NA	120	31.9547	88.0453	NA	1	NA	1	NA	NA	0.00839708	1:1:1:1:1:1	0.404167(0.3875:0.5:0.325)	NA	NA	NA	NA
psbKNL-psbKPT	NG	NA	NA	NA	NA	183	40.5531	142.447	NA	0	NA	NA	NA	NA	NA	1:1:1:1:1:1	0.338798(0.409836:0.327869:0.278689)	NA	NA	NA	NA
psbLNL-psbLPT	NG	NA	0.0435758	0	NA	114	23.6216	90.3784	NA	1	1	NA	NA	NA	0.00902923	1:1:1:1:1:1	0.337719(0.368421:0.263158:0.381579)	NA	NA	NA	NA
psbMNL-psbMPT	NG	NA	0.0421483	0	NA	102	24.3987	77.6013	NA	1	1	NA	NA	NA	0.010082	1:1:1:1:1:1	0.318627(0.455882:0.294118:0.205882)	NA	NA	NA	NA
psbNNL-psbNPT	NG	NA	NA	NA	NA	129	31.9069	97.0931	NA	0	NA	NA	NA	NA	NA	1:1:1:1:1:1	0.434109(0.581395:0.418605:0.302326)	NA	NA	NA	NA
psbTNL-psbTPT	NG	NA	0.0429769	0	NA	105	23.9414	81.0586	NA	1	1	NA	NA	NA	0.00979928	1:1:1:1:1:1	0.357143(0.4:0.314286:0.357143)	NA	NA	NA	NA
psbZNL-psbZPT	NG	NA	0.021543	0	NA	186	47.0886	138.911	NA	1	1	NA	NA	NA	0.00545393	1:1:1:1:1:1	0.357527(0.387097:0.419355:0.266129)	NA	NA	NA	NA
rbcLNL-rbcLPT	NG	NA	0.0207544	0	NA	1425	341.965	1083.03	NA	7	7	NA	NA	NA	0.00498056	1:1:1:1:1:1	0.44807(0.581053:0.437895:0.325263)	NA	NA	NA	NA
rpl14NL-rpl14PT	NG	NA	NA	NA	NA	366	88.2383	277.762	NA	0	NA	NA	NA	NA	NA	1:1:1:1:1:1	0.404372(0.540984:0.385246:0.286885)	NA	NA	NA	NA
rpl16NL-rpl16PT	NG	0.00329801	0.020044	0.164538	0.139971	405	101.12	303.88	NA	3	2	1	NA	NA	0.00747912	1:1:1:1:1:1	0.428395(0.511111:0.52963:0.244444)	NA	NA	NA	NA
rpl20NL-rpl20PT	NG	0.00341557	0.0338825	0.100806	0.0393822	384	90.5563	293.444	NA	4	3	1	NA	NA	0.0106004	1:1:1:1:1:1	0.375(0.390625:0.457031:0.277344)	NA	NA	NA	NA
rpl22NL-rpl22PT	NG	NA	NA	NA	NA	486	105.637	380.363	NA	0	NA	NA	NA	NA	NA	1:1:1:1:1:1	0.360082(0.407407:0.376543:0.296296)	NA	NA	NA	NA
rpl23NL-rpl23PT	NG	NA	NA	NA	NA	279	63.0783	215.922	NA	0	NA	NA	NA	NA	NA	1:1:1:1:1:1	0.383513(0.430108:0.408602:0.311828)	NA	NA	NA	NA
rpl2NL-rpl2PT	NG	NA	NA	NA	NA	822	202.647	619.353	NA	0	NA	NA	NA	NA	NA	1:1:1:1:1:1	0.441606(0.514599:0.489051:0.321168)	NA	NA	NA	NA
rpl32NL-rpl32PT	NG	NA	0.0583915	0	NA	159	35.6022	123.398	NA	2	2	NA	NA	NA	0.0130746	1:1:1:1:1:1	0.333333(0.283019:0.471698:0.245283)	NA	NA	NA	NA
rpl33NL-rpl33PT	NG	0.224788	0.236015	0.952433	0.833206	204	45.6821	158.318	NA	40	9.25	30.75	NA	NA	0.227302	1:1:1:1:1:1	0.370098(0.389706:0.404412:0.316176)	NA	NA	NA	NA
rpl36NL-rpl36PT	NG	NA	0.0379144	0	NA	111	27.0475	83.9525	NA	1	1	NA	NA	NA	0.00923864	1:1:1:1:1:1	0.40991(0.459459:0.486486:0.283784)	NA	NA	NA	NA
rpoANL-rpoAPT	NG	0.0172248	0.0139166	1.23772	0.982533	981	217.577	763.423	NA	16	3	13	NA	NA	0.0164911	1:1:1:1:1:1	0.363914(0.474006:0.324159:0.293578)	NA	NA	NA	NA
rpoBNL-rpoBPT	NG	0.00284993	0.00940284	0.303093	0.0264965	3210	749.133	2460.87	NA	14	7	7	NA	NA	0.00437921	1:1:1:1:1:1	0.39891(0.506542:0.379439:0.310748)	NA	NA	NA	NA
rpoC1NL-rpoC1PT	NG	0.00191572	0.0193139	0.0991889	0.000198238	2040	472.012	1567.99	NA	12	9	3	NA	NA	0.00594128	1:1:1:1:1:1	0.387745(0.505147:0.380882:0.277206)	NA	NA	NA	NA
rpoC2NL-rpoC2PT	NG	0.00690543	0.0103549	0.666876	0.205878	4173	972.41	3200.59	NA	32	10	22	NA	NA	0.00770923	1:1:1:1:1:1	0.38833(0.470165:0.378864:0.31596)	NA	NA	NA	NA
rps11NL-rps11PT	NG	0.00658701	0.0280309	0.234991	0.115638	414	109.037	304.963	NA	5	3	2	NA	NA	0.0122348	1:1:1:1:1:1	0.472222(0.543478:0.59058:0.282609)	NA	NA	NA	NA
rps12NL-rps12PT	NG	NA	NA	NA	NA	369	96.3211	272.679	NA	0	NA	NA	NA	NA	NA	1:1:1:1:1:1	0.447154(0.528455:0.495935:0.317073)	NA	NA	NA	NA
rps14NL-rps14PT	NG	0.00865251	NA	NA	NA	300	67.5174	232.483	NA	2	NA	2	NA	NA	0.0067052	1:1:1:1:1:1	0.42(0.47:0.45:0.34)	NA	NA	NA	NA
rps15NL-rps15PT	NG	0.0138148	0.0341927	0.404027	0.291643	279	59.8354	219.165	NA	5	2	3	NA	NA	0.0181851	1:1:1:1:1:1	0.324373(0.397849:0.274194:0.301075)	NA	NA	NA	NA
rps16NL-rps16PT	NG	NA	0.0156177	0	NA	264	64.6991	199.301	NA	1	1	NA	NA	NA	0.00382745	1:1:1:1:1:1	0.373106(0.534091:0.363636:0.221591)	NA	NA	NA	NA
rps18NL-rps18PT	NG	NA	NA	NA	NA	333	75.0374	257.963	NA	0	NA	NA	NA	NA	NA	1:1:1:1:1:1	0.336336(0.342342:0.405405:0.261261)	NA	NA	NA	NA
rps19NL-rps19PT	NG	NA	NA	NA	NA	276	63.9554	212.045	NA	0	NA	NA	NA	NA	NA	1:1:1:1:1:1	0.358696(0.434783:0.402174:0.23913)	NA	NA	NA	NA
rps2NL-rps2PT	NG	0.00921038	0.0124644	0.738935	0.500748	708	161.794	546.206	NA	7	2	5	NA	NA	0.009954	1:1:1:1:1:1	0.386299(0.432203:0.419492:0.307203)	NA	NA	NA	NA
rps3NL-rps3PT	NG	NA	NA	NA	NA	660	149.921	510.079	NA	0	NA	NA	NA	NA	NA	1:1:1:1:1:1	0.345455(0.481818:0.336364:0.218182)	NA	NA	NA	NA
rps4NL-rps4PT	NG	0.00218037	0.0140491	0.155196	0.129505	603	143.695	459.305	NA	3	2	1	NA	NA	0.0050087	1:1:1:1:1:1	0.382255(0.527363:0.370647:0.248756)	NA	NA	NA	NA
rps7NL-rps7PT	NG	NA	NA	NA	NA	465	114.435	350.565	NA	0	NA	NA	NA	NA	NA	1:1:1:1:1:1	0.412903(0.535484:0.451613:0.251613)	NA	NA	NA	NA
rps8NL-rps8PT	NG	0.00331745	0.0100778	0.329183	0.374425	402	99.8961	302.104	NA	2	1	1	NA	NA	0.00499738	1:1:1:1:1:1	0.373134(0.436567:0.410448:0.272388)	NA	NA	NA	NA
ycf1NL-ycf1PT	NG	0.0099998	0.0157095	0.636544	0.114828	5688	1157.84	4530.16	NA	63	18	45	NA	NA	0.0111621	1:1:1:1:1:1	0.305468(0.356804:0.290612:0.268987)	NA	NA	NA	NA
ycf2NL-ycf2PT	NG	0.00130637	0.00134441	0.971709	0.889922	6852	1488.98	5363.02	NA	9	2	7	NA	NA	0.00131464	1:1:1:1:1:1	0.37894(0.417907:0.34479:0.374124)	NA	NA	NA	NA
ycf3NL-ycf3PT	NG	NA	0.0271224	0	NA	504	112.622	391.378	NA	3	3	NA	NA	NA	0.00606066	1:1:1:1:1:1	0.405754(0.473214:0.392857:0.35119)	NA	NA	NA	NA
ycf4NL-ycf4PT	NG	0.00704382	0.00810216	0.869375	0.637567	552	124.092	427.908	NA	4	1	3	NA	NA	0.00728174	1:1:1:1:1:1	0.377717(0.413043:0.391304:0.328804)	NA	NA	NA	NA

## Sheet: NL_DL
Sequence	Method	Ka	Ks	Ka/Ks	P-Value(Fisher)	Length	S-Sites	N-Sites	Fold-Sites(0:2:4)	Substitutions	S-Substitutions	N-Substitutions	Fold-S-Substitutions(0:2:4)	Fold-N-Substitutions(0:2:4)	Divergence-Time	Substitution-Rate-Ratio(rTC:rAG:rTA:rCG:rTG:rCA/rCA)	GC(1:2:3)	ML-Score	AICc	Akaike-Weight	Model
accDNL-accDDL	NG	0.00169276	0.0134912	0.125471	0.0172635	1482	299.164	1182.84	NA	6	4	2	NA	NA	0.00407446	1:1:1:1:1:1	0.346438(0.393145:0.368952:0.277218)	NA	NA	NA	NA
atpANL-atpADL	NG	0.00436477	0.0135581	0.32193	0.0713853	1521	372.126	1148.87	NA	10	5	5	NA	NA	0.006614	1:1:1:1:1:1	0.408613(0.551282:0.397436:0.27712)	NA	NA	NA	NA
atpBNL-atpBDL	NG	0.000894534	0.0161543	0.0553743	0.00128579	1494	375.432	1118.57	NA	7	6	1	NA	NA	0.00472921	1:1:1:1:1:1	0.440094(0.572289:0.416667:0.331325)	NA	NA	NA	NA
atpENL-atpEDL	NG	NA	0.0213241	0	NA	399	95.1304	303.87	NA	2	2	NA	NA	NA	0.00508413	1:1:1:1:1:1	0.413534(0.511278:0.413534:0.315789)	NA	NA	NA	NA
atpFNL-atpFDL	NG	0.00235833	NA	NA	NA	552	127.305	424.695	NA	1	NA	1	NA	NA	0.00181444	1:1:1:1:1:1	0.397645(0.491848:0.342391:0.358696)	NA	NA	NA	NA
atpHNL-atpHDL	NG	NA	NA	NA	NA	243	67.3866	175.613	NA	0	NA	NA	NA	NA	NA	1:1:1:1:1:1	0.477366(0.641975:0.493827:0.296296)	NA	NA	NA	NA
atpINL-atpIDL	NG	NA	0.0113224	0	NA	741	177.977	563.023	NA	2	2	NA	NA	NA	0.00271948	1:1:1:1:1:1	0.373819(0.489879:0.368421:0.263158)	NA	NA	NA	NA
ccsANL-ccsADL	NG	0.00801076	0.00464397	1.72498	0.829922	969	216.001	752.999	NA	7	1	6	NA	NA	0.00726027	1:1:1:1:1:1	0.337977(0.357585:0.373065:0.283282)	NA	NA	NA	NA
cemANL-cemADL	NG	0.00365395	0.0276567	0.132118	0.0202324	696	147.313	548.687	NA	6	4	2	NA	NA	0.00873431	1:1:1:1:1:1	0.336207(0.396552:0.280172:0.331897)	NA	NA	NA	NA
clpPNL-clpPDL	NG	0.00225382	0.0211816	0.106404	0.0435954	588	143.641	444.359	NA	4	3	1	NA	NA	0.00687766	1:1:1:1:1:1	0.426871(0.566327:0.382653:0.331633)	NA	NA	NA	NA
matKNL-matKDL	NG	0.00758842	0.015355	0.494199	0.166318	1521	328.972	1192.03	NA	14	5	9	NA	NA	0.00926822	1:1:1:1:1:1	0.34714(0.416174:0.317554:0.307692)	NA	NA	NA	NA
ndhANL-ndhADL	NG	0.00121997	NA	NA	NA	1089	268.643	820.357	NA	1	NA	1	NA	NA	0.000919021	1:1:1:1:1:1	0.35124(0.433884:0.396694:0.22314)	NA	NA	NA	NA
ndhBNL-ndhBDL	NG	0.00129563	0.00138147	0.937863	0.363135	1521	362.265	1158.73	NA	2	0.5	1.5	NA	NA	0.00131608	1:1:1:1:1:1	0.376068(0.418146:0.385602:0.324458)	NA	NA	NA	NA
ndhCNL-ndhCDL	NG	NA	0.0121542	0	NA	360	82.9446	277.055	NA	1	1	NA	NA	NA	0.00280035	1:1:1:1:1:1	0.354167(0.466667:0.333333:0.2625)	NA	NA	NA	NA
ndhDNL-ndhDDL	NG	0.00606983	0.0282987	0.214491	0.00191441	1518	360.081	1157.92	NA	17	10	7	NA	NA	0.0113427	1:1:1:1:1:1	0.364706(0.407843:0.372549:0.313725)	NA	NA	NA	NA
ndhENL-ndhEDL	NG	0.00433035	NA	NA	NA	303	71.4044	231.596	NA	1	NA	1	NA	NA	0.00330987	1:1:1:1:1:1	0.338284(0.40099:0.356436:0.257426)	NA	NA	NA	NA
ndhFNL-ndhFDL	NG	0.00922216	0.0289875	0.318142	0.00222667	2238	492.36	1745.64	NA	30	14	16	NA	NA	0.0135705	1:1:1:1:1:1	0.325301(0.372825:0.350067:0.253012)	NA	NA	NA	NA
ndhGNL-ndhGDL	NG	NA	0.0395209	0	NA	534	129.878	404.122	NA	5	5	NA	NA	NA	0.00961216	1:1:1:1:1:1	0.351124(0.432584:0.359551:0.261236)	NA	NA	NA	NA
ndhHNL-ndhHDL	NG	0.00217944	0.0155448	0.140204	0.023683	1179	259.997	919.003	NA	6	4	2	NA	NA	0.00512681	1:1:1:1:1:1	0.389313(0.521628:0.366412:0.279898)	NA	NA	NA	NA
ndhINL-ndhIDL	NG	0.00514513	0.0182466	0.281977	0.211733	501	110.948	390.052	NA	4	2	2	NA	NA	0.0080465	1:1:1:1:1:1	0.373253(0.443114:0.377246:0.299401)	NA	NA	NA	NA
ndhJNL-ndhJDL	NG	NA	0.0190196	0	NA	474	106.493	367.507	NA	2	2	NA	NA	NA	0.00427314	1:1:1:1:1:1	0.407173(0.537975:0.367089:0.316456)	NA	NA	NA	NA
ndhKNL-ndhKDL	NG	NA	0.0185291	0	NA	687	163.916	523.084	NA	3	3	NA	NA	NA	0.00442098	1:1:1:1:1:1	0.390102(0.449782:0.432314:0.28821)	NA	NA	NA	NA
petANL-petADL	NG	NA	0.0177215	0	NA	960	228.391	731.609	NA	4	4	NA	NA	NA	0.00421609	1:1:1:1:1:1	0.403125(0.53125:0.36875:0.309375)	NA	NA	NA	NA
petBNL-petBDL	NG	NA	0.0129301	0	NA	645	156.015	488.985	NA	2	2	NA	NA	NA	0.00312758	1:1:1:1:1:1	0.407752(0.493023:0.418605:0.311628)	NA	NA	NA	NA
petDNL-petDDL	NG	NA	0.00857598	0	NA	480	117.273	362.727	NA	1	1	NA	NA	NA	0.00209527	1:1:1:1:1:1	0.392708(0.509375:0.3875:0.28125)	NA	NA	NA	NA
petGNL-petGDL	NG	NA	NA	NA	NA	111	27.4074	83.5926	NA	0	NA	NA	NA	NA	NA	1:1:1:1:1:1	0.369369(0.513514:0.297297:0.297297)	NA	NA	NA	NA
petLNL-petLDL	NG	NA	NA	NA	NA	93	24.3491	68.6509	NA	0	NA	NA	NA	NA	NA	1:1:1:1:1:1	0.354839(0.354839:0.451613:0.258065)	NA	NA	NA	NA
petNNL-petNDL	NG	NA	NA	NA	NA	87	20.6498	66.3502	NA	0	NA	NA	NA	NA	NA	1:1:1:1:1:1	0.436782(0.482759:0.448276:0.37931)	NA	NA	NA	NA
psaANL-psaADL	NG	NA	0.0134196	0	NA	2250	526.305	1723.7	NA	7	7	NA	NA	NA	0.00313903	1:1:1:1:1:1	0.433111(0.526667:0.436:0.336667)	NA	NA	NA	NA
psaBNL-psaBDL	NG	0.00176692	0.0120453	0.146689	0.000718858	2202	502.129	1699.87	NA	9	6	3	NA	NA	0.00411074	1:1:1:1:1:1	0.415985(0.490463:0.430518:0.326975)	NA	NA	NA	NA
psaCNL-psaCDL	NG	NA	NA	NA	NA	243	55.5129	187.487	NA	0	NA	NA	NA	NA	NA	1:1:1:1:1:1	0.407407(0.45679:0.530864:0.234568)	NA	NA	NA	NA
psaINL-psaIDL	NG	0.0239372	NA	NA	NA	111	26.1077	84.8923	NA	2	NA	2	NA	NA	0.0183071	1:1:1:1:1:1	0.346847(0.459459:0.27027:0.310811)	NA	NA	NA	NA
psaJNL-psaJDL	NG	NA	0.0324618	0	NA	132	31.4769	100.523	NA	1	1	NA	NA	NA	0.00774089	1:1:1:1:1:1	0.390152(0.409091:0.409091:0.352273)	NA	NA	NA	NA
psbANL-psbADL	NG	NA	0.00810974	0	NA	1059	247.953	811.047	NA	2	2	NA	NA	NA	0.0018988	1:1:1:1:1:1	0.424929(0.504249:0.436261:0.334278)	NA	NA	NA	NA
psbBNL-psbBDL	NG	0.000860889	0.0196047	0.0439123	0.000248855	1524	361.744	1162.26	NA	8	7	1	NA	NA	0.00531001	1:1:1:1:1:1	0.434383(0.543307:0.459646:0.300197)	NA	NA	NA	NA
psbCNL-psbCDL	NG	NA	0.0116304	0	NA	1419	346.6	1072.4	NA	4	4	NA	NA	NA	0.0028408	1:1:1:1:1:1	0.445384(0.540169:0.458774:0.337209)	NA	NA	NA	NA
psbDNL-psbDDL	NG	0.00247102	0.0204136	0.121048	0.0093836	1059	248.283	810.717	NA	7	5	2	NA	NA	0.00667767	1:1:1:1:1:1	0.426818(0.524079:0.433428:0.322946)	NA	NA	NA	NA
psbENL-psbEDL	NG	NA	0.0176409	0	NA	249	57.3559	191.644	NA	1	1	NA	NA	NA	0.00406348	1:1:1:1:1:1	0.415663(0.433735:0.481928:0.331325)	NA	NA	NA	NA
psbFNL-psbFDL	NG	NA	NA	NA	NA	117	30.1053	86.8947	NA	0	NA	NA	NA	NA	NA	1:1:1:1:1:1	0.418803(0.487179:0.435897:0.333333)	NA	NA	NA	NA
psbHNL-psbHDL	NG	NA	NA	NA	NA	219	56.8031	162.197	NA	0	NA	NA	NA	NA	NA	1:1:1:1:1:1	0.420091(0.479452:0.479452:0.30137)	NA	NA	NA	NA
psbINL-psbIDL	NG	NA	0.0382294	0	NA	108	26.8302	81.1698	NA	1	1	NA	NA	NA	0.00949725	1:1:1:1:1:1	0.402778(0.527778:0.305556:0.375)	NA	NA	NA	NA
psbJNL-psbJDL	NG	0.0114447	NA	NA	NA	120	31.9547	88.0453	NA	1	NA	1	NA	NA	0.00839708	1:1:1:1:1:1	0.404167(0.3875:0.5:0.325)	NA	NA	NA	NA
psbKNL-psbKDL	NG	NA	NA	NA	NA	183	40.5531	142.447	NA	0	NA	NA	NA	NA	NA	1:1:1:1:1:1	0.338798(0.409836:0.327869:0.278689)	NA	NA	NA	NA
psbLNL-psbLDL	NG	NA	0.0435758	0	NA	114	23.6216	90.3784	NA	1	1	NA	NA	NA	0.00902923	1:1:1:1:1:1	0.337719(0.368421:0.263158:0.381579)	NA	NA	NA	NA
psbMNL-psbMDL	NG	NA	NA	NA	NA	102	24.7375	77.2625	NA	0	NA	NA	NA	NA	NA	1:1:1:1:1:1	0.323529(0.470588:0.294118:0.205882)	NA	NA	NA	NA
psbNNL-psbNDL	NG	0.0104078	0.031667	0.328664	0.37793	129	32.25	96.75	NA	2	1	1	NA	NA	0.0157226	1:1:1:1:1:1	0.44186(0.581395:0.430233:0.313953)	NA	NA	NA	NA
psbTNL-psbTDL	NG	0.0124659	NA	NA	NA	105	24.1124	80.8876	NA	1	NA	1	NA	NA	0.00960318	1:1:1:1:1:1	0.366667(0.414286:0.314286:0.371429)	NA	NA	NA	NA
psbZNL-psbZDL	NG	NA	NA	NA	NA	186	47.0886	138.911	NA	0	NA	NA	NA	NA	NA	1:1:1:1:1:1	0.360215(0.387097:0.419355:0.274194)	NA	NA	NA	NA
rbcLNL-rbcLDL	NG	0.00463184	0.00881897	0.525213	0.296745	1425	342.18	1082.82	NA	8	3	5	NA	NA	0.00563728	1:1:1:1:1:1	0.446667(0.581053:0.44:0.318947)	NA	NA	NA	NA
rpl14NL-rpl14DL	NG	NA	NA	NA	NA	366	88.2383	277.762	NA	0	NA	NA	NA	NA	NA	1:1:1:1:1:1	0.404372(0.540984:0.385246:0.286885)	NA	NA	NA	NA
rpl16NL-rpl16DL	NG	0.00329706	0.0302972	0.108824	0.0459094	405	101.033	303.967	NA	4	3	1	NA	NA	0.0100326	1:1:1:1:1:1	0.42716(0.511111:0.52963:0.240741)	NA	NA	NA	NA
rpl20NL-rpl20DL	NG	0.00341557	0.011125	0.307019	0.361363	384	90.5563	293.444	NA	2	1	1	NA	NA	0.00523363	1:1:1:1:1:1	0.375(0.390625:0.457031:0.277344)	NA	NA	NA	NA
rpl22NL-rpl22DL	NG	NA	NA	NA	NA	486	105.637	380.363	NA	0	NA	NA	NA	NA	NA	1:1:1:1:1:1	0.360082(0.407407:0.376543:0.296296)	NA	NA	NA	NA
rpl23NL-rpl23DL	NG	NA	NA	NA	NA	279	63.0783	215.922	NA	0	NA	NA	NA	NA	NA	1:1:1:1:1:1	0.383513(0.430108:0.408602:0.311828)	NA	NA	NA	NA
rpl2NL-rpl2DL	NG	NA	NA	NA	NA	822	202.647	619.353	NA	0	NA	NA	NA	NA	NA	1:1:1:1:1:1	0.441606(0.514599:0.489051:0.321168)	NA	NA	NA	NA
rpl32NL-rpl32DL	NG	0.00810233	0.0912678	0.0887754	0.0314307	159	34.9109	124.089	NA	4	3	1	NA	NA	0.0263626	1:1:1:1:1:1	0.327044(0.273585:0.462264:0.245283)	NA	NA	NA	NA
rpl33NL-rpl33DL	NG	NA	0.0458319	0	NA	204	44.9846	159.015	NA	2	2	NA	NA	NA	0.0101065	1:1:1:1:1:1	0.367647(0.367647:0.411765:0.323529)	NA	NA	NA	NA
rpl36NL-rpl36DL	NG	NA	0.0379144	0	NA	111	27.0475	83.9525	NA	1	1	NA	NA	NA	0.00923864	1:1:1:1:1:1	0.40991(0.459459:0.486486:0.283784)	NA	NA	NA	NA
rpoANL-rpoADL	NG	0.0132197	0.00923663	1.43122	0.951831	981	217.865	763.135	NA	12	2	10	NA	NA	0.0123351	1:1:1:1:1:1	0.362895(0.474006:0.324159:0.29052)	NA	NA	NA	NA
rpoBNL-rpoBDL	NG	0.00203424	0.0107614	0.189032	0.000556264	3210	748.746	2461.25	NA	13	8	5	NA	NA	0.00406988	1:1:1:1:1:1	0.398598(0.507009:0.378505:0.31028)	NA	NA	NA	NA
rpoC1NL-rpoC1DL	NG	0.000638173	0.012811	0.0498144	0.000811328	2040	472.359	1567.64	NA	7	6	1	NA	NA	0.00345677	1:1:1:1:1:1	0.3875(0.505882:0.381618:0.275)	NA	NA	NA	NA
rpoC2NL-rpoC2DL	NG	0.00438532	0.010368	0.422967	0.0469595	4173	971.189	3201.81	NA	24	10	14	NA	NA	0.00577768	1:1:1:1:1:1	0.386772(0.469446:0.378145:0.312725)	NA	NA	NA	NA
rps11NL-rps11DL	NG	0.00659442	0.027942	0.236004	0.116549	414	109.378	304.622	NA	5	3	2	NA	NA	0.0122344	1:1:1:1:1:1	0.472222(0.543478:0.59058:0.282609)	NA	NA	NA	NA
rps12NL-rps12DL	NG	NA	NA	NA	NA	369	96.3211	272.679	NA	0	NA	NA	NA	NA	NA	1:1:1:1:1:1	0.447154(0.528455:0.495935:0.317073)	NA	NA	NA	NA
rps14NL-rps14DL	NG	0.008646	NA	NA	NA	300	67.3434	232.657	NA	2	NA	2	NA	NA	0.00670517	1:1:1:1:1:1	0.416667(0.46:0.45:0.34)	NA	NA	NA	NA
rps15NL-rps15DL	NG	0.0184769	0.051892	0.356064	0.171372	279	59.8354	219.165	NA	7	3	4	NA	NA	0.0256432	1:1:1:1:1:1	0.324373(0.392473:0.274194:0.306452)	NA	NA	NA	NA
rps16NL-rps16DL	NG	NA	0.0316541	0	NA	264	64.5256	199.474	NA	2	2	NA	NA	NA	0.00773675	1:1:1:1:1:1	0.375(0.528409:0.363636:0.232955)	NA	NA	NA	NA
rps18NL-rps18DL	NG	0.00388254	0.0134952	0.287698	0.349284	333	74.7692	258.231	NA	2	1	1	NA	NA	0.00604088	1:1:1:1:1:1	0.334835(0.337838:0.405405:0.261261)	NA	NA	NA	NA
rps19NL-rps19DL	NG	NA	NA	NA	NA	276	63.9554	212.045	NA	0	NA	NA	NA	NA	NA	1:1:1:1:1:1	0.358696(0.434783:0.402174:0.23913)	NA	NA	NA	NA
rps2NL-rps2DL	NG	0.00551264	0.0124644	0.442271	0.321238	708	161.794	546.206	NA	5	2	3	NA	NA	0.00710128	1:1:1:1:1:1	0.387006(0.434322:0.417373:0.309322)	NA	NA	NA	NA
rps3NL-rps3DL	NG	NA	NA	NA	NA	660	149.921	510.079	NA	0	NA	NA	NA	NA	NA	1:1:1:1:1:1	0.345455(0.481818:0.336364:0.218182)	NA	NA	NA	NA
rps4NL-rps4DL	NG	0.00218057	0.0211675	0.103015	0.0408099	603	143.736	459.264	NA	4	3	1	NA	NA	0.00670645	1:1:1:1:1:1	0.381426(0.524876:0.373134:0.246269)	NA	NA	NA	NA
rps7NL-rps7DL	NG	NA	NA	NA	NA	465	114.435	350.565	NA	0	NA	NA	NA	NA	NA	1:1:1:1:1:1	0.412903(0.535484:0.451613:0.251613)	NA	NA	NA	NA
rps8NL-rps8DL	NG	NA	0.0100603	0	NA	402	100.069	301.931	NA	1	1	NA	NA	NA	0.00250428	1:1:1:1:1:1	0.374378(0.440299:0.410448:0.272388)	NA	NA	NA	NA
ycf1NL-ycf1DL	NG	0.0113334	0.0157218	0.720872	0.229896	5691	1156.95	4534.05	NA	69	18	51	NA	NA	0.0122256	1:1:1:1:1:1	0.303484(0.354517:0.289653:0.266282)	NA	NA	NA	NA
ycf2NL-ycf2DL	NG	0.000746899	0.00134542	0.555141	0.387082	6846	1487.86	5358.14	NA	6	2	4	NA	NA	0.000876977	1:1:1:1:1:1	0.37839(0.417542:0.344269:0.37336)	NA	NA	NA	NA
ycf3NL-ycf3DL	NG	NA	NA	NA	NA	504	112.972	391.028	NA	0	NA	NA	NA	NA	NA	1:1:1:1:1:1	0.406746(0.47619:0.392857:0.35119)	NA	NA	NA	NA
ycf4NL-ycf4DL	NG	0.00234207	0.0162572	0.144063	0	552	124.36	427.64	NA	3	2	1	NA	NA	0.00547702	1:1:1:1:1:1	0.379529(0.413043:0.394022:0.331522)	NA	NA	NA	NA

## Sheet: NL_LC
Sequence	Method	Ka	Ks	Ka/Ks	P-Value(Fisher)	Length	S-Sites	N-Sites	Fold-Sites(0:2:4)	Substitutions	S-Substitutions	N-Substitutions	Fold-S-Substitutions(0:2:4)	Fold-N-Substitutions(0:2:4)	Divergence-Time	Substitution-Rate-Ratio(rTC:rAG:rTA:rCG:rTG:rCA/rCA)	GC(1:2:3)	ML-Score	AICc	Akaike-Weight	Model
accDNL-accDLC	NG	0.00168621	0.0134275	0.125579	0.0173053	1488	300.571	1187.43	NA	6	4	2	NA	NA	0.0040579	1:1:1:1:1:1	0.347446(0.392137:0.36996:0.280242)	NA	NA	NA	NA
atpANL-atpALC	NG	0.00261482	0.0163186	0.160235	0.00868583	1521	371.692	1149.31	NA	9	6	3	NA	NA	0.00596367	1:1:1:1:1:1	0.407298(0.550296:0.39645:0.275148)	NA	NA	NA	NA
atpBNL-atpBLC	NG	0.000894534	0.0216173	0.0413804	0.00010183	1494	375.432	1118.57	NA	9	8	1	NA	NA	0.00610204	1:1:1:1:1:1	0.440763(0.572289:0.416667:0.333333)	NA	NA	NA	NA
atpENL-atpELC	NG	NA	0.0322179	0	NA	399	95.1304	303.87	NA	3	3	NA	NA	NA	0.00768145	1:1:1:1:1:1	0.414787(0.511278:0.413534:0.319549)	NA	NA	NA	NA
atpFNL-atpFLC	NG	0.00235833	0.00789658	0.298653	0.355518	552	127.305	424.695	NA	2	1	1	NA	NA	0.00363559	1:1:1:1:1:1	0.398551(0.491848:0.342391:0.361413)	NA	NA	NA	NA
atpHNL-atpHLC	NG	NA	NA	NA	NA	243	67.3866	175.613	NA	0	NA	NA	NA	NA	NA	1:1:1:1:1:1	0.477366(0.641975:0.493827:0.296296)	NA	NA	NA	NA
atpINL-atpILC	NG	0.0017804	0.0112787	0.157854	0.132144	741	178.661	562.339	NA	3	2	1	NA	NA	0.00407053	1:1:1:1:1:1	0.374494(0.491903:0.368421:0.263158)	NA	NA	NA	NA
ccsANL-ccsALC	NG	0.00132859	NA	NA	NA	969	215.657	753.343	NA	1	NA	1	NA	NA	0.00103291	1:1:1:1:1:1	0.340041(0.359133:0.376161:0.28483)	NA	NA	NA	NA
cemANL-cemALC	NG	0.0054859	0.0276896	0.198121	0.0394878	696	147.142	548.858	NA	7	4	3	NA	NA	0.01018	1:1:1:1:1:1	0.337644(0.394397:0.280172:0.338362)	NA	NA	NA	NA
clpPNL-clpPLC	NG	0.00225403	0.0211754	0.106446	0.0436299	588	143.684	444.316	NA	4	3	1	NA	NA	0.00687764	1:1:1:1:1:1	0.42517(0.566327:0.382653:0.326531)	NA	NA	NA	NA
matKNL-matKLC	NG	0.0101431	0.0153109	0.662475	0.373715	1521	329.909	1191.09	NA	17	5	12	NA	NA	0.011264	1:1:1:1:1:1	0.348126(0.416174:0.319527:0.308679)	NA	NA	NA	NA
ndhANL-ndhALC	NG	0.00122023	0.011244	0.108523	0.045056	1089	268.815	820.185	NA	4	3	1	NA	NA	0.00369454	1:1:1:1:1:1	0.353535(0.436639:0.396694:0.227273)	NA	NA	NA	NA
ndhBNL-ndhBLC	NG	0.00129563	0.00138147	0.937863	0.363135	1521	362.265	1158.73	NA	2	0.5	1.5	NA	NA	0.00131608	1:1:1:1:1:1	0.376068(0.418146:0.385602:0.324458)	NA	NA	NA	NA
ndhCNL-ndhCLC	NG	0.0036181	NA	NA	NA	360	82.9446	277.055	NA	1	NA	1	NA	NA	0.00278448	1:1:1:1:1:1	0.354167(0.466667:0.3375:0.258333)	NA	NA	NA	NA
ndhDNL-ndhDLC	NG	0.00348024	0.03733	0.0932291	4.65958e-07	1509	356.984	1152.02	NA	17	13	4	NA	NA	0.0114881	1:1:1:1:1:1	0.366799(0.414513:0.372763:0.313121)	NA	NA	NA	NA
ndhENL-ndhELC	NG	0.00433035	NA	NA	NA	303	71.4044	231.596	NA	1	NA	1	NA	NA	0.00330987	1:1:1:1:1:1	0.338284(0.40099:0.356436:0.257426)	NA	NA	NA	NA
ndhFNL-ndhFLC	NG	0.00981639	0.03752	0.261631	2.67365e-05	2235	491.844	1743.16	NA	35	18	17	NA	NA	0.015913	1:1:1:1:1:1	0.325727(0.374497:0.350336:0.252349)	NA	NA	NA	NA
ndhGNL-ndhGLC	NG	NA	0.0234618	0	NA	534	129.878	404.122	NA	3	3	NA	NA	NA	0.00570631	1:1:1:1:1:1	0.349251(0.432584:0.359551:0.255618)	NA	NA	NA	NA
ndhHNL-ndhHLC	NG	0.00436687	0.023408	0.186555	0.0102809	1179	260.344	918.656	NA	10	6	4	NA	NA	0.00857148	1:1:1:1:1:1	0.390161(0.520356:0.367684:0.282443)	NA	NA	NA	NA
ndhINL-ndhILC	NG	NA	0.0563514	0	NA	501	110.525	390.475	NA	6	6	NA	NA	NA	0.0124316	1:1:1:1:1:1	0.37525(0.443114:0.377246:0.305389)	NA	NA	NA	NA
ndhJNL-ndhJLC	NG	NA	0.0190196	0	NA	474	106.493	367.507	NA	2	2	NA	NA	NA	0.00427314	1:1:1:1:1:1	0.407173(0.537975:0.367089:0.316456)	NA	NA	NA	NA
ndhKNL-ndhKLC	NG	0.00191229	0.0185884	0.102875	0.0406227	687	163.399	523.601	NA	4	3	1	NA	NA	0.00587861	1:1:1:1:1:1	0.389374(0.449782:0.430131:0.28821)	NA	NA	NA	NA
petANL-petALC	NG	NA	0.017735	0	NA	960	228.219	731.781	NA	4	4	NA	NA	NA	0.00421612	1:1:1:1:1:1	0.40625(0.53125:0.36875:0.31875)	NA	NA	NA	NA
petBNL-petBLC	NG	NA	0.026087	0	NA	645	156.015	488.985	NA	4	4	NA	NA	NA	0.00631003	1:1:1:1:1:1	0.407752(0.493023:0.418605:0.311628)	NA	NA	NA	NA
petDNL-petDLC	NG	NA	0.00860112	0	NA	480	116.932	363.068	NA	1	1	NA	NA	NA	0.0020953	1:1:1:1:1:1	0.390625(0.50625:0.3875:0.278125)	NA	NA	NA	NA
petGNL-petGLC	NG	NA	NA	NA	NA	111	27.4074	83.5926	NA	0	NA	NA	NA	NA	NA	1:1:1:1:1:1	0.369369(0.513514:0.297297:0.297297)	NA	NA	NA	NA
petLNL-petLLC	NG	NA	NA	NA	NA	93	24.3491	68.6509	NA	0	NA	NA	NA	NA	NA	1:1:1:1:1:1	0.354839(0.354839:0.451613:0.258065)	NA	NA	NA	NA
petNNL-petNLC	NG	NA	NA	NA	NA	87	20.6498	66.3502	NA	0	NA	NA	NA	NA	NA	1:1:1:1:1:1	0.436782(0.482759:0.448276:0.37931)	NA	NA	NA	NA
psaANL-psaALC	NG	0.000580373	0.0134196	0.0432481	0.000228434	2250	526.305	1723.7	NA	8	7	1	NA	NA	0.00358364	1:1:1:1:1:1	0.432444(0.526667:0.435333:0.335333)	NA	NA	NA	NA
psaBNL-psaBLC	NG	0.00117763	0.0120402	0.0978079	0.0025027	2202	502.34	1699.66	NA	8	6	2	NA	NA	0.0036557	1:1:1:1:1:1	0.415531(0.491144:0.430518:0.324932)	NA	NA	NA	NA
psaCNL-psaCLC	NG	NA	0.0182337	0	NA	243	55.5129	187.487	NA	1	1	NA	NA	NA	0.00416545	1:1:1:1:1:1	0.407407(0.45679:0.530864:0.234568)	NA	NA	NA	NA
psaINL-psaILC	NG	0.0118787	NA	NA	NA	111	26.1474	84.8526	NA	1	NA	1	NA	NA	0.00908054	1:1:1:1:1:1	0.351351(0.459459:0.27027:0.324324)	NA	NA	NA	NA
psaJNL-psaJLC	NG	NA	0.0324618	0	NA	132	31.4769	100.523	NA	1	1	NA	NA	NA	0.00774089	1:1:1:1:1:1	0.390152(0.409091:0.409091:0.352273)	NA	NA	NA	NA
psbANL-psbALC	NG	0.00123347	0.0204697	0.0602582	0.00312878	1059	247.612	811.388	NA	6	5	1	NA	NA	0.00573122	1:1:1:1:1:1	0.424929(0.504249:0.436261:0.334278)	NA	NA	NA	NA
psbBNL-psbBLC	NG	0.000860889	0.0253015	0.0340252	1.69961e-05	1524	361.744	1162.26	NA	10	9	1	NA	NA	0.00666223	1:1:1:1:1:1	0.436024(0.543307:0.459646:0.305118)	NA	NA	NA	NA
psbCNL-psbCLC	NG	0.0018664	0.00580131	0.321721	0.247807	1419	346.085	1072.91	NA	4	2	2	NA	NA	0.0028261	1:1:1:1:1:1	0.444679(0.538055:0.457717:0.338266)	NA	NA	NA	NA
psbDNL-psbDLC	NG	0.00123449	0.0245639	0.0502564	0.00085423	1059	248.283	810.717	NA	7	6	1	NA	NA	0.00670407	1:1:1:1:1:1	0.425873(0.522663:0.433428:0.32153)	NA	NA	NA	NA
psbENL-psbELC	NG	NA	0.0176409	0	NA	249	57.3559	191.644	NA	1	1	NA	NA	NA	0.00406348	1:1:1:1:1:1	0.415663(0.433735:0.481928:0.331325)	NA	NA	NA	NA
psbFNL-psbFLC	NG	NA	0.0339748	0	NA	117	30.1053	86.8947	NA	1	1	NA	NA	NA	0.00874206	1:1:1:1:1:1	0.41453(0.487179:0.435897:0.320513)	NA	NA	NA	NA
psbHNL-psbHLC	NG	NA	NA	NA	NA	219	56.8031	162.197	NA	0	NA	NA	NA	NA	NA	1:1:1:1:1:1	0.420091(0.479452:0.479452:0.30137)	NA	NA	NA	NA
psbINL-psbILC	NG	0.012396	NA	NA	NA	108	26.6604	81.3396	NA	1	NA	1	NA	NA	0.00933599	1:1:1:1:1:1	0.393519(0.513889:0.305556:0.361111)	NA	NA	NA	NA
psbJNL-psbJLC	NG	0.023112	NA	NA	NA	120	32.1246	87.8754	NA	2	NA	2	NA	NA	0.0169248	1:1:1:1:1:1	0.408333(0.4:0.5:0.325)	NA	NA	NA	NA
psbKNL-psbKLC	NG	0.00704475	NA	NA	NA	183	40.3827	142.617	NA	1	NA	1	NA	NA	0.00549018	1:1:1:1:1:1	0.336066(0.401639:0.327869:0.278689)	NA	NA	NA	NA
psbLNL-psbLLC	NG	NA	0.0435758	0	NA	114	23.6216	90.3784	NA	1	1	NA	NA	NA	0.00902923	1:1:1:1:1:1	0.337719(0.368421:0.263158:0.381579)	NA	NA	NA	NA
psbMNL-psbMLC	NG	NA	NA	NA	NA	102	24.7375	77.2625	NA	0	NA	NA	NA	NA	NA	1:1:1:1:1:1	0.323529(0.470588:0.294118:0.205882)	NA	NA	NA	NA
psbNNL-psbNLC	NG	0.0104078	NA	NA	NA	129	32.25	96.75	NA	1	NA	1	NA	NA	0.00780585	1:1:1:1:1:1	0.437984(0.581395:0.430233:0.302326)	NA	NA	NA	NA
psbTNL-psbTLC	NG	NA	NA	NA	NA	105	23.9414	81.0586	NA	0	NA	NA	NA	NA	NA	1:1:1:1:1:1	0.361905(0.4:0.314286:0.371429)	NA	NA	NA	NA
psbZNL-psbZLC	NG	NA	NA	NA	NA	186	47.0886	138.911	NA	0	NA	NA	NA	NA	NA	1:1:1:1:1:1	0.360215(0.387097:0.419355:0.274194)	NA	NA	NA	NA
rbcLNL-rbcLLC	NG	0.00277489	0.00293076	0.946817	0.6634	1425	341.876	1083.12	NA	4	1	3	NA	NA	0.00281229	1:1:1:1:1:1	0.446316(0.581053:0.438947:0.318947)	NA	NA	NA	NA
rpl14NL-rpl14LC	NG	NA	0.0114194	0	NA	366	88.2383	277.762	NA	1	1	NA	NA	NA	0.00275309	1:1:1:1:1:1	0.403005(0.540984:0.385246:0.282787)	NA	NA	NA	NA
rpl16NL-rpl16LC	NG	0.00329706	0.00996368	0.330908	0.37539	405	101.033	303.967	NA	2	1	1	NA	NA	0.00496014	1:1:1:1:1:1	0.42716(0.511111:0.52963:0.240741)	NA	NA	NA	NA
rpl20NL-rpl20LC	NG	0.00341557	0.011125	0.307019	0.361363	384	90.5563	293.444	NA	2	1	1	NA	NA	0.00523363	1:1:1:1:1:1	0.375(0.390625:0.457031:0.277344)	NA	NA	NA	NA
rpl22NL-rpl22LC	NG	NA	NA	NA	NA	486	105.637	380.363	NA	0	NA	NA	NA	NA	NA	1:1:1:1:1:1	0.360082(0.407407:0.376543:0.296296)	NA	NA	NA	NA
rpl23NL-rpl23LC	NG	NA	NA	NA	NA	279	63.0783	215.922	NA	0	NA	NA	NA	NA	NA	1:1:1:1:1:1	0.383513(0.430108:0.408602:0.311828)	NA	NA	NA	NA
rpl2NL-rpl2LC	NG	NA	NA	NA	NA	822	202.647	619.353	NA	0	NA	NA	NA	NA	NA	1:1:1:1:1:1	0.441606(0.514599:0.489051:0.321168)	NA	NA	NA	NA
rpl32NL-rpl32LC	NG	NA	0.0903169	0	NA	159	35.2565	123.743	NA	3	3	NA	NA	NA	0.0200268	1:1:1:1:1:1	0.330189(0.273585:0.471698:0.245283)	NA	NA	NA	NA
rpl33NL-rpl33LC	NG	NA	0.0458319	0	NA	204	44.9846	159.015	NA	2	2	NA	NA	NA	0.0101065	1:1:1:1:1:1	0.367647(0.367647:0.411765:0.323529)	NA	NA	NA	NA
rpl36NL-rpl36LC	NG	NA	0.0379144	0	NA	111	27.0475	83.9525	NA	1	1	NA	NA	NA	0.00923864	1:1:1:1:1:1	0.40991(0.459459:0.486486:0.283784)	NA	NA	NA	NA
rpoANL-rpoALC	NG	0.0158865	0.0139141	1.14176	0.977472	981	217.615	763.385	NA	15	3	12	NA	NA	0.015449	1:1:1:1:1:1	0.363405(0.472477:0.325688:0.292049)	NA	NA	NA	NA
rpoBNL-rpoBLC	NG	0.00244171	0.0121181	0.201493	0.00245642	3210	748.706	2461.29	NA	15	9	6	NA	NA	0.00469865	1:1:1:1:1:1	0.399377(0.507009:0.378972:0.31215)	NA	NA	NA	NA
rpoC1NL-rpoC1LC	NG	0.00319549	0.0193161	0.165431	0.00114352	2040	471.958	1568.04	NA	14	9	5	NA	NA	0.00692503	1:1:1:1:1:1	0.3875(0.505882:0.380882:0.275735)	NA	NA	NA	NA
rpoC2NL-rpoC2LC	NG	0.00438532	0.0082829	0.529443	0.198547	4173	971.189	3201.81	NA	22	8	14	NA	NA	0.00529241	1:1:1:1:1:1	0.387491(0.470165:0.378145:0.314162)	NA	NA	NA	NA
rps11NL-rps11LC	NG	0.00328996	0.0569654	0.0577537	0.00160323	414	109.378	304.622	NA	7	6	1	NA	NA	0.0174709	1:1:1:1:1:1	0.477053(0.543478:0.594203:0.293478)	NA	NA	NA	NA
rps12NL-rps12LC	NG	0.00367164	NA	NA	NA	369	95.9746	273.025	NA	1	NA	1	NA	NA	0.00271667	1:1:1:1:1:1	0.448509(0.528455:0.495935:0.321138)	NA	NA	NA	NA
rps14NL-rps14LC	NG	0.00431054	NA	NA	NA	300	67.3434	232.657	NA	1	NA	1	NA	NA	0.00334292	1:1:1:1:1:1	0.418333(0.465:0.45:0.34)	NA	NA	NA	NA
rps15NL-rps15LC	NG	0.0184769	0.0341927	0.540374	0.380384	279	59.8354	219.165	NA	6	2	4	NA	NA	0.0218474	1:1:1:1:1:1	0.322581(0.392473:0.274194:0.301075)	NA	NA	NA	NA
rps16NL-rps16LC	NG	NA	NA	NA	NA	264	64.8725	199.127	NA	0	NA	NA	NA	NA	NA	1:1:1:1:1:1	0.375(0.534091:0.363636:0.227273)	NA	NA	NA	NA
rps18NL-rps18LC	NG	0.00388254	0.0134952	0.287698	0.349284	333	74.7692	258.231	NA	2	1	1	NA	NA	0.00604088	1:1:1:1:1:1	0.334835(0.337838:0.405405:0.261261)	NA	NA	NA	NA
rps19NL-rps19LC	NG	NA	NA	NA	NA	276	63.9554	212.045	NA	0	NA	NA	NA	NA	NA	1:1:1:1:1:1	0.358696(0.434783:0.402174:0.23913)	NA	NA	NA	NA
rps2NL-rps2LC	NG	0.00551225	0.0251457	0.219213	0.0514626	708	161.755	546.245	NA	7	4	3	NA	NA	0.00999784	1:1:1:1:1:1	0.388418(0.434322:0.419492:0.311441)	NA	NA	NA	NA
rps3NL-rps3LC	NG	NA	NA	NA	NA	660	149.921	510.079	NA	0	NA	NA	NA	NA	NA	1:1:1:1:1:1	0.345455(0.481818:0.336364:0.218182)	NA	NA	NA	NA
rps4NL-rps4LC	NG	0.00218057	0.0140451	0.155255	0.129568	603	143.736	459.264	NA	3	2	1	NA	NA	0.00500869	1:1:1:1:1:1	0.382255(0.524876:0.373134:0.248756)	NA	NA	NA	NA
rps7NL-rps7LC	NG	NA	NA	NA	NA	465	114.435	350.565	NA	0	NA	NA	NA	NA	NA	1:1:1:1:1:1	0.412903(0.535484:0.451613:0.251613)	NA	NA	NA	NA
rps8NL-rps8LC	NG	0.00332125	0.0202221	0.164239	0.139665	402	100.241	301.759	NA	3	2	1	NA	NA	0.00753557	1:1:1:1:1:1	0.371891(0.436567:0.410448:0.268657)	NA	NA	NA	NA
ycf1NL-ycf1LC	NG	0.0107198	0.0110944	0.966236	0.872868	5691	1157.75	4533.25	NA	61	12.75	48.25	NA	NA	0.010796	1:1:1:1:1:1	0.305131(0.356879:0.289668:0.268846)	NA	NA	NA	NA
ycf2NL-ycf2LC	NG	0.000746233	0.00201738	0.369902	0.178953	6852	1489.08	5362.92	NA	7	3	4	NA	NA	0.00102248	1:1:1:1:1:1	0.378649(0.417688:0.344352:0.373905)	NA	NA	NA	NA
ycf3NL-ycf3LC	NG	NA	NA	NA	NA	504	112.972	391.028	NA	0	NA	NA	NA	NA	NA	1:1:1:1:1:1	0.406746(0.47619:0.392857:0.35119)	NA	NA	NA	NA
ycf4NL-ycf4LC	NG	0.0023406	0.0162928	0.143658	0.117217	552	124.092	427.908	NA	3	2	1	NA	NA	0.00547711	1:1:1:1:1:1	0.377717(0.413043:0.391304:0.328804)	NA	NA	NA	NA

## Sheet: NL_SM
Sequence	Method	Ka	Ks	Ka/Ks	P-Value(Fisher)	Length	S-Sites	N-Sites	Fold-Sites(0:2:4)	Substitutions	S-Substitutions	N-Substitutions	Fold-S-Substitutions(0:2:4)	Fold-N-Substitutions(0:2:4)	Divergence-Time	Substitution-Rate-Ratio(rTC:rAG:rTA:rCG:rTG:rCA/rCA)	GC(1:2:3)	ML-Score	AICc	Akaike-Weight	Model
accDNL-accDSM	NG	0.00847317	0.0304998	0.27781	0.00686315	1488	301.124	1186.88	NA	19	9	10	NA	NA	0.0129307	1:1:1:1:1:1	0.346774(0.393145:0.36996:0.277218)	NA	NA	NA	NA
atpANL-atpASM	NG	0.00436345	0.0414721	0.105214	2.36536e-06	1521	371.781	1149.22	NA	20	15	5	NA	NA	0.013434	1:1:1:1:1:1	0.407627(0.551282:0.39645:0.275148)	NA	NA	NA	NA
atpBNL-atpBSM	NG	0.00268691	0.0438711	0.0612456	8.82536e-08	1494	375.475	1118.52	NA	19	16	3	NA	NA	0.0130374	1:1:1:1:1:1	0.43909(0.571285:0.415663:0.330321)	NA	NA	NA	NA
atpENL-atpESM	NG	0.00661082	0.0432722	0.152773	0.0305843	399	95.1304	303.87	NA	6	4	2	NA	NA	0.0153517	1:1:1:1:1:1	0.411028(0.511278:0.413534:0.308271)	NA	NA	NA	NA
atpFNL-atpFSM	NG	0.00709737	0.00789658	0.898791	0.648028	552	127.305	424.695	NA	4	1	3	NA	NA	0.00728169	1:1:1:1:1:1	0.394928(0.491848:0.336957:0.355978)	NA	NA	NA	NA
atpHNL-atpHSM	NG	NA	NA	NA	NA	243	67.3866	175.613	NA	0	NA	NA	NA	NA	NA	1:1:1:1:1:1	0.477366(0.641975:0.493827:0.296296)	NA	NA	NA	NA
atpINL-atpISM	NG	0.00177782	0.0286546	0.0620432	0.00350174	741	177.847	563.153	NA	6	5	1	NA	NA	0.00822849	1:1:1:1:1:1	0.369771(0.487854:0.368421:0.253036)	NA	NA	NA	NA
ccsANL-ccsASM	NG	0.0120408	0.0578533	0.208126	0.00047508	969	215.524	753.476	NA	21	12	9	NA	NA	0.0222304	1:1:1:1:1:1	0.334881(0.349845:0.379257:0.275542)	NA	NA	NA	NA
cemANL-cemASM	NG	0.00731295	0.0494223	0.147969	0.00245973	696	146.354	549.646	NA	11	7	4	NA	NA	0.0161677	1:1:1:1:1:1	0.336925(0.394397:0.280172:0.336207)	NA	NA	NA	NA
clpPNL-clpPSM	NG	NA	0.0453226	0	NA	555	136.425	418.575	NA	6	6	NA	NA	NA	0.0111407	1:1:1:1:1:1	0.424324(0.562162:0.378378:0.332432)	NA	NA	NA	NA
matKNL-matKSM	NG	0.0109836	0.0438458	0.250504	0.000471086	1521	328.725	1192.27	NA	27	14	13	NA	NA	0.0180859	1:1:1:1:1:1	0.349441(0.418146:0.316568:0.313609)	NA	NA	NA	NA
ndhANL-ndhASM	NG	0.00735017	0.046047	0.159623	2.47912e-05	1089	268.685	820.315	NA	18	12	6	NA	NA	0.0168977	1:1:1:1:1:1	0.351699(0.440771:0.392562:0.221763)	NA	NA	NA	NA
ndhBNL-ndhBSM	NG	0.0021596	0.00694367	0.311017	0.0899943	1521	361.71	1159.29	NA	5	2.5	2.5	NA	NA	0.0032973	1:1:1:1:1:1	0.37574(0.418146:0.384615:0.324458)	NA	NA	NA	NA
ndhCNL-ndhCSM	NG	NA	0.0121036	0	NA	360	83.2887	276.711	NA	1	1	NA	NA	NA	0.00280025	1:1:1:1:1:1	0.354167(0.470833:0.333333:0.258333)	NA	NA	NA	NA
ndhDNL-ndhDSM	NG	0.00957428	0.0609492	0.157086	4.09514e-07	1515	358.739	1156.26	NA	32	21	11	NA	NA	0.0217394	1:1:1:1:1:1	0.366997(0.409901:0.372277:0.318812)	NA	NA	NA	NA
ndhENL-ndhESM	NG	0.00433035	0.0141371	0.30631	0.36144	303	71.4044	231.596	NA	2	1	1	NA	NA	0.0066414	1:1:1:1:1:1	0.336634(0.40099:0.356436:0.252475)	NA	NA	NA	NA
ndhFNL-ndhFSM	NG	0.0168053	0.0568753	0.295476	1.04273e-05	2238	492.95	1745.05	NA	56	27	29	NA	NA	0.0256313	1:1:1:1:1:1	0.326631(0.375335:0.353887:0.25067)	NA	NA	NA	NA
ndhGNL-ndhGSM	NG	0.00247859	0.0395209	0.062716	0.0036771	534	129.878	404.122	NA	6	5	1	NA	NA	0.0114879	1:1:1:1:1:1	0.346442(0.432584:0.356742:0.25)	NA	NA	NA	NA
ndhHNL-ndhHSM	NG	0.00655767	0.0354347	0.185063	0.00153909	1179	260.035	918.965	NA	15	9	6	NA	NA	0.0129267	1:1:1:1:1:1	0.390585(0.520356:0.367684:0.283715)	NA	NA	NA	NA
ndhINL-ndhISM	NG	0.00514462	0.0659291	0.0780327	0.000536208	501	110.91	390.09	NA	9	7	2	NA	NA	0.0186009	1:1:1:1:1:1	0.370259(0.44012:0.38024:0.290419)	NA	NA	NA	NA
ndhJNL-ndhJSM	NG	0.00819314	0.0191393	0.42808	0.310225	474	105.836	368.164	NA	5	2	3	NA	NA	0.0106372	1:1:1:1:1:1	0.405063(0.53481:0.367089:0.313291)	NA	NA	NA	NA
ndhKNL-ndhKSM	NG	0.00574442	0.0313687	0.183126	0.0210401	687	162.751	524.249	NA	8	5	3	NA	NA	0.0118148	1:1:1:1:1:1	0.388646(0.445415:0.432314:0.28821)	NA	NA	NA	NA
petANL-petASM	NG	0.00273741	0.0313412	0.0873421	0.000907855	960	228.047	731.953	NA	9	7	2	NA	NA	0.00953222	1:1:1:1:1:1	0.405208(0.529687:0.36875:0.317188)	NA	NA	NA	NA
petBNL-petBSM	NG	0.00204785	0.0394789	0.051872	0.000996344	645	156.015	488.985	NA	7	6	1	NA	NA	0.0111018	1:1:1:1:1:1	0.409302(0.495349:0.418605:0.313953)	NA	NA	NA	NA
petDNL-petDSM	NG	0.0166988	0.0261627	0.638267	0.379762	480	116.678	363.322	NA	9	3	6	NA	NA	0.0189993	1:1:1:1:1:1	0.389583(0.503125:0.3875:0.278125)	NA	NA	NA	NA
petGNL-petGSM	NG	NA	0.0376451	0	NA	111	27.2361	83.7639	NA	1	1	NA	NA	NA	0.009237	1:1:1:1:1:1	0.369369(0.513514:0.297297:0.297297)	NA	NA	NA	NA
petLNL-petLSM	NG	NA	NA	NA	NA	93	24.3491	68.6509	NA	0	NA	NA	NA	NA	NA	1:1:1:1:1:1	0.354839(0.354839:0.451613:0.258065)	NA	NA	NA	NA
petNNL-petNSM	NG	NA	NA	NA	NA	87	20.6498	66.3502	NA	0	NA	NA	NA	NA	NA	1:1:1:1:1:1	0.436782(0.482759:0.448276:0.37931)	NA	NA	NA	NA
psaANL-psaASM	NG	NA	0.0369956	0	NA	2250	526.345	1723.66	NA	19	19	NA	NA	NA	0.00865443	1:1:1:1:1:1	0.432222(0.526667:0.436:0.334)	NA	NA	NA	NA
psaBNL-psaBSM	NG	0.00235669	0.0304898	0.0772945	3.01865e-07	2202	502.036	1699.96	NA	19	15	4	NA	NA	0.00877078	1:1:1:1:1:1	0.415531(0.490463:0.431199:0.324932)	NA	NA	NA	NA
psaCNL-psaCSM	NG	NA	0.0756983	0	NA	243	55.5528	187.447	NA	4	4	NA	NA	NA	0.0173056	1:1:1:1:1:1	0.407407(0.45679:0.530864:0.234568)	NA	NA	NA	NA
psaINL-psaISM	NG	0.0118787	NA	NA	NA	111	26.1474	84.8526	NA	1	NA	1	NA	NA	0.00908054	1:1:1:1:1:1	0.351351(0.459459:0.27027:0.324324)	NA	NA	NA	NA
psaJNL-psaJSM	NG	NA	0.0324618	0	NA	132	31.4769	100.523	NA	1	1	NA	NA	NA	0.00774089	1:1:1:1:1:1	0.390152(0.409091:0.409091:0.352273)	NA	NA	NA	NA
psbANL-psbASM	NG	0.00123373	0.0204554	0.060313	0.003139	1059	247.782	811.218	NA	6	5	1	NA	NA	0.00573118	1:1:1:1:1:1	0.423985(0.504249:0.434844:0.332861)	NA	NA	NA	NA
psbBNL-psbBSM	NG	0.00172302	0.0310268	0.0555333	5.82179e-06	1524	361.916	1162.08	NA	13	11	2	NA	NA	0.00868202	1:1:1:1:1:1	0.435367(0.544291:0.459646:0.302165)	NA	NA	NA	NA
psbCNL-psbCSM	NG	0.0018664	0.020504	0.0910263	0.00109911	1419	346.085	1072.91	NA	9	7	2	NA	NA	0.00641199	1:1:1:1:1:1	0.443975(0.536998:0.458774:0.336152)	NA	NA	NA	NA
psbDNL-psbDSM	NG	0.00247102	0.0287372	0.0859867	0.000837571	1059	248.283	810.717	NA	9	7	2	NA	NA	0.00862914	1:1:1:1:1:1	0.425873(0.524079:0.433428:0.320113)	NA	NA	NA	NA
psbENL-psbESM	NG	NA	0.0176409	0	NA	249	57.3559	191.644	NA	1	1	NA	NA	NA	0.00406348	1:1:1:1:1:1	0.415663(0.433735:0.481928:0.331325)	NA	NA	NA	NA
psbFNL-psbFSM	NG	0.0115915	NA	NA	NA	117	30.0613	86.9387	NA	1	NA	1	NA	NA	0.00861323	1:1:1:1:1:1	0.41453(0.487179:0.423077:0.333333)	NA	NA	NA	NA
psbHNL-psbHSM	NG	0.018748	NA	NA	NA	219	56.9742	162.026	NA	3	NA	3	NA	NA	0.0138706	1:1:1:1:1:1	0.417808(0.472603:0.479452:0.30137)	NA	NA	NA	NA
psbINL-psbISM	NG	NA	NA	NA	NA	108	26.8302	81.1698	NA	0	NA	NA	NA	NA	NA	1:1:1:1:1:1	0.398148(0.527778:0.305556:0.361111)	NA	NA	NA	NA
psbJNL-psbJSM	NG	0.0114447	NA	NA	NA	120	31.9547	88.0453	NA	1	NA	1	NA	NA	0.00839708	1:1:1:1:1:1	0.404167(0.3875:0.5:0.325)	NA	NA	NA	NA
psbKNL-psbKSM	NG	NA	0.0251811	0	NA	183	40.3827	142.617	NA	1	1	NA	NA	NA	0.00555673	1:1:1:1:1:1	0.338798(0.409836:0.327869:0.278689)	NA	NA	NA	NA
psbLNL-psbLSM	NG	NA	0.0435758	0	NA	114	23.6216	90.3784	NA	1	1	NA	NA	NA	0.00902923	1:1:1:1:1:1	0.337719(0.368421:0.263158:0.381579)	NA	NA	NA	NA
psbMNL-psbMSM	NG	NA	NA	NA	NA	102	24.7375	77.2625	NA	0	NA	NA	NA	NA	NA	1:1:1:1:1:1	0.323529(0.470588:0.294118:0.205882)	NA	NA	NA	NA
psbNNL-psbNSM	NG	0.0104078	0.031667	0.328664	0.37793	129	32.25	96.75	NA	2	1	1	NA	NA	0.0157226	1:1:1:1:1:1	0.44186(0.581395:0.430233:0.313953)	NA	NA	NA	NA
psbTNL-psbTSM	NG	NA	NA	NA	NA	105	23.9414	81.0586	NA	0	NA	NA	NA	NA	NA	1:1:1:1:1:1	0.361905(0.4:0.314286:0.371429)	NA	NA	NA	NA
psbZNL-psbZSM	NG	NA	0.021543	0	NA	186	47.0886	138.911	NA	1	1	NA	NA	NA	0.00545393	1:1:1:1:1:1	0.357527(0.387097:0.419355:0.266129)	NA	NA	NA	NA
rbcLNL-rbcLSM	NG	0.0083477	0.045352	0.184065	5.51831e-05	1425	340.847	1084.15	NA	24	15	9	NA	NA	0.0171988	1:1:1:1:1:1	0.44386(0.576842:0.438947:0.315789)	NA	NA	NA	NA
rpl14NL-rpl14SM	NG	NA	0.0840207	0	NA	366	88.0666	277.933	NA	7	7	NA	NA	NA	0.020217	1:1:1:1:1:1	0.405738(0.540984:0.385246:0.290984)	NA	NA	NA	NA
rpl16NL-rpl16SM	NG	0.00754394	0.0455283	0.165698	0.0379908	357	90.551	266.449	NA	6	4	2	NA	NA	0.0171785	1:1:1:1:1:1	0.436975(0.52521:0.52521:0.260504)	NA	NA	NA	NA
rpl20NL-rpl20SM	NG	0.0207184	0.0339488	0.610283	0.357945	384	90.3834	293.617	NA	9	3	6	NA	NA	0.0238325	1:1:1:1:1:1	0.369792(0.382812:0.457031:0.269531)	NA	NA	NA	NA
rpl22NL-rpl22SM	NG	NA	0.00951083	0	NA	486	105.811	380.189	NA	1	1	NA	NA	NA	0.00207069	1:1:1:1:1:1	0.361111(0.407407:0.376543:0.299383)	NA	NA	NA	NA
rpl23NL-rpl23SM	NG	NA	NA	NA	NA	279	63.0783	215.922	NA	0	NA	NA	NA	NA	NA	1:1:1:1:1:1	0.383513(0.430108:0.408602:0.311828)	NA	NA	NA	NA
rpl2NL-rpl2SM	NG	NA	NA	NA	NA	822	202.647	619.353	NA	0	NA	NA	NA	NA	NA	1:1:1:1:1:1	0.441606(0.514599:0.489051:0.321168)	NA	NA	NA	NA
rpl32NL-rpl32SM	NG	0.00814797	0.0583915	0.13954	0.115626	159	35.6022	123.398	NA	3	2	1	NA	NA	0.0193982	1:1:1:1:1:1	0.330189(0.292453:0.471698:0.226415)	NA	NA	NA	NA
rpl33NL-rpl33SM	NG	0.0130411	0.0476711	0.273564	0.206687	198	43.3016	154.698	NA	4	2	2	NA	NA	0.0206145	1:1:1:1:1:1	0.368687(0.386364:0.401515:0.318182)	NA	NA	NA	NA
rpl36NL-rpl36SM	NG	NA	0.0379144	0	NA	111	27.0475	83.9525	NA	1	1	NA	NA	NA	0.00923864	1:1:1:1:1:1	0.40991(0.459459:0.486486:0.283784)	NA	NA	NA	NA
rpoANL-rpoASM	NG	0.0227682	0.0186674	1.21968	0.995244	975	216.955	758.045	NA	21	4	17	NA	NA	0.0218557	1:1:1:1:1:1	0.362564(0.476923:0.326154:0.284615)	NA	NA	NA	NA
rpoBNL-rpoBSM	NG	0.00448366	0.021663	0.206973	6.22057e-05	3210	749.306	2460.69	NA	27	16	11	NA	NA	0.0084938	1:1:1:1:1:1	0.398287(0.506542:0.378972:0.309346)	NA	NA	NA	NA
rpoC1NL-rpoC1SM	NG	0.00640432	0.0391497	0.163585	5.02981e-07	2040	471.878	1568.12	NA	28	18	10	NA	NA	0.0139787	1:1:1:1:1:1	0.38799(0.505882:0.381618:0.276471)	NA	NA	NA	NA
rpoC2NL-rpoC2SM	NG	0.0100484	0.0320271	0.313748	9.74834e-06	4074	951.533	3122.47	NA	61	29.8333	31.1667	NA	NA	0.0151818	1:1:1:1:1:1	0.389666(0.474595:0.380339:0.314065)	NA	NA	NA	NA
rps11NL-rps11SM	NG	0.0049487	0.0421109	0.117516	0.00549141	414	109.889	304.111	NA	6	4.5	1.5	NA	NA	0.0148127	1:1:1:1:1:1	0.475845(0.543478:0.597826:0.286232)	NA	NA	NA	NA
rps12NL-rps12SM	NG	0.0207239	0.0181237	1.14347	0.884249	354	93.0761	260.924	NA	7	1.66667	5.33333	NA	NA	0.0200402	1:1:1:1:1:1	0.45339(0.533898:0.512712:0.313559)	NA	NA	NA	NA
rps14NL-rps14SM	NG	0.008646	0.0303025	0.285323	0.216208	300	67.3434	232.657	NA	4	2	2	NA	NA	0.0135074	1:1:1:1:1:1	0.416667(0.46:0.45:0.34)	NA	NA	NA	NA
rps15NL-rps15SM	NG	0.0184769	0.0341927	0.540374	0.380384	279	59.8354	219.165	NA	6	2	4	NA	NA	0.0218474	1:1:1:1:1:1	0.318996(0.392473:0.274194:0.290323)	NA	NA	NA	NA
rps16NL-rps16SM	NG	0.0050344	0.0315675	0.159481	0.135457	264	64.6991	199.301	NA	3	2	1	NA	NA	0.0115369	1:1:1:1:1:1	0.378788(0.534091:0.363636:0.238636)	NA	NA	NA	NA
rps18NL-rps18SM	NG	0.00780632	0.0133703	0.583857	0.527359	333	75.4615	257.538	NA	3	1	2	NA	NA	0.00906717	1:1:1:1:1:1	0.339339(0.351351:0.405405:0.261261)	NA	NA	NA	NA
rps19NL-rps19SM	NG	NA	NA	NA	NA	276	63.9554	212.045	NA	0	NA	NA	NA	NA	NA	1:1:1:1:1:1	0.358696(0.434783:0.402174:0.23913)	NA	NA	NA	NA
rps2NL-rps2SM	NG	0.00921983	0.0509694	0.180889	0.00290018	708	162.351	545.649	NA	13	8	5	NA	NA	0.0187934	1:1:1:1:1:1	0.385593(0.434322:0.423729:0.298729)	NA	NA	NA	NA
rps3NL-rps3SM	NG	0.00393229	0.00669399	0.587435	0.527797	660	150.055	509.945	NA	3	1	2	NA	NA	0.00456018	1:1:1:1:1:1	0.346212(0.479545:0.336364:0.222727)	NA	NA	NA	NA
rps4NL-rps4SM	NG	0.0109585	0.0140793	0.778338	0.525037	603	143.39	459.61	NA	7	2	5	NA	NA	0.0117006	1:1:1:1:1:1	0.382255(0.527363:0.368159:0.251244)	NA	NA	NA	NA
rps7NL-rps7SM	NG	NA	NA	NA	NA	465	114.435	350.565	NA	0	NA	NA	NA	NA	NA	1:1:1:1:1:1	0.412903(0.535484:0.451613:0.251613)	NA	NA	NA	NA
rps8NL-rps8SM	NG	0.0100024	0.0305951	0.32693	0.166031	402	100.069	301.931	NA	6	3	3	NA	NA	0.0151285	1:1:1:1:1:1	0.375622(0.440299:0.414179:0.272388)	NA	NA	NA	NA
ycf1NL-ycf1SM	NG	0.0233851	0.0438219	0.53364	0.000474962	5628	1147.23	4480.77	NA	152	48.8333	103.167	NA	NA	0.027551	1:1:1:1:1:1	0.304815(0.355544:0.290245:0.268657)	NA	NA	NA	NA
ycf2NL-ycf2SM	NG	0.00280297	0.00403629	0.694442	0.425393	6852	1490.52	5361.48	NA	21	6	15	NA	NA	0.00307125	1:1:1:1:1:1	0.379086(0.418783:0.344133:0.374343)	NA	NA	NA	NA
ycf3NL-ycf3SM	NG	0.00513402	0.0270039	0.190122	0.0768637	504	113.107	390.893	NA	5	3	2	NA	NA	0.010042	1:1:1:1:1:1	0.405754(0.479167:0.392857:0.345238)	NA	NA	NA	NA
ycf4NL-ycf4SM	NG	0.00234462	0.0411657	0.0569556	0.00260159	552	124.824	427.176	NA	6	5	1	NA	NA	0.0111233	1:1:1:1:1:1	0.376812(0.413043:0.394022:0.32337)	NA	NA	NA	NA

## Sheet: NL_DV
Sequence	Method	Ka	Ks	Ka/Ks	P-Value(Fisher)	Length	S-Sites	N-Sites	Fold-Sites(0:2:4)	Substitutions	S-Substitutions	N-Substitutions	Fold-S-Substitutions(0:2:4)	Fold-N-Substitutions(0:2:4)	Divergence-Time	Substitution-Rate-Ratio(rTC:rAG:rTA:rCG:rTG:rCA/rCA)	GC(1:2:3)	ML-Score	AICc	Akaike-Weight	Model
accDNL-accDDV	NG	0.0498539	0.145232	0.34327	1.22702e-06	1488	301.054	1186.95	NA	97	39.75	57.25	NA	NA	0.069151	1:1:1:1:1:1	0.352151(0.396169:0.368952:0.291331)	NA	NA	NA	NA
atpANL-atpADV	NG	0.00962092	0.0887654	0.108386	9.78654e-12	1521	370.309	1150.69	NA	42	31	11	NA	NA	0.0288898	1:1:1:1:1:1	0.405654(0.545365:0.394477:0.27712)	NA	NA	NA	NA
atpBNL-atpBDV	NG	0.00807607	0.140934	0.0573038	1.1073e-21	1494	373.586	1120.41	NA	57	48	9	NA	NA	0.0412983	1:1:1:1:1:1	0.438755(0.570281:0.413655:0.332329)	NA	NA	NA	NA
atpENL-atpEDV	NG	0.00659502	0.139279	0.0473511	1.02944e-06	399	94.4055	304.595	NA	14	12	2	NA	NA	0.0379887	1:1:1:1:1:1	0.408521(0.503759:0.413534:0.308271)	NA	NA	NA	NA
atpFNL-atpFDV	NG	0.0190523	0.101208	0.18825	0.00031067	552	126.748	425.252	NA	20	12	8	NA	NA	0.0379165	1:1:1:1:1:1	0.396739(0.486413:0.336957:0.366848)	NA	NA	NA	NA
atpHNL-atpHDV	NG	NA	0.165566	0	NA	243	67.3107	175.689	NA	10	10	NA	NA	NA	0.0458615	1:1:1:1:1:1	0.473251(0.641975:0.493827:0.283951)	NA	NA	NA	NA
atpINL-atpIDV	NG	0.0207456	0.117738	0.176201	1.23038e-06	741	178.962	562.038	NA	31	19.5	11.5	NA	NA	0.0441706	1:1:1:1:1:1	0.375843(0.493927:0.366397:0.267206)	NA	NA	NA	NA
ccsANL-ccsADV	NG	0.0539481	0.116137	0.464522	0.00652876	963	213.771	749.229	NA	62	23	39	NA	NA	0.067753	1:1:1:1:1:1	0.33541(0.356698:0.370717:0.278816)	NA	NA	NA	NA
cemANL-cemADV	NG	0.0374169	0.140767	0.265807	7.95581e-05	696	148.038	547.962	NA	39	19	20	NA	NA	0.0593992	1:1:1:1:1:1	0.335489(0.396552:0.284483:0.325431)	NA	NA	NA	NA
clpPNL-clpPDV	NG	0.049913	0.0484084	1.03108	0.997572	438	106.657	331.343	NA	21	5	16	NA	NA	0.0495466	1:1:1:1:1:1	0.444064(0.578767:0.40411:0.349315)	NA	NA	NA	NA
matKNL-matKDV	NG	0.0684685	0.119413	0.573374	0.00639201	1515	330.64	1184.36	NA	114	36.5	77.5	NA	NA	0.0795869	1:1:1:1:1:1	0.348515(0.410891:0.322772:0.311881)	NA	NA	NA	NA
ndhANL-ndhADV	NG	0.0337567	0.0996065	0.3389	0.000196026	1086	268.023	817.977	NA	52	25	27	NA	NA	0.0500083	1:1:1:1:1:1	0.35221(0.435083:0.403315:0.218232)	NA	NA	NA	NA
ndhBNL-ndhBDV	NG	0.00650574	0.0237783	0.2736	0.00516403	1521	363.165	1157.84	NA	16	8.5	7.5	NA	NA	0.0106299	1:1:1:1:1:1	0.377055(0.421105:0.386588:0.323471)	NA	NA	NA	NA
ndhCNL-ndhCDV	NG	0.0109139	0.103011	0.105949	0.00054166	360	83.1166	276.883	NA	11	8	3	NA	NA	0.0321774	1:1:1:1:1:1	0.361111(0.4625:0.3375:0.283333)	NA	NA	NA	NA
ndhDNL-ndhDDV	NG	0.032325	0.169393	0.190828	6.20406e-15	1494	356.139	1137.86	NA	90	54	36	NA	NA	0.0649993	1:1:1:1:1:1	0.368139(0.413655:0.378514:0.312249)	NA	NA	NA	NA
ndhENL-ndhEDV	NG	0.0130668	0.155019	0.0842915	3.40083e-06	303	71.4044	231.596	NA	13	10	3	NA	NA	0.046519	1:1:1:1:1:1	0.341584(0.39604:0.356436:0.272277)	NA	NA	NA	NA
ndhFNL-ndhFDV	NG	0.0691063	0.172495	0.400628	4.80994e-09	2220	493.2	1726.8	NA	190	76	114	NA	NA	0.0920753	1:1:1:1:1:1	0.325901(0.374324:0.352703:0.250676)	NA	NA	NA	NA
ndhGNL-ndhGDV	NG	0.0303239	0.171855	0.17645	2.42956e-06	534	130.219	403.781	NA	32	20	12	NA	NA	0.0648372	1:1:1:1:1:1	0.350187(0.44382:0.356742:0.25)	NA	NA	NA	NA
ndhHNL-ndhHDV	NG	0.0209586	0.116387	0.180078	1.37841e-08	1179	259.727	919.273	NA	47	28	19	NA	NA	0.0419809	1:1:1:1:1:1	0.38592(0.516539:0.367684:0.273537)	NA	NA	NA	NA
ndhINL-ndhIDV	NG	0.0207718	0.183645	0.113109	1.50237e-07	501	110.505	390.495	NA	26	18	8	NA	NA	0.0566964	1:1:1:1:1:1	0.362275(0.446108:0.374251:0.266467)	NA	NA	NA	NA
ndhJNL-ndhJDV	NG	0.0137337	0.144395	0.0951124	1.72372e-06	474	106.589	367.411	NA	19	14	5	NA	NA	0.0431157	1:1:1:1:1:1	0.408228(0.53481:0.370253:0.31962)	NA	NA	NA	NA
ndhKNL-ndhKDV	NG	0.0292677	0.104227	0.280808	0.000584016	687	164.425	522.575	NA	31	16	15	NA	NA	0.0472083	1:1:1:1:1:1	0.394469(0.451965:0.438865:0.292576)	NA	NA	NA	NA
petANL-petADV	NG	0.0158819	0.126161	0.125886	3.81055e-10	960	228.211	731.789	NA	38	26.5	11.5	NA	NA	0.0420974	1:1:1:1:1:1	0.401562(0.529687:0.364063:0.310937)	NA	NA	NA	NA
petBNL-petBDV	NG	0.00274046	0.166687	0.0164407	6.65426e-11	486	120.431	365.569	NA	19	18	1	NA	NA	0.0433665	1:1:1:1:1:1	0.418724(0.487654:0.435185:0.333333)	NA	NA	NA	NA
petDNL-petDDV	NG	0.0139359	0.139456	0.0999307	1.69556e-06	480	117.871	362.129	NA	20	15	5	NA	NA	0.0447591	1:1:1:1:1:1	0.392708(0.509375:0.3875:0.28125)	NA	NA	NA	NA
petGNL-petGDV	NG	0.0120592	0.118321	0.10192	0.0427776	111	27.4074	83.5926	NA	4	3	1	NA	NA	0.0382966	1:1:1:1:1:1	0.369369(0.513514:0.310811:0.283784)	NA	NA	NA	NA
petLNL-petLDV	NG	0.0453697	0.0851143	0.533044	0.403368	93	24.8564	68.1436	NA	5	2	3	NA	NA	0.0559923	1:1:1:1:1:1	0.360215(0.403226:0.435484:0.241935)	NA	NA	NA	NA
petNNL-petNDV	NG	NA	0.0500608	0	NA	87	20.6498	66.3502	NA	1	1	NA	NA	NA	0.0118821	1:1:1:1:1:1	0.442529(0.482759:0.448276:0.396552)	NA	NA	NA	NA
psaANL-psaADV	NG	0.00407198	0.0907881	0.0448515	9.53717e-24	2250	526.265	1723.74	NA	52	45	7	NA	NA	0.0243545	1:1:1:1:1:1	0.434889(0.528:0.436:0.340667)	NA	NA	NA	NA
psaBNL-psaBDV	NG	0.00768605	0.10918	0.0703979	1.5023e-22	2202	501.943	1700.06	NA	64	51	13	NA	NA	0.0308215	1:1:1:1:1:1	0.415304(0.48842:0.43188:0.325613)	NA	NA	NA	NA
psaCNL-psaCDV	NG	NA	0.138058	0	NA	243	55.5129	187.487	NA	7	7	NA	NA	NA	0.0315392	1:1:1:1:1:1	0.41358(0.45679:0.530864:0.253086)	NA	NA	NA	NA
psaINL-psaIDV	NG	0.0361251	NA	NA	NA	111	25.9393	85.0607	NA	3	NA	3	NA	NA	0.0276832	1:1:1:1:1:1	0.346847(0.459459:0.27027:0.310811)	NA	NA	NA	NA
psaJNL-psaJDV	NG	0.0754919	0.212691	0.354938	0.0522686	132	31.0488	100.951	NA	13	5.75	7.25	NA	NA	0.107764	1:1:1:1:1:1	0.382576(0.409091:0.397727:0.340909)	NA	NA	NA	NA
psbANL-psbADV	NG	0.00246729	0.127653	0.0193281	3.65521e-17	1059	247.06	811.94	NA	31	29	2	NA	NA	0.0316725	1:1:1:1:1:1	0.424929(0.501416:0.436261:0.33711)	NA	NA	NA	NA
psbBNL-psbBDV	NG	0.00865436	0.113141	0.0764918	2.36565e-16	1524	361.834	1162.17	NA	48	38	10	NA	NA	0.033462	1:1:1:1:1:1	0.436024(0.54626:0.458661:0.30315)	NA	NA	NA	NA
psbCNL-psbCDV	NG	0.00280123	0.105315	0.0265986	1.50099e-18	1419	346.039	1072.96	NA	37	34	3	NA	NA	0.0278003	1:1:1:1:1:1	0.443622(0.539112:0.459831:0.331924)	NA	NA	NA	NA
psbDNL-psbDDV	NG	0.00247102	0.0852161	0.0289971	1.98394e-11	1059	248.283	810.717	NA	22	20	2	NA	NA	0.0218707	1:1:1:1:1:1	0.426818(0.524079:0.433428:0.322946)	NA	NA	NA	NA
psbENL-psbEDV	NG	0.00523154	0.113029	0.0462849	0.000656801	249	57.1841	191.816	NA	7	6	1	NA	NA	0.0299878	1:1:1:1:1:1	0.411647(0.433735:0.475904:0.325301)	NA	NA	NA	NA
psbFNL-psbFDV	NG	0.0115744	0.0341735	0.338696	0.384062	117	29.9342	87.0658	NA	2	1	1	NA	NA	0.0173563	1:1:1:1:1:1	0.410256(0.474359:0.435897:0.320513)	NA	NA	NA	NA
psbHNL-psbHDV	NG	0.0445457	0.113112	0.39382	0.0891723	219	57.1453	161.855	NA	13	6	7	NA	NA	0.0624372	1:1:1:1:1:1	0.408676(0.458904:0.479452:0.287671)	NA	NA	NA	NA
psbINL-psbIDV	NG	0.0248549	0.273352	0.090926	0.00243268	108	26.1921	81.8079	NA	8	6	2	NA	NA	0.0851204	1:1:1:1:1:1	0.398148(0.513889:0.291667:0.388889)	NA	NA	NA	NA
psbJNL-psbJDV	NG	0.0230667	0.031966	0.721601	0.591063	120	31.9547	88.0453	NA	3	1	2	NA	NA	0.0254365	1:1:1:1:1:1	0.408333(0.3875:0.5125:0.325)	NA	NA	NA	NA
psbKNL-psbKDV	NG	0.00705322	0.263135	0.0268045	4.94713e-06	183	40.5531	142.447	NA	10	9	1	NA	NA	0.0638014	1:1:1:1:1:1	0.349727(0.418033:0.327869:0.303279)	NA	NA	NA	NA
psbLNL-psbLDV	NG	NA	0.139148	0	NA	114	23.6216	90.3784	NA	3	3	NA	NA	NA	0.0288324	1:1:1:1:1:1	0.337719(0.368421:0.263158:0.381579)	NA	NA	NA	NA
psbMNL-psbMDV	NG	NA	0.0855473	0	NA	102	24.7375	77.2625	NA	2	2	NA	NA	NA	0.0207474	1:1:1:1:1:1	0.323529(0.470588:0.294118:0.205882)	NA	NA	NA	NA
psbNNL-psbNDV	NG	0.0103708	0.175787	0.0589962	0.00338423	129	31.9069	97.0931	NA	6	5	1	NA	NA	0.0512849	1:1:1:1:1:1	0.434109(0.569767:0.430233:0.302326)	NA	NA	NA	NA
psbTNL-psbTDV	NG	0.0253056	0.0417492	0.606135	0.543752	105	24.6254	80.3746	NA	3	1	2	NA	NA	0.0291621	1:1:1:1:1:1	0.366667(0.414286:0.328571:0.357143)	NA	NA	NA	NA
psbZNL-psbZDV	NG	0.0145199	0.114937	0.126329	0.0117935	186	46.9204	139.08	NA	7	5	2	NA	NA	0.0398512	1:1:1:1:1:1	0.362903(0.395161:0.419355:0.274194)	NA	NA	NA	NA
rbcLNL-rbcLDV	NG	0.00555632	0.0771149	0.0720525	2.55463e-11	1425	341.144	1083.86	NA	31	25	6	NA	NA	0.0226874	1:1:1:1:1:1	0.444912(0.577895:0.438947:0.317895)	NA	NA	NA	NA
rpl14NL-rpl14DV	NG	0.0145249	0.150624	0.0964317	1.52151e-05	366	87.9362	278.064	NA	16	12	4	NA	NA	0.0472245	1:1:1:1:1:1	0.400273(0.54918:0.377049:0.27459)	NA	NA	NA	NA
rpl16NL-rpl16DV	NG	0.0306672	0.0692008	0.443163	0.190359	357	90.7656	266.234	NA	14	6	8	NA	NA	0.0404642	1:1:1:1:1:1	0.434174(0.521008:0.52521:0.256303)	NA	NA	NA	NA
rpl20NL-rpl20DV	NG	0.0344312	0.174354	0.197479	0.000261141	351	83.5632	267.437	NA	22	13	9	NA	NA	0.0677428	1:1:1:1:1:1	0.366097(0.384615:0.444444:0.269231)	NA	NA	NA	NA
rpl22NL-rpl22DV	NG	0.0433112	0.15713	0.27564	0.0006199	486	105.811	380.189	NA	31	15	16	NA	NA	0.0680917	1:1:1:1:1:1	0.358025(0.401235:0.376543:0.296296)	NA	NA	NA	NA
rpl23NL-rpl23DV	NG	0.0187308	NA	NA	NA	279	62.7707	216.229	NA	4	NA	4	NA	NA	0.0145167	1:1:1:1:1:1	0.38172(0.424731:0.408602:0.311828)	NA	NA	NA	NA
rpl2NL-rpl2DV	NG	0.00161588	0.00994343	0.162507	0.137006	822	202.474	619.526	NA	3	2	1	NA	NA	0.00366711	1:1:1:1:1:1	0.441606(0.514599:0.489051:0.321168)	NA	NA	NA	NA
rpl32NL-rpl32DV	NG	0.0723996	0.372201	0.194518	0.00126241	150	34.083	115.917	NA	18	10	8	NA	NA	0.140521	1:1:1:1:1:1	0.333333(0.3:0.45:0.25)	NA	NA	NA	NA
rpl33NL-rpl33DV	NG	0.039937	0.124061	0.321914	0.067606	198	43.7279	154.272	NA	11	5	6	NA	NA	0.0585156	1:1:1:1:1:1	0.356061(0.371212:0.401515:0.295455)	NA	NA	NA	NA
rpl36NL-rpl36DV	NG	0.0120071	0.0778481	0.154238	0.133323	111	27.0475	83.9525	NA	3	2	1	NA	NA	0.0280506	1:1:1:1:1:1	0.400901(0.445946:0.486486:0.27027)	NA	NA	NA	NA
rpoANL-rpoADV	NG	0.0644425	0.128677	0.500809	0.00805708	981	219.885	761.115	NA	73	26	47	NA	NA	0.0788402	1:1:1:1:1:1	0.363914(0.475535:0.330275:0.285933)	NA	NA	NA	NA
rpoBNL-rpoBDV	NG	0.0239786	0.103913	0.230756	3.93161e-16	3210	752.3	2457.7	NA	131	73	58	NA	NA	0.0427121	1:1:1:1:1:1	0.402492(0.509813:0.380841:0.316822)	NA	NA	NA	NA
rpoC1NL-rpoC1DV	NG	0.018432	0.112277	0.164165	4.52957e-15	2040	474.697	1565.3	NA	78	49.5	28.5	NA	NA	0.0402692	1:1:1:1:1:1	0.391176(0.509559:0.386029:0.277941)	NA	NA	NA	NA
rpoC2NL-rpoC2DV	NG	0.0330988	0.117765	0.281057	3.05263e-18	4068	943.555	3124.45	NA	204	102.833	101.167	NA	NA	0.0527368	1:1:1:1:1:1	0.383727(0.469395:0.372419:0.309366)	NA	NA	NA	NA
rps11NL-rps11DV	NG	0.0232892	0.057312	0.406359	0.0949031	414	108.741	305.259	NA	13	6	7	NA	NA	0.0322256	1:1:1:1:1:1	0.469807(0.539855:0.597826:0.271739)	NA	NA	NA	NA
rps12NL-rps12DV	NG	0.0246742	0.0404666	0.609742	0.41976	354	93.0761	260.924	NA	10	3.66667	6.33333	NA	NA	0.0288264	1:1:1:1:1:1	0.454802(0.533898:0.508475:0.322034)	NA	NA	NA	NA
rps14NL-rps14DV	NG	0.0307074	0.0618811	0.496232	0.215953	300	67.3434	232.657	NA	11	4	7	NA	NA	0.0377052	1:1:1:1:1:1	0.411667(0.45:0.455:0.33)	NA	NA	NA	NA
rps15NL-rps15DV	NG	0.05623	0.101907	0.551779	0.201399	270	57.7205	212.279	NA	17	5.5	11.5	NA	NA	0.0659948	1:1:1:1:1:1	0.311111(0.366667:0.272222:0.294444)	NA	NA	NA	NA
rps16NL-rps16DV	NG	0.962936	1.76947	0.544194	0.316436	87	20.6145	66.3855	NA	50	14	36	NA	NA	1.15404	1:1:1:1:1:1	0.37931(0.465517:0.344828:0.327586)	NA	NA	NA	NA
rps18NL-rps18DV	NG	0.0277318	0.0984282	0.281746	0.0211114	333	75.8866	257.113	NA	14	7	7	NA	NA	0.0438426	1:1:1:1:1:1	0.340841(0.342342:0.414414:0.265766)	NA	NA	NA	NA
rps19NL-rps19DV	NG	NA	0.0158012	0	NA	276	63.9554	212.045	NA	1	1	NA	NA	NA	0.00366149	1:1:1:1:1:1	0.360507(0.434783:0.402174:0.244565)	NA	NA	NA	NA
rps2NL-rps2DV	NG	0.0318441	0.0913766	0.348492	0.0068247	708	162.735	545.265	NA	31	14	17	NA	NA	0.0455277	1:1:1:1:1:1	0.391949(0.444915:0.427966:0.302966)	NA	NA	NA	NA
rps3NL-rps3DV	NG	0.0239192	0.0994814	0.240439	0.00042896	660	150.269	509.731	NA	26	14	12	NA	NA	0.0411233	1:1:1:1:1:1	0.347727(0.481818:0.338636:0.222727)	NA	NA	NA	NA
rps4NL-rps4DV	NG	0.0266103	0.0577208	0.461018	0.103188	603	144	459	NA	20	8	12	NA	NA	0.0340397	1:1:1:1:1:1	0.384743(0.524876:0.378109:0.251244)	NA	NA	NA	NA
rps7NL-rps7DV	NG	NA	0.0087899	0	NA	465	114.435	350.565	NA	1	1	NA	NA	NA	0.00216316	1:1:1:1:1:1	0.411828(0.535484:0.451613:0.248387)	NA	NA	NA	NA
rps8NL-rps8DV	NG	0.0380062	0.136464	0.278507	0.00291399	393	96.1779	296.822	NA	23	12	11	NA	NA	0.0621014	1:1:1:1:1:1	0.367684(0.435115:0.385496:0.282443)	NA	NA	NA	NA
ycf1NL-ycf1DV	NG	0.0993814	0.145712	0.68204	0.000150062	5469	1116.93	4352.07	NA	553	147.917	405.083	NA	NA	0.108843	1:1:1:1:1:1	0.307369(0.357652:0.292924:0.27153)	NA	NA	NA	NA
ycf2NL-ycf2DV	NG	0.0109152	0.0160851	0.678594	0.102721	6783	1476.71	5306.29	NA	81	23.5	57.5	NA	NA	0.0120407	1:1:1:1:1:1	0.378667(0.415745:0.345201:0.375055)	NA	NA	NA	NA
ycf3NL-ycf3DV	NG	0.0102998	0.0842229	0.122293	0.000342553	504	112.972	391.028	NA	13	9	4	NA	NA	0.0268697	1:1:1:1:1:1	0.405754(0.479167:0.389881:0.348214)	NA	NA	NA	NA
ycf4NL-ycf4DV	NG	0.0463639	0.1297	0.35747	0.00442467	552	123.841	428.159	NA	34	14.75	19.25	NA	NA	0.0650602	1:1:1:1:1:1	0.377717(0.410326:0.399457:0.32337)	NA	NA	NA	NA

## Sheet: NL_EC
Sequence	Method	Ka	Ks	Ka/Ks	P-Value(Fisher)	Length	S-Sites	N-Sites	Fold-Sites(0:2:4)	Substitutions	S-Substitutions	N-Substitutions	Fold-S-Substitutions(0:2:4)	Fold-N-Substitutions(0:2:4)	Divergence-Time	Substitution-Rate-Ratio(rTC:rAG:rTA:rCG:rTG:rCA/rCA)	GC(1:2:3)	ML-Score	AICc	Akaike-Weight	Model
accDNL-accDEC	NG	0.065637	0.146622	0.447662	0.000130336	1464	298.469	1165.53	NA	113	39.75	73.25	NA	NA	0.0821476	1:1:1:1:1:1	0.353484(0.396516:0.372951:0.290984)	NA	NA	NA	NA
atpANL-atpAEC	NG	0.0105017	0.10412	0.100861	7.59264e-14	1521	370.309	1150.69	NA	48	36	12	NA	NA	0.0332945	1:1:1:1:1:1	0.404997(0.544379:0.394477:0.276134)	NA	NA	NA	NA
atpBNL-atpBEC	NG	0.00988911	0.134214	0.0736814	2.90913e-19	1494	374.316	1119.68	NA	57	46	11	NA	NA	0.0410383	1:1:1:1:1:1	0.439759(0.571285:0.415663:0.332329)	NA	NA	NA	NA
atpENL-atpEEC	NG	0.0115827	0.132804	0.0872166	4.17921e-06	399	94.4865	304.514	NA	15	11.5	3.5	NA	NA	0.040289	1:1:1:1:1:1	0.408521(0.503759:0.413534:0.308271)	NA	NA	NA	NA
atpFNL-atpFEC	NG	0.0142464	0.12871	0.110686	1.97572e-06	552	126.827	425.173	NA	21	15	6	NA	NA	0.0405454	1:1:1:1:1:1	0.397645(0.48913:0.336957:0.366848)	NA	NA	NA	NA
atpHNL-atpHEC	NG	NA	0.165826	0	NA	243	67.2164	175.784	NA	10	10	NA	NA	NA	0.0458692	1:1:1:1:1:1	0.477366(0.641975:0.493827:0.296296)	NA	NA	NA	NA
atpINL-atpIEC	NG	0.0170962	0.111228	0.153703	7.24503e-07	741	178.962	562.038	NA	28	18.5	9.5	NA	NA	0.0398305	1:1:1:1:1:1	0.377868(0.493927:0.366397:0.273279)	NA	NA	NA	NA
ccsANL-ccsAEC	NG	0.0496603	0.143925	0.345043	6.72251e-05	963	213.809	749.191	NA	64	28	36	NA	NA	0.0705893	1:1:1:1:1:1	0.340602(0.359813:0.375389:0.286604)	NA	NA	NA	NA
cemANL-cemAEC	NG	0.0387136	0.135771	0.285138	0.000224912	675	144.938	530.062	NA	38	18	20	NA	NA	0.0595541	1:1:1:1:1:1	0.337037(0.408889:0.28:0.322222)	NA	NA	NA	NA
clpPNL-clpPEC	NG	0.063598	0.121906	0.521698	0.0625848	585	142.204	442.796	NA	43	16	27	NA	NA	0.0777718	1:1:1:1:1:1	0.429915(0.569231:0.387179:0.333333)	NA	NA	NA	NA
matKNL-matKEC	NG	0.0772326	0.148516	0.520027	0.000845714	1521	332.131	1188.87	NA	132	44.75	87.25	NA	NA	0.0927984	1:1:1:1:1:1	0.348455(0.411243:0.323471:0.310651)	NA	NA	NA	NA
ndhANL-ndhAEC	NG	0.0375133	0.103427	0.362705	0.000338857	1089	269.118	819.882	NA	56	26	30	NA	NA	0.0538021	1:1:1:1:1:1	0.352158(0.433884:0.398072:0.224518)	NA	NA	NA	NA
ndhBNL-ndhBEC	NG	0.00737635	0.0181239	0.406996	0.0442322	1521	362.993	1158.01	NA	15	6.5	8.5	NA	NA	0.0099413	1:1:1:1:1:1	0.377383(0.421105:0.385602:0.325444)	NA	NA	NA	NA
ndhCNL-ndhCEC	NG	0.00726734	0.0495265	0.146736	0.0275474	360	83.4608	276.539	NA	6	4	2	NA	NA	0.0170645	1:1:1:1:1:1	0.358333(0.470833:0.3375:0.266667)	NA	NA	NA	NA
ndhDNL-ndhDEC	NG	0.0328107	0.157669	0.208098	2.07276e-12	1473	351.62	1121.38	NA	86	50	36	NA	NA	0.0626156	1:1:1:1:1:1	0.369654(0.417515:0.376782:0.314664)	NA	NA	NA	NA
ndhENL-ndhEEC	NG	0.0130862	0.12072	0.108401	5.60615e-05	303	71.7452	231.255	NA	11	8	3	NA	NA	0.0385721	1:1:1:1:1:1	0.344884(0.40099:0.356436:0.277228)	NA	NA	NA	NA
ndhFNL-ndhFEC	NG	0.0692614	0.180964	0.382736	6.55155e-10	2238	495.998	1742	NA	195	79.75	115.25	NA	NA	0.0940175	1:1:1:1:1:1	0.32529(0.375335:0.349196:0.25134)	NA	NA	NA	NA
ndhGNL-ndhGEC	NG	0.0239431	0.147293	0.162554	2.28837e-06	534	130.859	403.141	NA	27	17.5	9.5	NA	NA	0.0541706	1:1:1:1:1:1	0.351124(0.446629:0.356742:0.25)	NA	NA	NA	NA
ndhHNL-ndhHEC	NG	0.0243081	0.116639	0.208404	1.66325e-08	1179	259.207	919.793	NA	50	28	22	NA	NA	0.0446074	1:1:1:1:1:1	0.385496(0.513995:0.367684:0.274809)	NA	NA	NA	NA
ndhINL-ndhIEC	NG	0.0129077	0.207587	0.06218	3.31678e-10	501	110.293	390.707	NA	25	20	5	NA	NA	0.0557655	1:1:1:1:1:1	0.365269(0.443114:0.377246:0.275449)	NA	NA	NA	NA
ndhJNL-ndhJEC	NG	0.0165109	0.167494	0.0985761	3.64619e-07	474	106.589	367.411	NA	22	16	6	NA	NA	0.0504627	1:1:1:1:1:1	0.407173(0.537975:0.370253:0.313291)	NA	NA	NA	NA
ndhKNL-ndhKEC	NG	0.027244	0.0977081	0.278831	0.000814849	687	163.736	523.264	NA	29	15	14	NA	NA	0.044038	1:1:1:1:1:1	0.391557(0.443231:0.438865:0.292576)	NA	NA	NA	NA
petANL-petAEC	NG	0.0172893	0.1259	0.137326	1.02685e-09	960	228.645	731.355	NA	39	26.5	12.5	NA	NA	0.0431574	1:1:1:1:1:1	0.403125(0.53125:0.365625:0.3125)	NA	NA	NA	NA
petBNL-petBEC	NG	0.00719714	0.136397	0.0527659	1.63589e-10	645	156.358	488.642	NA	23	19.5	3.5	NA	NA	0.0385174	1:1:1:1:1:1	0.407752(0.495349:0.413953:0.313953)	NA	NA	NA	NA
petDNL-petDEC	NG	0.0167624	0.159917	0.10482	4.39695e-07	480	118.041	361.959	NA	23	17	6	NA	NA	0.0519668	1:1:1:1:1:1	0.394792(0.509375:0.390625:0.284375)	NA	NA	NA	NA
petGNL-petGEC	NG	0.0120592	0.118321	0.10192	0.0427776	111	27.4074	83.5926	NA	4	3	1	NA	NA	0.0382966	1:1:1:1:1:1	0.369369(0.513514:0.310811:0.283784)	NA	NA	NA	NA
petLNL-petLEC	NG	0.0298639	0.0416416	0.717164	0.591324	93	24.6873	68.3127	NA	3	1	2	NA	NA	0.0329903	1:1:1:1:1:1	0.360215(0.387097:0.435484:0.258065)	NA	NA	NA	NA
petNNL-petNEC	NG	NA	0.0500608	0	NA	87	20.6498	66.3502	NA	1	1	NA	NA	NA	0.0118821	1:1:1:1:1:1	0.442529(0.482759:0.448276:0.396552)	NA	NA	NA	NA
psaANL-psaAEC	NG	0.00582565	0.101483	0.0574051	3.20287e-23	2250	526.778	1723.22	NA	60	50	10	NA	NA	0.0282213	1:1:1:1:1:1	0.434889(0.530667:0.434667:0.339333)	NA	NA	NA	NA
psaBNL-psaBEC	NG	0.00798163	0.112728	0.0708044	9.99188e-24	2202	501.6	1700.4	NA	66	52.5	13.5	NA	NA	0.0318421	1:1:1:1:1:1	0.414396(0.489101:0.43188:0.322207)	NA	NA	NA	NA
psaCNL-psaCEC	NG	NA	0.20601	0	NA	243	55.5129	187.487	NA	10	10	NA	NA	NA	0.0470625	1:1:1:1:1:1	0.411523(0.45679:0.530864:0.246914)	NA	NA	NA	NA
psaINL-psaIEC	NG	0.0362898	NA	NA	NA	111	26.3161	84.6839	NA	3	NA	3	NA	NA	0.0276862	1:1:1:1:1:1	0.355856(0.459459:0.283784:0.324324)	NA	NA	NA	NA
psaJNL-psaJEC	NG	0.0646164	0.256726	0.251694	0.0126883	132	31.0488	100.951	NA	13	6.75	6.25	NA	NA	0.109804	1:1:1:1:1:1	0.382576(0.409091:0.409091:0.329545)	NA	NA	NA	NA
psbANL-psbAEC	NG	0.00246729	0.122869	0.0200806	1.60731e-16	1059	247.06	811.94	NA	30	28	2	NA	NA	0.0305566	1:1:1:1:1:1	0.424929(0.501416:0.436261:0.33711)	NA	NA	NA	NA
psbBNL-psbBEC	NG	0.00865633	0.113053	0.076569	2.43001e-16	1524	362.096	1161.9	NA	48	38	10	NA	NA	0.0334605	1:1:1:1:1:1	0.437664(0.547244:0.458661:0.307087)	NA	NA	NA	NA
psbCNL-psbCEC	NG	0.000933031	0.118543	0.00787079	3.3104e-23	1419	346.558	1072.44	NA	39	38	1	NA	NA	0.0296567	1:1:1:1:1:1	0.445032(0.540169:0.457717:0.337209)	NA	NA	NA	NA
psbDNL-psbDEC	NG	0.0024705	0.080776	0.0305846	8.06981e-11	1059	248.112	810.888	NA	21	19	2	NA	NA	0.0208166	1:1:1:1:1:1	0.427762(0.524079:0.433428:0.325779)	NA	NA	NA	NA
psbENL-psbEEC	NG	NA	0.112664	0	NA	249	57.3559	191.644	NA	6	6	NA	NA	NA	0.0259515	1:1:1:1:1:1	0.413655(0.433735:0.481928:0.325301)	NA	NA	NA	NA
psbFNL-psbFEC	NG	0.0115744	0.0699786	0.165399	0.144946	117	29.9342	87.0658	NA	3	2	1	NA	NA	0.026517	1:1:1:1:1:1	0.41453(0.474359:0.435897:0.333333)	NA	NA	NA	NA
psbHNL-psbHEC	NG	0.0510752	0.113479	0.450086	0.190592	219	56.9742	162.026	NA	14	6	8	NA	NA	0.0673098	1:1:1:1:1:1	0.406393(0.452055:0.479452:0.287671)	NA	NA	NA	NA
psbINL-psbIEC	NG	0.0123504	0.169526	0.0728522	0.0116125	108	26.3622	81.6378	NA	5	4	1	NA	NA	0.0507161	1:1:1:1:1:1	0.393519(0.527778:0.291667:0.361111)	NA	NA	NA	NA
psbJNL-psbJEC	NG	0.0230667	0.0653553	0.352943	0.28364	120	31.9547	88.0453	NA	4	2	2	NA	NA	0.0343277	1:1:1:1:1:1	0.4125(0.3875:0.5125:0.3375)	NA	NA	NA	NA
psbKNL-psbKEC	NG	0.0141563	0.230036	0.0615395	9.81883e-05	183	40.3827	142.617	NA	10	8	2	NA	NA	0.0617946	1:1:1:1:1:1	0.344262(0.418033:0.327869:0.286885)	NA	NA	NA	NA
psbLNL-psbLEC	NG	NA	0.139148	0	NA	114	23.6216	90.3784	NA	3	3	NA	NA	NA	0.0288324	1:1:1:1:1:1	0.337719(0.368421:0.263158:0.381579)	NA	NA	NA	NA
psbMNL-psbMEC	NG	NA	0.0855473	0	NA	102	24.7375	77.2625	NA	2	2	NA	NA	NA	0.0207474	1:1:1:1:1:1	0.323529(0.470588:0.294118:0.205882)	NA	NA	NA	NA
psbNNL-psbNEC	NG	0.0103708	0.175787	0.0589962	0.00338423	129	31.9069	97.0931	NA	6	5	1	NA	NA	0.0512849	1:1:1:1:1:1	0.434109(0.569767:0.430233:0.302326)	NA	NA	NA	NA
psbTNL-psbTEC	NG	0.0382665	0.0418191	0.915047	0.65963	105	24.5854	80.4146	NA	4	1	3	NA	NA	0.0390983	1:1:1:1:1:1	0.371429(0.414286:0.328571:0.371429)	NA	NA	NA	NA
psbZNL-psbZEC	NG	0.0219135	0.090154	0.243068	0.0696392	186	47.0886	138.911	NA	7	4	3	NA	NA	0.0391896	1:1:1:1:1:1	0.360215(0.395161:0.419355:0.266129)	NA	NA	NA	NA
rbcLNL-rbcLEC	NG	0.00462888	0.0835513	0.0554017	4.67787e-13	1425	341.489	1083.51	NA	32	27	5	NA	NA	0.023542	1:1:1:1:1:1	0.445263(0.578947:0.437895:0.318947)	NA	NA	NA	NA
rpl14NL-rpl14EC	NG	0.0182033	0.17886	0.101774	3.60951e-06	366	87.9775	278.023	NA	19	14	5	NA	NA	0.0568212	1:1:1:1:1:1	0.404372(0.54918:0.377049:0.286885)	NA	NA	NA	NA
rpl16NL-rpl16EC	NG	0.0268227	0.0510157	0.525774	0.303635	405	101.38	303.62	NA	13	5	8	NA	NA	0.0328787	1:1:1:1:1:1	0.428395(0.511111:0.52963:0.244444)	NA	NA	NA	NA
rpl20NL-rpl20EC	NG	0.0344713	0.144169	0.239103	0.00199389	351	83.8673	267.133	NA	20	11	9	NA	NA	0.0606824	1:1:1:1:1:1	0.367521(0.388889:0.452991:0.260684)	NA	NA	NA	NA
rpl22NL-rpl22EC	NG	0.0363122	0.129428	0.28056	0.000949115	486	105.152	380.848	NA	26	12.5	13.5	NA	NA	0.0564589	1:1:1:1:1:1	0.353909(0.401235:0.37037:0.290123)	NA	NA	NA	NA
rpl23NL-rpl23EC	NG	0.0140268	0.0160132	0.875952	0.641369	279	63.1175	215.883	NA	4	1	3	NA	NA	0.0144762	1:1:1:1:1:1	0.38172(0.424731:0.413978:0.306452)	NA	NA	NA	NA
rpl2NL-rpl2EC	NG	NA	0.00495099	0	NA	822	202.647	619.353	NA	1	1	NA	NA	NA	0.00122056	1:1:1:1:1:1	0.442214(0.514599:0.489051:0.322993)	NA	NA	NA	NA
rpl32NL-rpl32EC	NG	0.104651	0.317806	0.329292	0.006519	156	35.7067	120.293	NA	21	9.25	11.75	NA	NA	0.15344	1:1:1:1:1:1	0.339744(0.307692:0.442308:0.269231)	NA	NA	NA	NA
rpl33NL-rpl33EC	NG	0.0467382	0.0980637	0.476611	0.202258	198	43.5146	154.485	NA	11	4	7	NA	NA	0.0580181	1:1:1:1:1:1	0.358586(0.363636:0.401515:0.310606)	NA	NA	NA	NA
rpl36NL-rpl36EC	NG	0.0120071	0.0379144	0.316689	0.371942	111	27.0475	83.9525	NA	2	1	1	NA	NA	0.01832	1:1:1:1:1:1	0.405405(0.445946:0.486486:0.283784)	NA	NA	NA	NA
rpoANL-rpoAEC	NG	0.0548266	0.124187	0.441485	0.00297782	975	218.436	756.564	NA	65	25	40	NA	NA	0.0703659	1:1:1:1:1:1	0.363077(0.48:0.326154:0.283077)	NA	NA	NA	NA
rpoBNL-rpoBEC	NG	0.0229226	0.0956548	0.239639	7.18752e-15	3210	751.619	2458.38	NA	123	67.5	55.5	NA	NA	0.0399528	1:1:1:1:1:1	0.401713(0.508411:0.380374:0.316355)	NA	NA	NA	NA
rpoC1NL-rpoC1EC	NG	0.0167931	0.113591	0.147839	8.86864e-16	2040	474.35	1565.65	NA	76	50	26	NA	NA	0.039301	1:1:1:1:1:1	0.390441(0.509559:0.386029:0.275735)	NA	NA	NA	NA
rpoC2NL-rpoC2EC	NG	0.0332594	0.115239	0.288612	1.35205e-17	4161	964.218	3196.78	NA	207	103	104	NA	NA	0.0522564	1:1:1:1:1:1	0.382841(0.466474:0.372386:0.309661)	NA	NA	NA	NA
rps11NL-rps11EC	NG	0.0199402	0.0472976	0.421589	0.134461	414	109.082	304.918	NA	11	5	6	NA	NA	0.0271484	1:1:1:1:1:1	0.474638(0.547101:0.597826:0.278986)	NA	NA	NA	NA
rps12NL-rps12EC	NG	0.00367631	0.0210567	0.174591	0.15071	369	96.3211	272.679	NA	3	2	1	NA	NA	0.00821317	1:1:1:1:1:1	0.448509(0.528455:0.49187:0.325203)	NA	NA	NA	NA
rps14NL-rps14EC	NG	0.0307074	0.0781835	0.392761	0.0305112	300	67.3434	232.657	NA	12	5	7	NA	NA	0.0413647	1:1:1:1:1:1	0.413333(0.45:0.455:0.335)	NA	NA	NA	NA
rps15NL-rps15EC	NG	0.0461821	0.101579	0.454642	0.0756452	270	57.8944	212.106	NA	15	5.5	9.5	NA	NA	0.0580606	1:1:1:1:1:1	0.32037(0.388889:0.277778:0.294444)	NA	NA	NA	NA
rps16NL-rps16EC	NG	0.0466267	0.116419	0.400509	0.0674251	264	64.9152	199.085	NA	16	7	9	NA	NA	0.0637879	1:1:1:1:1:1	0.378788(0.534091:0.375:0.227273)	NA	NA	NA	NA
rps18NL-rps18EC	NG	0.0338048	0.0910031	0.371469	0.0322544	333	75.8471	257.153	NA	15	6.5	8.5	NA	NA	0.0468328	1:1:1:1:1:1	0.339339(0.333333:0.418919:0.265766)	NA	NA	NA	NA
rps19NL-rps19EC	NG	NA	0.0319425	0	NA	276	63.9554	212.045	NA	2	2	NA	NA	NA	0.00740178	1:1:1:1:1:1	0.362319(0.434783:0.402174:0.25)	NA	NA	NA	NA
rps2NL-rps2EC	NG	0.0289931	0.0654417	0.443037	0.0521036	687	159.571	527.429	NA	25	10	15	NA	NA	0.0374591	1:1:1:1:1:1	0.392285(0.458515:0.423581:0.29476)	NA	NA	NA	NA
rps3NL-rps3EC	NG	0.0218714	0.115315	0.189667	3.03957e-05	660	149.691	510.309	NA	27	16	11	NA	NA	0.0430647	1:1:1:1:1:1	0.343939(0.484091:0.331818:0.215909)	NA	NA	NA	NA
rps4NL-rps4EC	NG	0.0288822	0.0576488	0.501003	0.121632	603	144.173	458.827	NA	21	8	13	NA	NA	0.0357601	1:1:1:1:1:1	0.385572(0.527363:0.375622:0.253731)	NA	NA	NA	NA
rps7NL-rps7EC	NG	NA	0.0087899	0	NA	465	114.435	350.565	NA	1	1	NA	NA	NA	0.00216316	1:1:1:1:1:1	0.411828(0.535484:0.451613:0.248387)	NA	NA	NA	NA
rps8NL-rps8EC	NG	0.0344959	0.174407	0.19779	9.81431e-05	393	96.393	296.607	NA	25	15	10	NA	NA	0.0688126	1:1:1:1:1:1	0.360051(0.435115:0.385496:0.259542)	NA	NA	NA	NA
ycf1NL-ycf1EC	NG	0.0985479	0.146227	0.673938	9.05538e-05	5466	1116.51	4349.49	NA	550	148.333	401.667	NA	NA	0.108287	1:1:1:1:1:1	0.308269(0.362239:0.290066:0.272503)	NA	NA	NA	NA
ycf2NL-ycf2EC	NG	0.0110613	0.0174045	0.635545	0.0614174	6810	1482.21	5327.79	NA	84	25.5	58.5	NA	NA	0.0124419	1:1:1:1:1:1	0.378634(0.41696:0.344053:0.37489)	NA	NA	NA	NA
ycf3NL-ycf3EC	NG	0.0102998	0.104297	0.0987551	2.85213e-05	504	112.972	391.028	NA	15	11	4	NA	NA	0.0313692	1:1:1:1:1:1	0.405754(0.479167:0.389881:0.348214)	NA	NA	NA	NA
ycf4NL-ycf4EC	NG	0.0488208	0.101677	0.480154	0.0470216	552	123.572	428.428	NA	32	11.75	20.25	NA	NA	0.0606534	1:1:1:1:1:1	0.378623(0.410326:0.402174:0.32337)	NA	NA	NA	NA

## Sheet: NL_KP
Sequence	Method	Ka	Ks	Ka/Ks	P-Value(Fisher)	Length	S-Sites	N-Sites	Fold-Sites(0:2:4)	Substitutions	S-Substitutions	N-Substitutions	Fold-S-Substitutions(0:2:4)	Fold-N-Substitutions(0:2:4)	Divergence-Time	Substitution-Rate-Ratio(rTC:rAG:rTA:rCG:rTG:rCA/rCA)	GC(1:2:3)	ML-Score	AICc	Akaike-Weight	Model
accDNL-accDKP	NG	0.0239533	0.0770913	0.310714	8.7185e-05	1488	300.294	1187.71	NA	50	22	28	NA	NA	0.0346771	1:1:1:1:1:1	0.347446(0.389113:0.36996:0.283266)	NA	NA	NA	NA
atpANL-atpAKP	NG	0.009626	0.0916526	0.105027	3.15642e-12	1521	370.912	1150.09	NA	43	32	11	NA	NA	0.0296291	1:1:1:1:1:1	0.404668(0.551282:0.394477:0.268245)	NA	NA	NA	NA
atpBNL-atpBKP	NG	0.00808635	0.0816169	0.0990769	2.65957e-11	1494	375.002	1119	NA	38	29	9	NA	NA	0.0265429	1:1:1:1:1:1	0.439759(0.569277:0.416667:0.333333)	NA	NA	NA	NA
atpENL-atpEKP	NG	0.00329441	0.10152	0.032451	1.39156e-05	399	94.7882	304.212	NA	10	9	1	NA	NA	0.0266292	1:1:1:1:1:1	0.411028(0.511278:0.409774:0.31203)	NA	NA	NA	NA
atpFNL-atpFKP	NG	0.0190517	0.0833725	0.228513	0.00235804	552	126.734	425.266	NA	18	10	8	NA	NA	0.0338191	1:1:1:1:1:1	0.391304(0.486413:0.334239:0.353261)	NA	NA	NA	NA
atpHNL-atpHKP	NG	NA	0.183943	0	NA	243	67.4338	175.566	NA	11	11	NA	NA	NA	0.0510453	1:1:1:1:1:1	0.475309(0.641975:0.493827:0.290123)	NA	NA	NA	NA
atpINL-atpIKP	NG	0.00895005	0.0951749	0.0940378	4.91452e-07	741	179.004	561.996	NA	21	16	5	NA	NA	0.0297794	1:1:1:1:1:1	0.377868(0.495951:0.368421:0.269231)	NA	NA	NA	NA
ccsANL-ccsAKP	NG	0.0327772	0.104821	0.312697	0.000298977	963	214.667	748.333	NA	45	21	24	NA	NA	0.0488369	1:1:1:1:1:1	0.334891(0.353583:0.375389:0.275701)	NA	NA	NA	NA
cemANL-cemAKP	NG	0.0364835	0.104682	0.348519	0.00410919	696	148.407	547.593	NA	34	14.5	19.5	NA	NA	0.0510253	1:1:1:1:1:1	0.339799(0.403017:0.286638:0.329741)	NA	NA	NA	NA
clpPNL-clpPKP	NG	0.0585128	0.0577794	1.01269	0.99993	588	143.86	444.14	NA	33	8	25	NA	NA	0.0583333	1:1:1:1:1:1	0.431122(0.566327:0.382653:0.344388)	NA	NA	NA	NA
matKNL-matKKP	NG	0.0396474	0.0866807	0.457395	0.00206121	1521	329.835	1191.17	NA	73	27	46	NA	NA	0.0498467	1:1:1:1:1:1	0.347798(0.411243:0.319527:0.312623)	NA	NA	NA	NA
ndhANL-ndhAKP	NG	0.0122737	0.0422809	0.29029	0.00515059	1089	267.567	821.433	NA	21	11	10	NA	NA	0.0196465	1:1:1:1:1:1	0.348944(0.435262:0.391185:0.220386)	NA	NA	NA	NA
ndhBNL-ndhBKP	NG	0.00302629	0.0125304	0.241516	0.0218704	1521	362.135	1158.87	NA	8	4.5	3.5	NA	NA	0.00528913	1:1:1:1:1:1	0.375411(0.418146:0.385602:0.322485)	NA	NA	NA	NA
ndhCNL-ndhCKP	NG	0.0072628	0.0244057	0.297587	0.227271	360	83.2887	276.711	NA	4	2	2	NA	NA	0.0112289	1:1:1:1:1:1	0.352778(0.470833:0.329167:0.258333)	NA	NA	NA	NA
ndhDNL-ndhDKP	NG	0.021287	0.147299	0.144515	7.2197e-16	1530	362.653	1167.35	NA	73	48.5	24.5	NA	NA	0.0511554	1:1:1:1:1:1	0.363725(0.412745:0.370588:0.307843)	NA	NA	NA	NA
ndhENL-ndhEKP	NG	0.0130862	0.0430255	0.30415	0.146897	303	71.7452	231.255	NA	6	3	3	NA	NA	0.0201753	1:1:1:1:1:1	0.338284(0.405941:0.356436:0.252475)	NA	NA	NA	NA
ndhFNL-ndhFKP	NG	0.0356081	0.121365	0.293396	2.19129e-10	2235	495.295	1739.71	NA	116	55.5	60.5	NA	NA	0.0546126	1:1:1:1:1:1	0.324832(0.374497:0.357047:0.242953)	NA	NA	NA	NA
ndhGNL-ndhGKP	NG	0.0149356	0.0910743	0.163994	4.80722e-05	534	128.262	405.738	NA	17	11	6	NA	NA	0.0332235	1:1:1:1:1:1	0.342697(0.421348:0.353933:0.252809)	NA	NA	NA	NA
ndhHNL-ndhHKP	NG	0.00655313	0.121062	0.0541305	1.05805e-14	1179	259.401	919.599	NA	35	29	6	NA	NA	0.031747	1:1:1:1:1:1	0.39313(0.517812:0.367684:0.293893)	NA	NA	NA	NA
ndhINL-ndhIKP	NG	0.00256397	0.0762705	0.0336169	3.21459e-05	501	110.314	390.686	NA	9	8	1	NA	NA	0.0187932	1:1:1:1:1:1	0.374251(0.44012:0.377246:0.305389)	NA	NA	NA	NA
ndhJNL-ndhJKP	NG	0.0164733	0.0488334	0.337336	0.0737536	474	105.759	368.241	NA	11	5	6	NA	NA	0.0236934	1:1:1:1:1:1	0.404008(0.531646:0.367089:0.313291)	NA	NA	NA	NA
ndhKNL-ndhKKP	NG	0.0213547	0.0633868	0.336894	0.0139263	687	164.522	522.478	NA	21	10	11	NA	NA	0.0314205	1:1:1:1:1:1	0.393741(0.445415:0.445415:0.290393)	NA	NA	NA	NA
petANL-petAKP	NG	0.00824238	0.0688407	0.119731	3.94193e-06	960	228.047	731.953	NA	21	15	6	NA	NA	0.0226375	1:1:1:1:1:1	0.40625(0.53125:0.365625:0.321875)	NA	NA	NA	NA
petBNL-petBKP	NG	0.00204641	0.103133	0.0198424	4.00774e-09	645	155.672	489.328	NA	16	15	1	NA	NA	0.0264439	1:1:1:1:1:1	0.407752(0.493023:0.416279:0.313953)	NA	NA	NA	NA
petDNL-petDKP	NG	0.0111029	0.0716573	0.154944	0.00205531	480	117.061	362.939	NA	12	8	4	NA	NA	0.0258707	1:1:1:1:1:1	0.392708(0.50625:0.384375:0.2875)	NA	NA	NA	NA
petGNL-petGKP	NG	NA	0.0766468	0	NA	111	27.4498	83.5502	NA	2	2	NA	NA	NA	0.0189544	1:1:1:1:1:1	0.36036(0.513514:0.297297:0.27027)	NA	NA	NA	NA
petLNL-petLKP	NG	NA	0.0416416	0	NA	93	24.6873	68.3127	NA	1	1	NA	NA	NA	0.011054	1:1:1:1:1:1	0.360215(0.370968:0.451613:0.258065)	NA	NA	NA	NA
petNNL-petNKP	NG	NA	0.0500608	0	NA	87	20.6498	66.3502	NA	1	1	NA	NA	NA	0.0118821	1:1:1:1:1:1	0.431034(0.482759:0.448276:0.362069)	NA	NA	NA	NA
psaANL-psaAKP	NG	0.000580316	0.0634292	0.00914904	7.80977e-20	2250	526.134	1723.87	NA	33	32	1	NA	NA	0.0152767	1:1:1:1:1:1	0.432667(0.526667:0.436:0.335333)	NA	NA	NA	NA
psaBNL-psaBKP	NG	0.00353576	0.0844096	0.0418881	1.27615e-20	2202	501.047	1700.95	NA	46	40	6	NA	NA	0.0219379	1:1:1:1:1:1	0.415985(0.489782:0.430518:0.327657)	NA	NA	NA	NA
psaCNL-psaCKP	NG	NA	0.183172	0	NA	243	55.3781	187.622	NA	9	9	NA	NA	NA	0.0417437	1:1:1:1:1:1	0.417695(0.45679:0.530864:0.265432)	NA	NA	NA	NA
psaINL-psaIKP	NG	0.0240458	0.0387411	0.620679	0.549968	111	26.4848	84.5152	NA	3	1	2	NA	NA	0.0275521	1:1:1:1:1:1	0.36036(0.459459:0.283784:0.337838)	NA	NA	NA	NA
psaJNL-psaJKP	NG	NA	0.176357	0	NA	132	31.8154	100.185	NA	5	5	NA	NA	NA	0.0425066	1:1:1:1:1:1	0.401515(0.420455:0.409091:0.375)	NA	NA	NA	NA
psbANL-psbAKP	NG	NA	0.0855858	0	NA	1059	247.271	811.729	NA	20	20	NA	NA	NA	0.0199838	1:1:1:1:1:1	0.422096(0.501416:0.436261:0.328612)	NA	NA	NA	NA
psbBNL-psbBKP	NG	0.00518235	0.0939961	0.0551336	2.3548e-15	1524	362.219	1161.78	NA	38	32	6	NA	NA	0.0262913	1:1:1:1:1:1	0.436024(0.544291:0.459646:0.304134)	NA	NA	NA	NA
psbCNL-psbCKP	NG	NA	0.069489	0	NA	1419	346.558	1072.44	NA	23	23	NA	NA	NA	0.0169711	1:1:1:1:1:1	0.445384(0.540169:0.458774:0.337209)	NA	NA	NA	NA
psbDNL-psbDKP	NG	0.00247102	0.0717999	0.0344153	1.35532e-09	1059	248.283	810.717	NA	19	17	2	NA	NA	0.0187252	1:1:1:1:1:1	0.42729(0.524079:0.433428:0.324363)	NA	NA	NA	NA
psbENL-psbEKP	NG	NA	0.0357067	0	NA	249	57.3559	191.644	NA	2	2	NA	NA	NA	0.00822485	1:1:1:1:1:1	0.413655(0.433735:0.481928:0.325301)	NA	NA	NA	NA
psbFNL-psbFKP	NG	NA	0.033924	0	NA	117	30.1493	86.8507	NA	1	1	NA	NA	NA	0.00874176	1:1:1:1:1:1	0.41453(0.487179:0.435897:0.320513)	NA	NA	NA	NA
psbHNL-psbHKP	NG	0.00619568	0.0737744	0.0839815	0.0158869	219	56.9297	162.07	NA	5	4	1	NA	NA	0.023763	1:1:1:1:1:1	0.417808(0.479452:0.479452:0.294521)	NA	NA	NA	NA
psbINL-psbIKP	NG	NA	0.0384793	0	NA	108	26.6604	81.3396	NA	1	1	NA	NA	NA	0.00949882	1:1:1:1:1:1	0.393519(0.527778:0.305556:0.347222)	NA	NA	NA	NA
psbJNL-psbJKP	NG	0.0230667	0.0653553	0.352943	0.28364	120	31.9547	88.0453	NA	4	2	2	NA	NA	0.0343277	1:1:1:1:1:1	0.408333(0.3875:0.5125:0.325)	NA	NA	NA	NA
psbKNL-psbKKP	NG	NA	0.0251811	0	NA	183	40.3827	142.617	NA	1	1	NA	NA	NA	0.00555673	1:1:1:1:1:1	0.34153(0.409836:0.327869:0.286885)	NA	NA	NA	NA
psbLNL-psbLKP	NG	NA	0.0898405	0	NA	114	23.6216	90.3784	NA	2	2	NA	NA	NA	0.0186156	1:1:1:1:1:1	0.333333(0.368421:0.263158:0.368421)	NA	NA	NA	NA
psbMNL-psbMKP	NG	NA	0.0415546	0	NA	102	24.7375	77.2625	NA	1	1	NA	NA	NA	0.010078	1:1:1:1:1:1	0.328431(0.470588:0.294118:0.220588)	NA	NA	NA	NA
psbNNL-psbNKP	NG	0.0208496	0.0658273	0.316732	0.250094	129	31.7354	97.2646	NA	4	2	2	NA	NA	0.0319146	1:1:1:1:1:1	0.434109(0.569767:0.418605:0.313953)	NA	NA	NA	NA
psbTNL-psbTKP	NG	NA	0.0429769	0	NA	105	23.9414	81.0586	NA	1	1	NA	NA	NA	0.00979928	1:1:1:1:1:1	0.366667(0.4:0.314286:0.385714)	NA	NA	NA	NA
psbZNL-psbZKP	NG	NA	0.0438846	0	NA	186	46.9204	139.08	NA	2	2	NA	NA	NA	0.0110703	1:1:1:1:1:1	0.354839(0.387097:0.419355:0.258065)	NA	NA	NA	NA
rbcLNL-rbcLKP	NG	0.011616	0.0691642	0.167948	1.24358e-07	1425	340.543	1084.46	NA	35	22.5	12.5	NA	NA	0.0253687	1:1:1:1:1:1	0.443509(0.571579:0.437895:0.321053)	NA	NA	NA	NA
rpl14NL-rpl14KP	NG	NA	0.0467596	0	NA	366	88.2383	277.762	NA	4	4	NA	NA	NA	0.0112732	1:1:1:1:1:1	0.404372(0.540984:0.385246:0.286885)	NA	NA	NA	NA
rpl16NL-rpl16KP	NG	0.013257	0.051426	0.257788	0.0457711	405	100.598	304.402	NA	9	5	4	NA	NA	0.0227379	1:1:1:1:1:1	0.423457(0.511111:0.522222:0.237037)	NA	NA	NA	NA
rpl20NL-rpl20KP	NG	0.027737	0.0575807	0.481707	0.166068	384	90.2106	293.789	NA	13	5	8	NA	NA	0.034748	1:1:1:1:1:1	0.372396(0.382812:0.453125:0.28125)	NA	NA	NA	NA
rpl22NL-rpl22KP	NG	0.0322047	0.0800817	0.402148	0.0459695	486	105.326	380.674	NA	20	8	12	NA	NA	0.0425806	1:1:1:1:1:1	0.356996(0.404321:0.376543:0.290123)	NA	NA	NA	NA
rpl23NL-rpl23KP	NG	0.00465026	NA	NA	NA	279	63.2909	215.709	NA	1	NA	1	NA	NA	0.00359535	1:1:1:1:1:1	0.383513(0.430108:0.408602:0.311828)	NA	NA	NA	NA
rpl2NL-rpl2KP	NG	0.00323615	0.0149521	0.216434	0.0983713	822	202.647	619.353	NA	5	3	2	NA	NA	0.00612448	1:1:1:1:1:1	0.439781(0.512774:0.489051:0.317518)	NA	NA	NA	NA
rpl32NL-rpl32KP	NG	0.0251907	0.0913063	0.275892	0.125945	156	34.897	121.103	NA	6	3	3	NA	NA	0.0399806	1:1:1:1:1:1	0.326923(0.269231:0.471154:0.240385)	NA	NA	NA	NA
rpl33NL-rpl33KP	NG	0.0130676	0.124419	0.105029	0.00625732	198	43.6123	154.388	NA	7	5	2	NA	NA	0.0375943	1:1:1:1:1:1	0.371212(0.378788:0.416667:0.318182)	NA	NA	NA	NA
rpl36NL-rpl36KP	NG	0.0120071	0.0778481	0.154238	0.133323	111	27.0475	83.9525	NA	3	2	1	NA	NA	0.0280506	1:1:1:1:1:1	0.40991(0.445946:0.486486:0.297297)	NA	NA	NA	NA
rpoANL-rpoAKP	NG	0.0389715	0.0673427	0.578704	0.130482	981	217.365	763.635	NA	43	14	29	NA	NA	0.0452578	1:1:1:1:1:1	0.363914(0.469419:0.324159:0.298165)	NA	NA	NA	NA
rpoBNL-rpoBKP	NG	0.0122879	0.0583205	0.210696	1.14515e-10	3210	748.521	2461.48	NA	72	42	30	NA	NA	0.023022	1:1:1:1:1:1	0.398442(0.506075:0.379439:0.309813)	NA	NA	NA	NA
rpoC1NL-rpoC1KP	NG	0.0102744	0.0640983	0.160291	2.60676e-09	2040	472.039	1567.96	NA	45	29	16	NA	NA	0.0227288	1:1:1:1:1:1	0.389706(0.507353:0.380147:0.281618)	NA	NA	NA	NA
rpoC2NL-rpoC2KP	NG	0.0231095	0.0824179	0.280395	1.39131e-13	4068	948.1	3119.9	NA	145	74	71	NA	NA	0.0369321	1:1:1:1:1:1	0.388274(0.472345:0.37795:0.314528)	NA	NA	NA	NA
rps11NL-rps11KP	NG	0.0165842	0.108211	0.153257	0.000359126	414	109.162	304.838	NA	16	11	5	NA	NA	0.0407442	1:1:1:1:1:1	0.472222(0.543478:0.597826:0.275362)	NA	NA	NA	NA
rps12NL-rps12KP	NG	0.00367631	0.0104545	0.35165	0.386838	369	96.3211	272.679	NA	2	1	1	NA	NA	0.00544563	1:1:1:1:1:1	0.447154(0.528455:0.49187:0.321138)	NA	NA	NA	NA
rps14NL-rps14KP	NG	0.0262984	0.111033	0.236852	0.0121596	300	67.8261	232.174	NA	13	7	6	NA	NA	0.0454558	1:1:1:1:1:1	0.42(0.455:0.455:0.35)	NA	NA	NA	NA
rps15NL-rps15KP	NG	0.0423086	0.106903	0.395768	0.0780217	279	60.2208	218.779	NA	15	6	9	NA	NA	0.0562509	1:1:1:1:1:1	0.31362(0.392473:0.274194:0.274194)	NA	NA	NA	NA
rps16NL-rps16KP	NG	0.0412454	0.0478963	0.861139	0.691051	264	64.6566	199.343	NA	11	3	8	NA	NA	0.0428743	1:1:1:1:1:1	0.375(0.545455:0.363636:0.215909)	NA	NA	NA	NA
rps18NL-rps18KP	NG	0.0156889	0.0409006	0.383587	0.194218	333	75.3668	257.633	NA	7	3	4	NA	NA	0.021395	1:1:1:1:1:1	0.336336(0.342342:0.40991:0.256757)	NA	NA	NA	NA
rps19NL-rps19KP	NG	0.00473088	NA	NA	NA	276	63.9554	212.045	NA	1	NA	1	NA	NA	0.00363463	1:1:1:1:1:1	0.356884(0.429348:0.402174:0.23913)	NA	NA	NA	NA
rps2NL-rps2KP	NG	0.0185558	0.127205	0.145873	6.63245e-07	708	162.39	545.61	NA	29	19	10	NA	NA	0.043476	1:1:1:1:1:1	0.382768(0.440678:0.423729:0.283898)	NA	NA	NA	NA
rps3NL-rps3KP	NG	0.00590416	0.0772353	0.0764439	1.16974e-05	660	149.881	510.119	NA	14	11	3	NA	NA	0.0221029	1:1:1:1:1:1	0.34697(0.486364:0.334091:0.220455)	NA	NA	NA	NA
rps4NL-rps4KP	NG	0.0153871	0.0504792	0.30482	0.027979	603	143.39	459.61	NA	14	7	7	NA	NA	0.0237318	1:1:1:1:1:1	0.384743(0.524876:0.370647:0.258706)	NA	NA	NA	NA
rps7NL-rps7KP	NG	NA	0.0087899	0	NA	465	114.435	350.565	NA	1	1	NA	NA	NA	0.00216316	1:1:1:1:1:1	0.411828(0.535484:0.451613:0.248387)	NA	NA	NA	NA
rps8NL-rps8KP	NG	0.0167142	0.131474	0.127129	6.05967e-05	402	99.5067	302.493	NA	17	12	5	NA	NA	0.0451205	1:1:1:1:1:1	0.374378(0.436567:0.402985:0.283582)	NA	NA	NA	NA
ycf1NL-ycf1KP	NG	0.0526837	0.0765771	0.687982	0.00460449	5601	1142.44	4458.56	NA	310	83.1667	226.833	NA	NA	0.0575573	1:1:1:1:1:1	0.30316(0.354847:0.290841:0.263792)	NA	NA	NA	NA
ycf2NL-ycf2KP	NG	0.00448817	0.00946429	0.474222	0.0296372	6852	1488.6	5363.4	NA	38	14	24	NA	NA	0.00556924	1:1:1:1:1:1	0.378649(0.418345:0.343914:0.373687)	NA	NA	NA	NA
ycf3NL-ycf3KP	NG	0.00771853	0.064464	0.119734	0.00161794	504	113.321	390.679	NA	10	7	3	NA	NA	0.0204774	1:1:1:1:1:1	0.410714(0.482143:0.389881:0.360119)	NA	NA	NA	NA
ycf4NL-ycf4KP	NG	0.0165465	0.0673107	0.245822	0.00818219	552	124.265	427.735	NA	15	8	7	NA	NA	0.0279744	1:1:1:1:1:1	0.375906(0.421196:0.391304:0.315217)	NA	NA	NA	NA

## Sheet: NL_XS
Sequence	Method	Ka	Ks	Ka/Ks	P-Value(Fisher)	Length	S-Sites	N-Sites	Fold-Sites(0:2:4)	Substitutions	S-Substitutions	N-Substitutions	Fold-S-Substitutions(0:2:4)	Fold-N-Substitutions(0:2:4)	Divergence-Time	Substitution-Rate-Ratio(rTC:rAG:rTA:rCG:rTG:rCA/rCA)	GC(1:2:3)	ML-Score	AICc	Akaike-Weight	Model
accDNL-accDXS	NG	0.0424977	0.114226	0.372049	4.61723e-05	1488	302.021	1185.98	NA	81	32	49	NA	NA	0.0570565	1:1:1:1:1:1	0.352151(0.398185:0.373992:0.284274)	NA	NA	NA	NA
atpANL-atpAXS	NG	0.00611896	0.109703	0.0557777	1.07132e-17	1521	372.342	1148.66	NA	45	38	7	NA	NA	0.0314763	1:1:1:1:1:1	0.407955(0.550296:0.397436:0.276134)	NA	NA	NA	NA
atpBNL-atpBXS	NG	0.0053866	0.108517	0.0496382	6.05865e-18	1494	376.119	1117.88	NA	44	38	6	NA	NA	0.03135	1:1:1:1:1:1	0.43909(0.572289:0.417671:0.327309)	NA	NA	NA	NA
atpENL-atpEXS	NG	0.0148998	0.146424	0.101758	3.50018e-06	399	93.973	305.027	NA	17	12.5	4.5	NA	NA	0.0458765	1:1:1:1:1:1	0.409774(0.5:0.409774:0.319549)	NA	NA	NA	NA
atpFNL-atpFXS	NG	0.0263454	0.100914	0.261068	0.00177795	552	127.093	424.907	NA	23	12	11	NA	NA	0.043514	1:1:1:1:1:1	0.39221(0.494565:0.339674:0.342391)	NA	NA	NA	NA
atpHNL-atpHXS	NG	NA	0.183797	0	NA	243	67.4811	175.519	NA	11	11	NA	NA	NA	0.0510405	1:1:1:1:1:1	0.467078(0.641975:0.493827:0.265432)	NA	NA	NA	NA
atpINL-atpIXS	NG	0.0107398	0.108414	0.0990625	1.21175e-07	741	178.319	562.681	NA	24	18	6	NA	NA	0.0342448	1:1:1:1:1:1	0.37247(0.489879:0.368421:0.259109)	NA	NA	NA	NA
ccsANL-ccsAXS	NG	0.207744	0.251066	0.82745	0.27772	954	215.984	738.016	NA	180	46.0833	133.917	NA	NA	0.217552	1:1:1:1:1:1	0.356918(0.38522:0.383648:0.301887)	NA	NA	NA	NA
cemANL-cemAXS	NG	0.0302617	0.16343	0.185166	4.11482e-07	696	148.111	547.889	NA	38	21.75	16.25	NA	NA	0.0586002	1:1:1:1:1:1	0.338362(0.403017:0.282328:0.329741)	NA	NA	NA	NA
clpPNL-clpPXS	NG	0.0765862	0.0896635	0.854152	0.575674	555	136.077	418.923	NA	42	11.5	30.5	NA	NA	0.0797926	1:1:1:1:1:1	0.422523(0.567568:0.383784:0.316216)	NA	NA	NA	NA
matKNL-matKXS	NG	0.0605442	0.170194	0.355736	8.97856e-08	1512	330.016	1181.98	NA	119	50.25	68.75	NA	NA	0.084477	1:1:1:1:1:1	0.348876(0.417659:0.322421:0.306548)	NA	NA	NA	NA
ndhANL-ndhAXS	NG	0.0297842	0.130535	0.22817	8.20856e-08	1089	267.097	821.903	NA	56	32	24	NA	NA	0.0544951	1:1:1:1:1:1	0.346648(0.431129:0.389807:0.219008)	NA	NA	NA	NA
ndhBNL-ndhBXS	NG	0.00476393	0.0181326	0.262728	0.0106331	1521	362.822	1158.18	NA	12	6.5	5.5	NA	NA	0.00795291	1:1:1:1:1:1	0.376068(0.420118:0.387574:0.320513)	NA	NA	NA	NA
ndhCNL-ndhCXS	NG	0.00362035	0.0369913	0.0978704	0	360	83.1166	276.883	NA	4	3	1	NA	NA	0.011325	1:1:1:1:1:1	0.358333(0.470833:0.333333:0.270833)	NA	NA	NA	NA
ndhDNL-ndhDXS	NG	0.0404747	0.165986	0.243845	3.22864e-12	1527	363.776	1163.22	NA	100	54.1667	45.8333	NA	NA	0.070375	1:1:1:1:1:1	0.365422(0.414538:0.37721:0.304519)	NA	NA	NA	NA
ndhENL-ndhEXS	NG	0.0174765	0.137908	0.126726	0.000459384	303	71.4446	231.555	NA	13	9	4	NA	NA	0.0458732	1:1:1:1:1:1	0.336634(0.39604:0.356436:0.257426)	NA	NA	NA	NA
ndhFNL-ndhFXS	NG	0.0523132	0.196961	0.265602	1.43566e-16	2238	496.475	1741.52	NA	174	86	88	NA	NA	0.0844016	1:1:1:1:1:1	0.324173(0.372654:0.353217:0.246649)	NA	NA	NA	NA
ndhGNL-ndhGXS	NG	0.0200728	0.0897118	0.223748	0.00149985	534	130.094	403.906	NA	19	11	8	NA	NA	0.0370384	1:1:1:1:1:1	0.353933(0.441011:0.359551:0.261236)	NA	NA	NA	NA
ndhHNL-ndhHXS	NG	0.0249044	0.145744	0.170877	5.31237e-11	1179	260.461	918.539	NA	57	34.5	22.5	NA	NA	0.0515999	1:1:1:1:1:1	0.391858(0.520356:0.367684:0.287532)	NA	NA	NA	NA
ndhINL-ndhIXS	NG	0.0168751	0.187586	0.0899593	5.81401e-09	501	111.468	389.532	NA	25	18.5	6.5	NA	NA	0.0548569	1:1:1:1:1:1	0.365269(0.443114:0.383234:0.269461)	NA	NA	NA	NA
ndhJNL-ndhJXS	NG	0.0248264	0.134682	0.184333	0.000138203	474	105.449	368.551	NA	22	13	9	NA	NA	0.0492657	1:1:1:1:1:1	0.404008(0.525316:0.367089:0.31962)	NA	NA	NA	NA
ndhKNL-ndhKXS	NG	0.0232698	0.119245	0.195143	1.49406e-05	687	163.268	523.732	NA	30	18	12	NA	NA	0.0460785	1:1:1:1:1:1	0.389374(0.445415:0.436681:0.286026)	NA	NA	NA	NA
petANL-petAXS	NG	0.0109957	0.124232	0.0885091	4.72365e-11	960	227.097	732.903	NA	34	26	8	NA	NA	0.0377829	1:1:1:1:1:1	0.399479(0.528125:0.3625:0.307812)	NA	NA	NA	NA
petBNL-petBXS	NG	0.00409951	0.156443	0.0262044	3.27883e-14	645	155.802	489.198	NA	24	22	2	NA	NA	0.0408987	1:1:1:1:1:1	0.412403(0.495349:0.416279:0.325581)	NA	NA	NA	NA
petDNL-petDXS	NG	0.0139309	0.170962	0.0814856	3.87832e-08	480	117.742	362.258	NA	23	18	5	NA	NA	0.05245	1:1:1:1:1:1	0.392708(0.509375:0.3875:0.28125)	NA	NA	NA	NA
petGNL-petGXS	NG	NA	0.208663	0	NA	111	27.4498	83.5502	NA	5	5	NA	NA	NA	0.0516014	1:1:1:1:1:1	0.369369(0.513514:0.297297:0.297297)	NA	NA	NA	NA
petLNL-petLXS	NG	NA	0.0857319	0	NA	93	24.6873	68.3127	NA	2	2	NA	NA	NA	0.0227579	1:1:1:1:1:1	0.365591(0.370968:0.451613:0.274194)	NA	NA	NA	NA
petNNL-petNXS	NG	NA	NA	NA	NA	87	20.6498	66.3502	NA	0	NA	NA	NA	NA	NA	1:1:1:1:1:1	0.436782(0.482759:0.448276:0.37931)	NA	NA	NA	NA
psaANL-psaAXS	NG	0.00465654	0.121336	0.0383772	1.62331e-31	2250	526.647	1723.35	NA	67	59	8	NA	NA	0.0319671	1:1:1:1:1:1	0.430667(0.528:0.434667:0.329333)	NA	NA	NA	NA
psaBNL-psaBXS	NG	0.00472055	0.100018	0.0471968	2.22494e-23	2202	501.943	1700.06	NA	55	47	8	NA	NA	0.0264436	1:1:1:1:1:1	0.414623(0.489101:0.431199:0.323569)	NA	NA	NA	NA
psaCNL-psaCXS	NG	NA	0.160032	0	NA	243	55.5129	187.487	NA	8	8	NA	NA	NA	0.036559	1:1:1:1:1:1	0.415638(0.45679:0.530864:0.259259)	NA	NA	NA	NA
psaINL-psaIXS	NG	0.0239372	0.0393155	0.60885	0.544557	111	26.1077	84.8923	NA	3	1	2	NA	NA	0.0275543	1:1:1:1:1:1	0.346847(0.459459:0.27027:0.310811)	NA	NA	NA	NA
psaJNL-psaJXS	NG	NA	0.100771	0	NA	132	31.8154	100.185	NA	3	3	NA	NA	NA	0.0242883	1:1:1:1:1:1	0.397727(0.420455:0.409091:0.363636)	NA	NA	NA	NA
psbANL-psbAXS	NG	0.00123347	0.117832	0.0104681	6.43641e-17	1059	247.612	811.388	NA	28	27	1	NA	NA	0.028496	1:1:1:1:1:1	0.425401(0.501416:0.436261:0.338527)	NA	NA	NA	NA
psbBNL-psbBXS	NG	0.0299799	0.127545	0.235053	1.01048e-09	1515	358.088	1156.91	NA	76	42	34	NA	NA	0.0530406	1:1:1:1:1:1	0.429043(0.537624:0.454455:0.29505)	NA	NA	NA	NA
psbCNL-psbCXS	NG	0.0018673	0.0985223	0.018953	2.85675e-18	1419	346.6	1072.4	NA	34	32	2	NA	NA	0.0254759	1:1:1:1:1:1	0.443975(0.538055:0.459831:0.334038)	NA	NA	NA	NA
psbDNL-psbDXS	NG	0.00247102	0.0807174	0.0306132	8.17676e-11	1059	248.283	810.717	NA	21	19	2	NA	NA	0.0208159	1:1:1:1:1:1	0.424929(0.524079:0.433428:0.31728)	NA	NA	NA	NA
psbENL-psbEXS	NG	NA	0.112664	0	NA	249	57.3559	191.644	NA	6	6	NA	NA	NA	0.0259515	1:1:1:1:1:1	0.409639(0.433735:0.481928:0.313253)	NA	NA	NA	NA
psbFNL-psbFXS	NG	0.0116436	0.0335844	0.346696	0.388344	117	30.4474	86.5526	NA	2	1	1	NA	NA	0.0173533	1:1:1:1:1:1	0.418803(0.487179:0.448718:0.320513)	NA	NA	NA	NA
psbHNL-psbHXS	NG	0.0813675	0.123953	0.65644	0.411422	219	56.892	162.108	NA	19	6.5	12.5	NA	NA	0.0924303	1:1:1:1:1:1	0.401826(0.458904:0.458904:0.287671)	NA	NA	NA	NA
psbINL-psbIXS	NG	NA	0.267582	0	NA	108	26.6604	81.3396	NA	6	6	NA	NA	NA	0.0660541	1:1:1:1:1:1	0.388889(0.527778:0.305556:0.333333)	NA	NA	NA	NA
psbJNL-psbJXS	NG	0.0348716	0.031966	1.0909	0.71118	120	31.9547	88.0453	NA	4	1	3	NA	NA	0.0340979	1:1:1:1:1:1	0.404167(0.375:0.5125:0.325)	NA	NA	NA	NA
psbKNL-psbKXS	NG	0.0213359	0.230036	0.0927504	0.000300807	183	40.3827	142.617	NA	11	8	3	NA	NA	0.0673899	1:1:1:1:1:1	0.346995(0.42623:0.327869:0.286885)	NA	NA	NA	NA
psbLNL-psbLXS	NG	NA	0.191926	0	NA	114	23.6216	90.3784	NA	4	4	NA	NA	NA	0.0397685	1:1:1:1:1:1	0.324561(0.368421:0.263158:0.342105)	NA	NA	NA	NA
psbMNL-psbMXS	NG	0.0130271	0.133281	0.0977416	0.0396839	102	24.5681	77.4319	NA	4	3	1	NA	NA	0.0419918	1:1:1:1:1:1	0.333333(0.455882:0.294118:0.25)	NA	NA	NA	NA
psbNNL-psbNXS	NG	0.0103753	0.136979	0.0757441	0.0125958	129	31.9494	97.0506	NA	5	4	1	NA	NA	0.0417312	1:1:1:1:1:1	0.44186(0.569767:0.430233:0.325581)	NA	NA	NA	NA
psbTNL-psbTXS	NG	NA	0.0426632	0	NA	105	24.1124	80.8876	NA	1	1	NA	NA	NA	0.00979726	1:1:1:1:1:1	0.357143(0.4:0.314286:0.357143)	NA	NA	NA	NA
psbZNL-psbZXS	NG	0.00724242	0.043563	0.166252	0.143704	186	47.2568	138.743	NA	3	2	1	NA	NA	0.0164703	1:1:1:1:1:1	0.357527(0.395161:0.419355:0.258065)	NA	NA	NA	NA
rbcLNL-rbcLXS	NG	0.0103721	0.123543	0.0839552	2.81691e-16	1425	340.93	1084.07	NA	50	38.8333	11.1667	NA	NA	0.0374481	1:1:1:1:1:1	0.445614(0.577895:0.437895:0.321053)	NA	NA	NA	NA
rpl14NL-rpl14XS	NG	0.0145569	0.192027	0.0758061	3.49051e-07	366	88.5401	277.46	NA	19	15	4	NA	NA	0.0574893	1:1:1:1:1:1	0.409836(0.545082:0.385246:0.29918)	NA	NA	NA	NA
rpl16NL-rpl16XS	NG	0.0228483	0.0695122	0.328694	0.0543708	357	90.3776	266.622	NA	12	6	6	NA	NA	0.0346616	1:1:1:1:1:1	0.432773(0.52521:0.521008:0.252101)	NA	NA	NA	NA
rpl20NL-rpl20XS	NG	0.0227478	0.145411	0.156438	0.000262873	351	83.2179	267.782	NA	17	11	6	NA	NA	0.0518297	1:1:1:1:1:1	0.358974(0.380342:0.440171:0.25641)	NA	NA	NA	NA
rpl22NL-rpl22XS	NG	0.0462535	0.121464	0.380801	0.0175531	486	107.011	378.989	NA	29	12	17	NA	NA	0.0628138	1:1:1:1:1:1	0.355967(0.407407:0.37037:0.290123)	NA	NA	NA	NA
rpl23NL-rpl23XS	NG	0.00930695	0.0161026	0.577976	0.524981	279	62.7707	216.229	NA	3	1	2	NA	NA	0.0108359	1:1:1:1:1:1	0.383513(0.424731:0.408602:0.317204)	NA	NA	NA	NA
rpl2NL-rpl2XS	NG	0.00323818	0.0149232	0.21699	0.0988522	822	203.036	618.964	NA	5	3	2	NA	NA	0.00612441	1:1:1:1:1:1	0.442214(0.514599:0.490876:0.321168)	NA	NA	NA	NA
rpl32NL-rpl32XS	NG	0.0791464	0.430817	0.183712	0.000218707	159	35.8529	123.147	NA	21	11.75	9.25	NA	NA	0.158445	1:1:1:1:1:1	0.330189(0.301887:0.462264:0.226415)	NA	NA	NA	NA
rpl33NL-rpl33XS	NG	0.0331613	0.0972294	0.341063	0.111756	198	43.8641	154.136	NA	9	4	5	NA	NA	0.0473547	1:1:1:1:1:1	0.371212(0.386364:0.416667:0.310606)	NA	NA	NA	NA
rpl36NL-rpl36XS	NG	0.0240561	0.122619	0.196186	0.0868207	111	26.5206	84.4794	NA	5	3	2	NA	NA	0.0476051	1:1:1:1:1:1	0.391892(0.418919:0.486486:0.27027)	NA	NA	NA	NA
rpoANL-rpoAXS	NG	0.0548866	0.0962929	0.569996	0.0525905	981	215.785	765.215	NA	60	19.5	40.5	NA	NA	0.0639945	1:1:1:1:1:1	0.356779(0.464832:0.319572:0.285933)	NA	NA	NA	NA
rpoBNL-rpoBXS	NG	0.0205953	0.0998469	0.206269	4.51728e-17	3210	748.775	2461.23	NA	120	70	50	NA	NA	0.0390818	1:1:1:1:1:1	0.398598(0.504673:0.380374:0.310748)	NA	NA	NA	NA
rpoC1NL-rpoC1XS	NG	0.0141774	0.108906	0.13018	2.54536e-16	2040	473.522	1566.48	NA	70	48	22	NA	NA	0.0361656	1:1:1:1:1:1	0.3875(0.505147:0.385294:0.272059)	NA	NA	NA	NA
rpoC2NL-rpoC2XS	NG	0.031916	0.118553	0.269212	1.466e-19	4167	966.639	3200.36	NA	206	106	100	NA	NA	0.0520137	1:1:1:1:1:1	0.384329(0.467603:0.37473:0.310655)	NA	NA	NA	NA
rps12NL-rps12XS	NG	0.0286454	0.0404666	0.707877	0.455796	354	93.0761	260.924	NA	11	3.66667	7.33333	NA	NA	0.0317535	1:1:1:1:1:1	0.45339(0.533898:0.512712:0.313559)	NA	NA	NA	NA
rps14NL-rps14XS	NG	0.0397238	0.0781357	0.508395	0.294753	300	67.3825	232.618	NA	14	5	9	NA	NA	0.0483514	1:1:1:1:1:1	0.416667(0.45:0.465:0.335)	NA	NA	NA	NA
rps15NL-rps15XS	NG	0.0642941	0.0710419	0.905016	0.757218	270	59.0135	210.986	NA	17	4	13	NA	NA	0.0657689	1:1:1:1:1:1	0.318519(0.372222:0.288889:0.294444)	NA	NA	NA	NA
rps16NL-rps16XS	NG	0.0572396	0.0648365	0.882829	0.751532	264	64.3987	199.601	NA	15	4	11	NA	NA	0.0590927	1:1:1:1:1:1	0.376894(0.534091:0.369318:0.227273)	NA	NA	NA	NA
rps18NL-rps18XS	NG	0.0173893	0.123425	0.140889	0.00131322	303	70.296	232.704	NA	12	8	4	NA	NA	0.0419897	1:1:1:1:1:1	0.344884(0.366337:0.415842:0.252475)	NA	NA	NA	NA
rps19NL-rps19XS	NG	0.176536	0.174048	1.01429	0.987376	102	22.5329	79.4671	NA	16	3.5	12.5	NA	NA	0.175986	1:1:1:1:1:1	0.259804(0.352941:0.264706:0.161765)	NA	NA	NA	NA
rps3NL-rps3XS	NG	0.0239416	0.137999	0.173492	2.66831e-06	660	150.738	509.262	NA	31	19	12	NA	NA	0.0499911	1:1:1:1:1:1	0.346212(0.486364:0.336364:0.215909)	NA	NA	NA	NA
rps4NL-rps4XS	NG	0.0265564	0.0811094	0.327415	0.0086939	603	143.085	459.915	NA	23	11	12	NA	NA	0.0395012	1:1:1:1:1:1	0.383914(0.50995:0.380597:0.261194)	NA	NA	NA	NA
rps7NL-rps7XS	NG	NA	0.017684	0	NA	465	114.435	350.565	NA	2	2	NA	NA	NA	0.00435198	1:1:1:1:1:1	0.412903(0.535484:0.451613:0.251613)	NA	NA	NA	NA
rps8NL-rps8XS	NG	0.023468	0.0854734	0.274565	0.0141108	402	99.031	302.969	NA	15	8	7	NA	NA	0.0387428	1:1:1:1:1:1	0.364428(0.429104:0.402985:0.261194)	NA	NA	NA	NA
ycf1NL-ycf1XS	NG	0.0930213	0.133721	0.695636	0.000444246	5610	1149.18	4460.82	NA	531	140.75	390.25	NA	NA	0.101359	1:1:1:1:1:1	0.305882(0.359626:0.293583:0.264439)	NA	NA	NA	NA
ycf2NL-ycf2XS	NG	0.0110082	0.0166632	0.660632	0.0803165	6840	1486.7	5353.3	NA	83	24.5	58.5	NA	NA	0.0122374	1:1:1:1:1:1	0.378728(0.418202:0.344518:0.373465)	NA	NA	NA	NA
ycf3NL-ycf3XS	NG	0.012897	0.124923	0.10324	6.17129e-06	504	112.972	391.028	NA	18	13	5	NA	NA	0.0380076	1:1:1:1:1:1	0.404762(0.479167:0.386905:0.348214)	NA	NA	NA	NA
ycf4NL-ycf4XS	NG	0.0538824	0.0920854	0.585135	0.133365	552	124.053	427.947	NA	33	10.75	22.25	NA	NA	0.0624679	1:1:1:1:1:1	0.375(0.421196:0.391304:0.3125)	NA	NA	NA	NA
