# Supplementary material for: Chloroplast Genome of Rambutan and Comparative Analyses in Sapindaceae
Source: Research Square preprint supplement (doi:10.21203/rs.3.rs-128918/v1), 2020-12-28
Supplement: Supplementary file 2 [file d9f0ec62a513cce78b2d5e8f.xlsx]

## Sheet: Table S1
Table S1. The reference chloroplast genomes used in this study.
Family	Subfamily	Genus	Organism Name	Replicons	Size(Mb)	Size(kb)	GC%	Genes	CDS	tRNA	rRNA	Pseudogene	other RNA	BioProject	Reference
Sapindaceae	Sapindoideae	Dimocarpus	Dimocarpus longan	NC_037447.1/MG214255.1	0.160833	160.833	37.7858	132	87	37	8	0	0	PRJNA453306	Wang, Kangyu , et al. "Characterization of the complete chloroplast genome of longan (Dimocarpus longan Lour.) using illumina paired-end sequencing." Mitochondrial DNA Part B 2.2(2017):904-906.
		Litchi	Litchi chinensis	NC_035238.1/KY635881.1	0.162524	162.524	37.7993	132	87	37	8	0	0	PRJNA394402	Unpublished
		Pometia	Pometia tomentosa	NC_048999.1/MN106254.1	0.160818	160.818	37.8745	133	88	37	8	0	0	PRJNA642593	Wang, Yi , X. Yuan , and J. Zhang . "The complete chloroplast genome sequence of Pometia tomentosa." (2019).
		Sapindus	Sapindus mukorossi	NC_025554.1/KM454982.1	0.160481	160.481	37.6618	135	88	39	8	0	0	PRJNA267368	Yang B, Li M, Ma J, et al. The complete chloroplast genome sequence of Sapindus mukorossi. Mitochondrial DNA A DNA Mapp Seq Anal. 2016;27(3):1825-1826. doi:10.3109/19401736.2014.971243
	Dodonaeoideae	Dodonaea	Dodonaea viscosa	NC_036099.1/MF155892.1	0.159375	159.375	37.8604	135	88	37	8	2	0	PRJNA414858	Saina J K , Gichira A W , Li Z Z , et al. The complete chloroplast genome sequence of Dodonaea viscosa: comparative and phylogenetic analyses[J]. Genetica, 2017.
		Eurycorymbus	Eurycorymbus cavaleriei	NC_037443.1/MG813997.1	0.158777	158.777	37.9161	137	89	40	8	0	0	PRJNA453214	Du X , Xin G , Ren X , et al. The complete chloroplast genome of Eurycorymbus cavaleriei (Sapindaceae), a Tertiary relic species endemic to China[J]. Conservation Genetics Resources, 2018.
		Koelreuteria	Koelreuteria paniculata	NC_037176.1/KY859413.1	0.163258	163.258	37.298	133	85	37	8	3	0	PRJNA439073	Kim S C , Baek S H , Hong K N , et al. Characterization of the complete chloroplast genome of Koelreuteria paniculata (Sapindaceae)[J]. Conservation Genetics Resources, 2017, 10(4):69-72.
		Xanthoceras	Xanthoceras sorbifolium	NC_037448.1/KY779850.1	0.161231	161.231	37.6931	132	86	38	8	0	0	PRJNA453224	Chen S Y, Zhang X Z. Characterization of the complete chloroplast genome of Xanthoceras sorbifolium, an endangered oil tree[J]. Conservation Genetics Resources, 2017, 9(4): 595-598.
Anacardiaceae		Anacardium	Anacardium occidentale	NC_035235.1/KY635877.1	0.172199	172.199	38.1152	129	84	37	8	0	0	PRJNA394439
		Mangifera	Mangifera indica	NC_035239.1/KY635882.1	0.15778	157.78	37.892	128	83	37	8	0	0	PRJNA394488

## Sheet: Table S2
Table S2 Gene composition in N. lappaceum chloroplast genome.
Category of genes	Group of genes	Name of genes	Number
Genes for photosynthesis	Subunits of ATP synthase	atpA, atpB, atpE, atpFa, atpH, atpI	6
	Subunits of photosystem II	psbA, psbB, psbC, psbD, psbE, psbF, psbH, psbI, psbJ, psbK, psbL, psbM, psbN, psbT, psbZ, ycf3a	16
	Subunits of NADH-dehydrogenase	ndhAa, ndhB*,a, ndhC, ndhD, ndhE, ndhF, ndhG, ndhH, ndhI, ndhJ, ndhK	12
	Subunits of cytochrome b/f complex	petA, petBa, petDa, petG, petL, petN	6
	Subunits of photosystem I	psaA, psaB, psaC, psaI, psaJ	5
	Subunit of rubisco	rbcL	1
Self-replication	Small subunit of ribosome (SSU)	rps11, rps12*, rps14, rps15, rps16a, rps18, rps19*, rps2, rps3*, rps4, rps7*, rps8	16
	Large subunit of ribosome (LSU)	rpl14, rpl16a, rpl2*,a, rpl20, rpl22*, rpl23*, rpl32 , rpl33, rpl36	12
	DNA dependent RNA polymerase	rpoA, rpoB, rpoC1a, rpoC2	4
	Ribosomal RNA genes (rRNA)	rrn16S*, rrn23S*, rrn5S*, rrn4.5S*	8
	Transfer RNA genes (tRNA)	trnA-UGC*,a, trnC-GCA, trnD-GUC, trnE-UUC, trnF-GAA, trnG-GCC, trnG-UCCa, trnH-GUG, trnI-CAU*, trnI-GAU*,a, trnK-UUUa, trnL-CAA*, trnL-UAAa, trnL-UAG, trnM-CAU*, trnN-GUU*, trnP-UGG, trnQ-UUG, trnR-ACG*, trnR-UCU, trnS-GCU, trnS-GGA, trnS-UGA, trnT-GGU, trnT-UGU, trnV-GAC*, trnV-UACa, trnW-CCA, trnY-GUA	37
Other genes	Subunit of Acetyl-CoA-carboxylase	accD	1
	c-type cytochrom synthesis gene	ccsA	1
	Envelop membrane protein	cemA	1
	Protease	clpPa	1
	Maturase	matK	1
Unkown	Conserved open reading frames	ycf1, ycf2*, ycf4	4
Total			132
Note: a Genes containing introns. * duplicated gene (genes present in the inverted repeat (IR) regions).

## Sheet: Table S3
Table S3 The introns and exons length of intron-containing genes in N. lappaceum chloroplast genome.
Gene	Strand	Start	End	Location	ExonⅠ	IntronⅠ	ExonⅡ	IntronⅡ	ExonⅢ
ndhA	-	124590	126774	SSC	553	1093	539
atpF	-	12066	13395	LSC	145	775	410
clpP	-	72988	75130	LSC	71	888	294	664	226
petB	+	78065	79514	LSC	6	802	642
petD	+	79756	81011	LSC	8	773	475
rpl16	-	84500	85962	LSC	9	1055	399
rpoC1	-	21485	24240	LSC	432	713	1611
rps16	-	5142	6253	LSC	40	845	227
trnG-UCC	+	9180	9983	LSC	23	730	49
trnK-UUU	-	1818	4387	LSC	37	2498	35
trnL-UAA	+	49807	50428	LSC	35	537	50
trnV-UAC	-	54238	54916	LSC	39	605	35
ycf3	-	45162	47150	LSC	124	736	230	746	153
ndhB	-	98340	100535	IR	775	672	749
ndhB	+	146856	149051	IR	775	672	749
rpl2	-	87665	89152	IR	391	663	434
rpl2	+	158239	159726	IR	391	663	434
trnA-UGC	+	107153	108065	IR	38	840	35
trnA-UGC	-	139326	140238	IR	38	840	35
trnI-GAU	+	106060	107088	IR	37	957	35
trnI-GAU	-	140303	141331	IR	37	957	35

## Sheet: Table S4
Table S4 Total number of perfect simple sequence repeats (SSRs) identified within the chloroplast genome of Nephelium lappaceum L.
Repeats	3	4	5	6	7	8	9	10	11	12	13	14	15	total
A/T	-	-	-	-	-	-	-	20	14	4	3	1	1	43
C/G	-	-	-	-	-	-	-	1	1					2
AT/AT	-	-	2		1									3
AAG/CTT	-	2												2
AAT/ATT	-	5												5
ATC/ATG	-	1												1
AATC/ATTG	2													2
AATT/AATT			1											1
ACAT/ATGT	1													1
AGAT/ATCT	1													1
AAAGG/CCTTT	2													2

## Sheet: Table S5
Table S5 The distribution pattern and number of simple sequence repeats (SSRs) identified within the chloroplast genome of Sapindaceae.
Nephelium lappaceum L				Dimocarpus longan				Litchi chinensis				Pometia tomentosa				Sapindus mukorossi				Dodonaea viscosa				Eurycorymbus cavaleriei				Koelreuteria paniculata				Xanthoceras sorbifolium
SSR	size	start	end	SSR	size	start	end	SSR	size	start	end	SSR	size	start	end	SSR	size	start	end	SSR	size	start	end	SSR	size	start	end	SSR	size	start	end	SSR	size	start	end
(ATA)4	12	306	317	(ATA)4	12	306	317	(ATA)4	12	266	277	(ATA)4	12	266	277	(T)11	11	2287	2297	(A)12	12	4534	4545	(ATA)4	12	350	361	(T)10	10	4808	4817	(A)11	11	4157	4167
(TCAA)3	12	4760	4771	(TCAA)3	12	4778	4789	(CAG)4	12	1046	1057	(CAG)4	12	1046	1057	(A)10	10	4718	4727	(A)13	13	4723	4735	(TCAA)3	12	5018	5029	(T)10	10	4832	4841	(A)11	11	6084	6094
(A)10	10	6627	6636	(AT)5	10	7274	7283	(TCAA)3	12	4731	4742	(TCAA)3	12	4733	4744	(TCAA)4	16	4788	4803	(A)10	10	4850	4859	(T)11	11	5891	5901	(TCAA)3	12	5067	5078	(A)10	10	6096	6105
(T)11	11	12022	12032	(T)11	11	8831	8841	(A)11	11	6596	6606	(A)10	10	6593	6602	(A)11	11	5525	5535	(A)10	10	5730	5739	(AATA)3	12	6707	6718	(AGAT)3	12	7020	7031	(CTTT)3	12	6822	6833
(T)10	10	13520	13529	(T)14	14	8978	8991	(A)13	13	8631	8643	(T)10	10	8917	8926	(A)13	13	6619	6631	(AGAT)3	12	6754	6765	(ATAA)3	12	6728	6739	(T)10	10	7042	7051	(A)15	15	7337	7351
(T)10	10	13554	13563	(TTTAT)3	15	10111	10125	(TTTAT)3	15	10067	10081	(T)10	10	9041	9050	(A)12	12	6639	6650	(AAG)4	12	8788	8799	(A)11	11	7045	7055	(A)10	10	7252	7261	(A)10	10	7666	7675
(T)10	10	16941	16950	(TTAT)3	12	10422	10433	(TTAT)3	12	10352	10363	(TTAT)3	12	10354	10365	(C)10	10	8189	8198	(T)10	10	9798	9807	(GATA)3	12	7362	7373	(A)11	11	7795	7805	(AT)5	10	9485	9494
(A)10	10	16952	16961	(T)10	10	12619	12628	(A)10	10	12851	12860	(T)13	13	13440	13452	(A)11	11	8199	8209	(TTTA)3	12	9805	9816	(T)10	10	9763	9772	(A)10	10	9316	9325	(TA)5	10	9500	9509
(T)10	10	19058	19067	(T)10	10	13506	13515	(T)11	11	13430	13440	(T)10	10	13476	13485	(A)12	12	8627	8638	(T)12	12	11195	11206	(TTTA)3	12	9770	9781	(T)12	12	9469	9480	(T)10	10	11246	11255
(T)11	11	19165	19175	(T)11	11	13546	13556	(T)10	10	13464	13473	(T)10	10	16867	16876	(T)10	10	12567	12576	(A)10	10	12934	12943	(AT)6	12	11198	11209	(TTTA)3	12	9772	9783	(A)10	10	12638	12647
(TA)5	10	20543	20552	(T)10	10	14889	14898	(T)11	11	16850	16860	(A)11	11	16878	16888	(TATT)3	12	13448	13459	(TTA)4	12	15337	15348	(T)10	10	11350	11359	(T)10	10	9918	9927	(T)10	10	12800	12809
(T)10	10	23591	23600	(A)11	11	16950	16960	(A)14	14	16862	16875	(T)10	10	18985	18994	(T)16	16	13479	13494	(T)18	18	15441	15458	(T)14	14	14355	14368	(ATTTT)3	15	11029	11043	(ATT)4	12	13003	13014
(T)10	10	26834	26843	(T)10	10	19057	19066	(T)10	10	18972	18981	(T)11	11	19092	19102	(T)10	10	13518	13527	(T)10	10	17506	17515	(TTA)4	12	15385	15396	(TTAT)3	12	11416	11427	(T)11	11	13614	13624
(T)11	11	28271	28281	(T)11	11	19164	19174	(T)11	11	19079	19089	(TA)5	10	20470	20479	(T)12	12	14661	14672	(CTT)4	12	18099	18110	(TTC)4	12	18113	18124	(A)12	12	13934	13945	(T)10	10	14154	14163
(ATAG)3	12	33472	33483	(TA)5	10	20542	20551	(TA)5	10	20457	20466	(T)10	10	26760	26769	(T)12	12	14921	14932	(T)10	10	19666	19675	(T)10	10	19676	19685	(TATT)3	12	14510	14521	(T)10	10	18223	18232
(G)11	11	36702	36712	(T)11	11	23590	23600	(T)11	11	23505	23515	(A)10	10	31689	31698	(T)11	11	16993	17003	(T)11	11	19773	19783	(T)11	11	19783	19793	(TAA)4	12	15220	15231	(T)11	11	18330	18340
(TAAT)5	20	38772	38791	(T)10	10	26837	26846	(T)10	10	26749	26758	(T)10	10	31897	31906	(A)10	10	17005	17014	(TA)5	10	21145	21154	(TA)5	10	21155	21164	(A)12	12	17885	17896	(TA)5	10	19708	19717
(TA)5	10	48620	48629	(T)12	12	30862	30873	(T)10	10	30749	30758	(ATAG)3	12	33396	33407	(T)10	10	19114	19123	(C)10	10	23729	23738	(T)10	10	24229	24238	(T)11	11	20118	20128	(T)10	10	25987	25996
(A)10	10	49414	49423	(A)10	10	32992	33001	(A)10	10	31688	31697	(G)11	11	36612	36622	(T)11	11	19221	19231	(T)10	10	27448	27457	(T)10	10	27472	27481	(TA)5	10	21496	21505	(A)11	11	30942	30952
(A)10	10	50181	50190	(ATAG)3	12	33516	33527	(T)13	13	31898	31910	(TAAT)4	16	38679	38694	(TA)5	10	20599	20608	(T)14	14	28632	28645	(T)11	11	30946	30956	(T)10	10	27792	27801	(T)11	11	32877	32887
(ATAC)3	12	50945	50956	(G)11	11	36725	36735	(TTCTT)3	15	32940	32954	(T)12	12	39080	39091	(T)10	10	26891	26900	(AG)5	10	30016	30025	(ATAG)3	12	33431	33442	(T)14	14	28933	28946	(TCTA)3	12	33442	33453
(C)10	10	50988	50997	(T)10	10	38218	38227	(AT)5	10	33399	33408	(A)11	11	47219	47229	(T)10	10	28229	28238	(TA)6	12	30258	30269	(TTGGCC)3	18	33567	33584	(T)11	11	30515	30525	(A)10	10	44099	44108
(T)13	13	51486	51498	(TAAT)3	12	38733	38744	(ATAG)3	12	33415	33426	(TA)5	10	48482	48491	(T)13	13	30523	30535	(AT)5	10	31062	31071	(TCTA)3	12	34229	34240	(ATAG)3	12	34619	34630	(ATTAA)3	15	44503	44517
(ATA)4	12	51545	51556	(A)10	10	38801	38810	(G)11	11	36544	36554	(ATAC)3	12	50842	50853	(A)11	11	31251	31261	(T)10	10	31812	31821	(TAGA)3	12	34246	34257	(G)10	10	37990	37999	(TA)5	10	48143	48152
(A)10	10	53653	53662	(T)10	10	39122	39131	(TAAT)4	16	38626	38641	(T)10	10	50891	50900	(T)10	10	34106	34115	(T)10	10	32369	32378	(A)10	10	34505	34514	(A)11	11	39842	39852	(ATTA)3	12	48964	48975
(ATA)4	12	57339	57350	(A)10	10	47239	47248	(T)10	10	39025	39034	(T)10	10	51383	51392	(AGAGA)3	15	34201	34215	(T)12	12	33552	33563	(G)11	11	36668	36678	(AAT)5	15	40331	40345	(A)11	11	49072	49082
(T)11	11	57367	57377	(TA)5	10	48500	48509	(A)10	10	47160	47169	(ATA)4	12	51439	51450	(G)11	11	36100	36110	(ATAG)3	12	33877	33888	(ATA)5	15	38652	38666	(TAAA)4	16	40391	40406	(T)11	11	50346	50356
(A)10	10	62476	62485	(ATAC)3	12	50867	50878	(TA)5	10	48429	48438	(ATA)4	12	57154	57165	(AATT)3	12	38132	38143	(T)12	12	34006	34017	(TAA)4	12	45335	45346	(TAAA)3	12	40448	40459	(ATAC)3	12	50565	50576
(T)11	11	62522	62532	(T)13	13	51417	51429	(A)10	10	50025	50034	(T)10	10	57183	57192	(T)10	10	38574	38583	(TCTA)3	12	34656	34667	(TCTA)3	12	49517	49528	(TAAA)3	12	40470	40481	(T)12	12	50615	50626
(T)10	10	63627	63636	(ATA)4	12	51476	51487	(ATAC)3	12	50790	50801	(A)10	10	62248	62257	(A)10	10	44462	44471	(TAGA)3	12	34673	34684	(AT)5	10	49722	49731	(ATAA)4	16	40482	40497	(G)10	10	50837	50846
(A)10	10	67114	67123	(T)10	10	54266	54275	(C)10	10	50833	50842	(T)11	11	63396	63406	(TATCCT)3	18	44805	44822	(T)10	10	38072	38081	(T)10	10	50958	50967	(AATA)3	12	40498	40509	(ATA)4	12	51128	51139
(ATT)4	12	67777	67788	(ATA)4	12	57147	57158	(T)12	12	50843	50854	(TC)5	10	63871	63880	(T)10	10	46653	46662	(A)11	11	38994	39004	(ATA)4	12	51434	51445	(AAAT)3	12	40510	40521	(T)10	10	52544	52553
(T)11	11	68357	68367	(T)12	12	57175	57186	(ATA)4	12	57085	57096	(A)11	11	66235	66245	(T)31	31	46664	46694	(AAT)4	12	39003	39014	(T)10	10	52858	52867	(C)10	10	45636	45645	(GATGG)3	15	54726	54740
(A)14	14	68370	68383	(A)10	10	62260	62269	(A)10	10	62205	62214	(A)10	10	66877	66886	(A)10	10	46765	46774	(TAA)4	12	45867	45878	(T)10	10	57232	57241	(A)11	11	46753	46763	(T)10	10	56923	56932
(TA)7	14	69475	69488	(A)11	11	62640	62650	(T)10	10	62251	62260	(A)12	12	68060	68071	(TTATT)3	15	47907	47921	(TAA)5	15	45881	45895	(T)10	10	61693	61702	(T)10	10	49537	49546	(ATA)4	12	56977	56988
(T)12	12	73537	73548	(T)11	11	63420	63430	(T)11	11	63371	63381	(T)10	10	68103	68112	(A)11	11	49797	49807	(AT)5	10	50347	50356	(A)10	10	62355	62364	(TA)5	10	50819	50828	(C)11	11	57404	57414
(T)15	15	74579	74593	(TC)5	10	63895	63904	(TC)5	10	63845	63854	(A)11	11	68115	68125	(T)12	12	50628	50639	(T)13	13	51890	51902	(A)10	10	62739	62748	(TTTTG)3	15	51346	51360	(TAGT)3	12	61324	61335
(A)11	11	81179	81189	(A)12	12	66263	66274	(T)10	10	66171	66180	(T)10	10	68955	68964	(T)12	12	51138	51149	(ATA)4	12	51932	51943	(A)10	10	63984	63993	(TATTA)3	15	51688	51702	(T)10	10	63108	63117
(T)12	12	83391	83402	(A)10	10	66899	66908	(A)11	11	66211	66221	(TA)8	16	69200	69215	(T)10	10	51798	51807	(T)11	11	53348	53358	(A)10	10	67089	67098	(A)13	13	51809	51821	(TA)5	10	65546	65555
(A)12	12	84426	84437	(ATT)4	12	67563	67574	(A)10	10	66852	66861	(A)11	11	70100	70110	(T)11	11	53545	53555	(A)11	11	53938	53948	(T)10	10	68349	68358	(AT)6	12	52005	52016	(TTC)4	12	66423	66434
(AAG)4	12	97199	97210	(A)14	14	68076	68089	(ATT)4	12	67515	67526	(T)10	10	70725	70734	(A)10	10	53738	53747	(T)10	10	54022	54031	(A)10	10	68360	68369	(T)14	14	52431	52444	(TA)5	10	68928	68937
(TTTCC)3	15	106632	106646	(T)10	10	68121	68130	(A)15	15	68034	68048	(A)10	10	71184	71193	(ATA)4	12	57116	57127	(T)10	10	57595	57604	(TA)11	22	69438	69459	(ATAC)3	12	53321	53332	(T)10	10	70405	70414
(T)10	10	112113	112122	(TA)6	12	69219	69230	(T)10	10	68080	68089	(T)10	10	73254	73263	(T)13	13	61834	61846	(TAGT)3	12	61994	62005	(T)10	10	72945	72954	(ATTT)3	12	53891	53902	(A)10	10	73142	73151
(A)13	13	113907	113919	(T)10	10	70011	70020	(A)10	10	68092	68101	(T)11	11	73303	73313	(A)10	10	62222	62231	(AGA)4	12	62415	62426	(T)10	10	73512	73521	(T)10	10	55419	55428	(T)10	10	77478	77487
(T)11	11	114530	114540	(A)12	12	71212	71223	(T)10	10	68932	68941	(T)10	10	74279	74288	(GCAAA)4	20	63315	63334	(A)13	13	62448	62460	(T)10	10	77937	77946	(ACAA)4	16	56067	56082	(A)10	10	80525	80534
(A)11	11	117402	117412	(ATAGG)3	15	72213	72227	(TA)8	16	69178	69193	(A)10	10	74413	74422	(T)10	10	63384	63393	(A)10	10	62792	62801	(T)10	10	81019	81028	(ATA)4	12	60055	60066	(T)18	18	82611	82628
(TTA)4	12	117600	117611	(T)10	10	73119	73128	(T)10	10	69985	69994	(T)10	10	76918	76927	(T)10	10	66162	66171	(A)10	10	63176	63185	(AAG)4	12	96906	96917	(TTATT)3	15	62674	62688	(T)10	10	83112	83121
(A)10	10	117732	117741	(T)11	11	73290	73300	(T)10	10	70727	70736	(T)11	11	80819	80829	(A)10	10	66852	66861	(TC)5	10	64375	64384	(G)10	10	97176	97185	(A)10	10	65175	65184	(A)10	10	83642	83651
(A)11	11	118138	118148	(A)10	10	73994	74003	(T)11	11	71873	71883	(T)11	11	83050	83060	(ATT)4	12	67505	67516	(A)10	10	67379	67388	(A)13	13	113601	113613	(A)10	10	65561	65570	(T)10	10	86833	86842
(T)11	11	118156	118166	(T)13	13	74316	74328	(ATAGG)3	15	72188	72202	(T)10	10	83566	83575	(T)11	11	67684	67694	(T)10	10	68563	68572	(ATT)5	15	113904	113918	(TC)5	10	66870	66879	(CTT)4	12	93154	93165
(A)10	10	118797	118806	(A)14	14	74453	74466	(T)13	13	73265	73277	(A)16	16	84086	84101	(AAAT)3	12	68045	68056	(T)10	10	73112	73121	(A)12	12	116601	116612	(ATAAG)3	15	69047	69061	(AAG)4	12	96562	96573
(T)11	11	121179	121189	(T)10	10	76953	76962	(T)10	10	76931	76940	(AAG)4	12	96861	96872	(T)11	11	68117	68127	(T)10	10	73585	73594	(T)10	10	119403	119412	(A)11	11	69309	69319	(A)10	10	105866	105875
(TTGA)3	12	122730	122741	(T)11	11	83063	83073	(T)13	13	80894	80906	(TTTCC)3	15	106295	106309	(A)10	10	68130	68139	(T)10	10	73675	73684	(AT)6	12	124906	124917	(A)10	10	69971	69980	(TAAAG)3	15	107643	107657
(CAT)4	12	125464	125475	(A)12	12	84097	84108	(A)10	10	80918	80927	(A)13	13	113562	113574	(TA)5	10	69250	69259	(T)11	11	73724	73734	(T)11	11	127308	127318	(TTC)4	12	70526	70537	(A)11	11	111074	111084
(T)10	10	126083	126092	(AAG)4	12	96879	96890	(T)10	10	83121	83130	(A)11	11	114080	114090	(T)10	10	70039	70048	(A)10	10	75614	75623	(A)10	10	127603	127612	(ATT)4	12	70623	70634	(T)10	10	111479	111488
(T)11	11	128298	128308	(TTTCC)3	15	106303	106317	(A)17	17	84155	84171	(T)11	11	116322	116332	(T)10	10	70770	70779	(T)10	10	78119	78128	(T)10	10	129738	129747	(TA)7	14	72406	72419	(A)13	13	113327	113339
(T)12	12	131071	131082	(T)10	10	111770	111779	(AAG)4	12	96927	96938	(T)10	10	116334	116343	(T)14	14	70781	70794	(A)11	11	81247	81257	(A)10	10	129913	129922	(T)10	10	73977	73986	(AAT)4	12	116180	116191
(T)10	10	131552	131561	(A)13	13	113564	113576	(TTTCC)3	15	106360	106374	(TTA)4	12	117028	117039	(T)10	10	73348	73357	(T)11	11	83949	83959	(T)13	13	130546	130558	(T)10	10	77965	77974	(A)10	10	116372	116381
(A)11	11	132851	132861	(A)10	10	114128	114137	(A)13	13	113621	113633	(A)11	11	117160	117170	(T)11	11	73397	73407	(A)14	14	84493	84506	(A)12	12	131706	131717	(CTTT)3	12	81680	81691	(A)12	12	116934	116945
(T)13	13	133472	133484	(T)11	11	116376	116386	(T)11	11	114244	114254	(T)10	10	117618	117627	(A)10	10	74050	74059	(TTCT)3	12	85726	85737	(T)13	13	132105	132117	(A)11	11	87443	87453	(TATT)3	12	116959	116970
(A)10	10	135269	135278	(TTA)4	12	117096	117107	(T)13	13	118076	118088	(A)10	10	118259	118268	(T)11	11	74373	74383	(AAG)4	12	97248	97259	(C)10	10	148533	148542	(AAG)4	12	100257	100268	(AAAT)3	12	117335	117346
(GGAAA)3	15	140745	140759	(A)12	12	117228	117239	(TTA)4	12	118784	118795	(T)19	19	120020	120038	(A)10	10	74928	74937	(T)11	11	102651	102661	(CTT)4	12	148801	148812	(TTTCC)3	15	109791	109805	(A)11	11	117584	117594
(CTT)4	12	150181	150192	(T)10	10	118204	118213	(A)12	12	118916	118927	(A)10	10	120187	120196	(T)10	10	76932	76941	(A)13	13	113973	113985					(A)10	10	114802	114811	(T)12	12	117743	117754
				(A)15	15	118264	118278	(T)11	11	119916	119926	(TTGA)3	12	122195	122206	(A)11	11	80843	80853	(A)10	10	117022	117031					(A)13	13	117036	117048	(A)10	10	118802	118811
				(T)11	11	119960	119970	(TTGA)3	12	123900	123911	(CAT)4	12	124928	124939	(T)11	11	83060	83070	(T)11	11	117711	117721					(AAT)4	12	119880	119891	(A)11	11	118930	118940
				(T)16	16	120065	120080	(CAT)4	12	126633	126644	(T)11	11	127748	127758	(A)11	11	84111	84121	(A)10	10	121339	121348					(T)10	10	119895	119904	(A)10	10	125346	125355
				(TTGA)3	12	122244	122255	(T)10	10	126734	126743	(T)10	10	128555	128564	(TTCT)3	12	85285	85296	(AT)5	10	125386	125395					(TTAA)4	16	119909	119924	(T)15	15	125968	125982
				(A)10	10	122717	122726	(T)13	13	127320	127332	(ATATTG)3	18	129996	130013	(A)11	11	85390	85400	(A)11	11	125654	125664					(A)10	10	119988	119997	(T)11	11	127859	127869
				(CAT)4	12	124979	124990	(T)11	11	129485	129495	(T)12	12	130525	130536	(AAG)4	12	96857	96868	(T)16	16	127805	127820					(ATTG)3	12	120417	120428	(T)11	11	128099	128109
				(T)11	11	127804	127814	(T)10	10	130292	130301	(T)10	10	131006	131015	(T)10	10	111786	111795	(A)11	11	128082	128092					(A)10	10	120797	120806	(T)11	11	128895	128905
				(T)10	10	128610	128619	(T)12	12	132256	132267	(A)11	11	132290	132300	(A)15	15	113616	113630	(T)10	10	130210	130219					(A)10	10	122418	122427	(T)14	14	130985	130998
				(T)12	12	130574	130585	(A)11	11	134021	134031	(T)13	13	132911	132923	(ATT)4	12	116627	116638	(ATT)4	12	130253	130264					(T)10	10	123856	123865	(T)10	10	131290	131299
				(T)10	10	131055	131064	(T)13	13	134642	134654	(GGAAA)3	15	140176	140190	(ATAGA)3	15	116752	116766	(T)13	13	131024	131036					(AT)5	10	125364	125373	(T)12	12	131411	131422
				(T)10	10	131538	131547	(GGAAA)3	15	141901	141915	(CTT)4	12	149613	149624	(A)10	10	117141	117150	(T)12	12	131838	131849					(TTGA)3	12	126136	126147	(T)10	10	131824	131833
				(A)11	11	132339	132349	(CTT)4	12	151337	151348					(T)10	10	117126	117135	(T)13	13	132595	132607					(TA)9	18	129133	129150	(T)12	12	132573	132584
				(T)13	13	132966	132978									(A)10	10	117243	117252	(A)11	11	143919	143929					(T)10	10	129151	129160	(T)13	13	133192	133204
				(A)10	10	134763	134772									(T)10	10	117387	117396	(CTT)4	12	149321	149332					(T)10	10	131042	131051	(A)10	10	135043	135052
				(GGAAA)3	15	140225	140239									(A)18	18	117647	117664									(T)11	11	131287	131297	(T)11	11	135447	135457
				(CTT)4	12	149652	149663									(GAAA)3	12	119726	119737									(T)11	11	132099	132109	(ACTTT)3	15	138873	138887
																(TTGA)3	12	121816	121827									(T)11	11	134231	134241	(T)10	10	140656	140665
																(T)11	11	124932	124942									(T)10	10	134539	134548	(CTT)4	12	149958	149969
																(T)10	10	127137	127146									(T)10	10	135025	135034	(AAG)4	12	153366	153377
																(T)11	11	127376	127386									(A)11	11	135838	135848	(A)10	10	159689	159698
																(T)10	10	128207	128216									(T)13	13	136447	136459
																(T)10	10	128805	128814									(T)10	10	138684	138693
																(T)12	12	130156	130167									(GGAAA)3	15	143690	143704
																(T)10	10	130637	130646									(CTT)4	12	153227	153238
																(A)10	10	131235	131244
																(T)14	14	132502	132515
																(A)10	10	134336	134345
																(CTT)4	12	149263	149274

## Sheet: Table S6
Table S6 Long repeat sequences in the N.lappaceum chloroplast genome.
ID	Size1	Repeat Start 1	Typeb	Size2	Repeat	Mismatch	E-value	Gene1	Gene2	Region1	Region2
	(bp)a			(bp)	Start 2	(bp)
1	17	13514	C	17	135263	0	0.426	IGS	IGS	LSC	IRB
2	17	23355	C	17	70583	0	0.426	rpoC1(intron)	IGS	LSC	LSC
3	19	38771	C	19	38773	0	0.0266	IGS	IGS	LSC	LSC
4	19	62140	C	19	73582	0	0.0266	IGS	clpP(intron)	LSC	LSC
5	17	6621	F	17	16946	0	0.426	IGS	IGS	LSC	LSC
6	21	8530	F	21	37794	0	0.00166	IGS	IGS	LSC	LSC
7	19	8812	F	19	135735	0	0.0266	IGS	IGS	LSC	IRB
8	19	9955	F	19	39026	0	0.0266	IGS	IGS	LSC	LSC
9	17	10253	F	17	117707	0	0.426	IGS	IGS	LSC	SSC
10	19	10361	F	19	10404	0	0.0266	IGS	IGS	LSC	LSC
11	17	13512	F	17	83383	0	0.426	IGS	IGS	LSC	LSC
12	20	14066	F	20	91375	0	0.00666	IGS	ycf2(CDS)	LSC	IRA
13	17	32407	F	17	74713	0	0.426	IGS	clpP(intron)	LSC	LSC
14	22	33734	F	22	33755	0	0.000416	IGS	IGS	LSC	LSC
15	17	37883	F	17	118283	0	0.426	IGS	IGS	LSC	SSC
16	35	44445	F	35	44461	0	6.2e-12	IGS	IGS	LSC	LSC
17	19	44445	F	19	44477	0	0.0266	IGS	IGS	LSC	LSC
18	23	44771	F	23	44792	0	0.000104	IGS	IGS	LSC	LSC
19	19	49331	F	19	49350	0	0.0266	IGS	IGS	LSC	LSC
20	18	49939	F	18	118876	0	0.107	IGS	IGS	LSC	SSC
21	18	50176	F	18	118792	0	0.107	IGS	IGS	LSC	SSC
22	18	50180	F	18	117402	0	0.107	IGS	IGS	LSC	SSC
23	19	53915	F	19	53934	0	0.0266	IGS	IGS	LSC	LSC
24	27	54945	F	27	54967	0	4.06e-07	IGS	IGS	LSC	LSC
25	19	54951	F	19	54995	0	0.0266	IGS	IGS	LSC	LSC
26	19	54973	F	19	54995	0	0.0266	IGS	IGS	LSC	LSC
27	23	57695	F	23	57718	0	0.000104	IGS	IGS	LSC	LSC
28	27	61926	F	27	61945	0	4.06e-07	IGS	IGS	LSC	LSC
29	24	68291	F	24	68311	0	2.6e-05	IGS	IGS	LSC	LSC
30	19	79512	F	19	79530	0	0.0266	petB(CDS)	IGS	LSC	LSC
31	20	87790	F	20	159580	0	0.00666	rpl2(CDS)	rpl2(CDS)	IRA	IRB
32	18	94227	F	18	144769	0	0.107	ycf2(CDS)	IGS	IRA	IRB
33	37	94801	F	37	94819	0	3.87e-13	ycf2(CDS)	ycf2(CDS)	IRA	IRA
34	19	94801	F	19	94837	0	0.0266	ycf2(CDS)	ycf2(CDS)	IRA	IRA
35	18	102603	F	18	153145	0	0.107	IGS	ycf2(CDS)	IRA	IRB
36	18	102605	F	18	112045	0	0.107	IGS	IGS	IRA	IRA
37	18	106066	F	18	134771	0	0.107	IGS	IGS	IRA	IRB
38	19	107709	F	19	107747	0	0.0266	IGS	IGS	IRA	IRA
39	18	112323	F	18	112345	0	0.107	IGS	IGS	IRA	IRA
40	18	112601	F	18	141306	0	0.107	IGS	IGS	IRA	IRB
41	20	130160	F	20	130181	0	0.00666	ycf1(CDS)	ycf1(CDS)	SSC	SSC
42	18	135027	F	18	135049	0	0.107	IGS	IGS	IRB	IRB
43	18	135327	F	18	144767	0	0.107	IGS	IGS	IRB	IRB
44	19	139624	F	19	139662	0	0.0266	IGS	IGS	IRB	IRB
45	37	152534	F	37	152552	0	3.87e-13	ycf2(CDS)	ycf2(CDS)	IRB	IRB
46	19	152534	F	19	152570	0	0.0266	ycf2(CDS)	ycf2(CDS)	IRB	IRB
47	18	4419	P	18	126148	0	0.107	IGS	IGS	LSC	SSC
48	17	5045	P	17	5123	0	0.426	IGS	IGS	LSC	LSC
49	18	5071	P	18	81452	0	0.107	IGS	rpoA(CDS)	LSC	LSC
50	30	8524	P	30	47603	0	6.35e-09	IGS	IGS	LSC	LSC
51	19	8812	P	19	111636	0	0.0266	IGS	IGS	LSC	IRA
52	25	10008	P	25	10034	0	6.5e-06	IGS	IGS	LSC	LSC
53	18	13491	P	18	118091	0	0.107	IGS	IGS	LSC	SSC
54	20	14066	P	20	155995	0	0.00666	IGS	ycf2(CDS)	LSC	IRB
55	17	19468	P	17	68702	0	0.426	IGS	IGS	LSC	LSC
56	18	23581	P	18	120499	0	0.107	rpoC1(intron)	IGS	LSC	SSC
57	17	23967	P	17	60912	0	0.426	rpoC1(CDS)	accD(CDS)	LSC	LSC
58	21	37794	P	21	47606	0	0.00166	IGS	IGS	LSC	LSC
59	20	37862	P	20	47545	0	0.00666	IGS	IGS	LSC	LSC
60	17	38668	P	17	118634	0	0.426	IGS	IGS	LSC	SSC
61	18	38771	P	18	38771	0	0.107	IGS	IGS	LSC	LSC
62	20	38772	P	20	38772	0	0.00666	IGS	IGS	LSC	LSC
63	48	49057	P	48	49057	0	9.24e-20	IGS	IGS	LSC	LSC
64	20	66315	P	20	66343	0	0.00666	IGS	IGS	LSC	LSC
65	21	66562	P	21	66610	0	0.00166	IGS	IGS	LSC	LSC
66	24	68356	P	24	68356	0	2.6e-05	IGS	IGS	LSC	LSC
67	20	69471	P	20	69471	0	0.00666	IGS	IGS	LSC	LSC
68	24	77430	P	24	77430	0	2.6e-05	IGS	IGS	LSC	LSC
69	20	87790	P	20	87790	0	0.00666	rpl2(CDS)	rpl2(CDS)	IRA	IRA
70	18	94227	P	18	102603	0	0.107	ycf2(CDS)	IGS	IRA	IRA
71	19	94801	P	19	152534	0	0.0266	ycf2(CDS)	ycf2(CDS)	IRA	IRB
72	37	94801	P	37	152534	0	3.87e-13	ycf2(CDS)	ycf2(CDS)	IRA	IRB
73	37	94819	P	37	152552	0	3.87e-13	ycf2(CDS)	ycf2(CDS)	IRA	IRB
74	19	94837	P	19	152570	0	0.0266	ycf2(CDS)	ycf2(CDS)	IRA	IRB
75	18	102605	P	18	135327	0	0.107	IGS	IGS	IRA	IRB
76	18	106066	P	18	112601	0	0.107	IGS	IGS	IRA	IRA
77	19	107709	P	19	139624	0	0.0266	IGS	IGS	IRA	IRB
78	19	107747	P	19	139662	0	0.0266	IGS	IGS	IRA	IRB
79	18	112045	P	18	144767	0	0.107	IGS	IGS	IRA	IRB
80	18	112323	P	18	135027	0	0.107	IGS	IGS	IRA	IRB
81	18	112345	P	18	135049	0	0.107	IGS	IGS	IRA	IRB
82	18	117399	P	18	128292	0	0.107	IGS	rps15(CDS)	SSC	SSC
83	18	120379	P	18	120407	0	0.107	IGS	IGS	SSC	SSC
84	24	122120	P	24	122146	0	2.6e-05	IGS	IGS	SSC	SSC
85	18	134771	P	18	141306	0	0.107	IGS	IGS	IRB	IRB
86	18	144769	P	18	153145	0	0.107	IGS	ycf2(CDS)	IRB	IRB
87	20	159580	P	20	159580	0	0.00666	rpl2(CDS)	rpl2(CDS)	IRB	IRB
88	19	2020	R	19	2020	0	0.0266	IGS	IGS	LSC	LSC
89	17	13514	R	17	112110	0	0.426	IGS	IGS	LSC	IRA
90	17	32407	R	17	74712	0	0.426	IGS	clpP(intron)	LSC	LSC
91	20	38771	R	20	38771	0	0.00666	IGS	IGS	LSC	LSC
92	18	38774	R	18	38774	0	0.107	IGS	IGS	LSC	LSC
93	20	53141	R	20	53141	0	0.00666	ndhC(CDS)	ndhC(CDS)	LSC	LSC
94	19	60409	R	19	60409	0	0.0266	accD(CDS)	accD(CDS)	LSC	LSC
95	21	68897	R	21	68897	0	0.00166	petL(CDS)	petL(CDS)	LSC	LSC
96	22	74710	R	22	74710	0	0.000416	clpP(intron)	clpP(intron)	LSC	LSC
97	19	119081	R	19	119081	0	0.0266	IGS	IGS	SSC	SSC
98	19	128551	R	19	128551	0	0.0266	IGS	IGS	SSC	SSC
Note: a. Minimum length 10 bp; Maximum length 100 bp. b. F mean forward(direct) match; R mean reverse match; C mean complement match, P mean palindromic match.

## Sheet: Table S7
Table S7 Codon usage for N. lappaceum chloroplast genome. Total 21434 codons, using 53 CDS.
Amino Acid	Codon	Number	RSCU	Amino Acid	Codon	Number	RSCU
Phe	UUU	839	1.34	Ser	UCU	420	1.57
	UUC	414	0.66		UCC	264	0.99
Leu	UUA	710	1.91		UCA	329	1.23
	UUG	457	1.23		UCG	151	0.57
	CUU	465	1.25	Pro	CCU	317	1.45
	CUC	143	0.38		CCC	186	0.85
	CUA	301	0.81		CCA	244	1.11
	CUG	156	0.42		CCG	130	0.59
Ile	AUU	909	1.49	Thr	ACU	414	1.54
	AUC	358	0.59		ACC	212	0.79
	AUA	559	0.92		ACA	320	1.19
Met	AUG	482	1		ACG	127	0.47
Val	GUU	439	1.48	Ala	GCU	519	1.74
	GUC	134	0.45		GCC	193	0.65
	GUA	451	1.52		GCA	330	1.11
	GUG	164	0.55		GCG	152	0.51
Tyr	UAU	641	1.62	Cys	UGU	169	1.43
	UAC	151	0.38		UGC	67	0.57
TER	UAA	33	1.87	TER	UGA	10	0.57
	UAG	10	0.57	Trp	UGG	381	1
His	CAU	381	1.45	Arg	CGU	262	1.23
	CAC	144	0.55		CGC	112	0.53
Gln	CAA	597	1.53		CGA	287	1.35
	CAG	181	0.47		CGG	107	0.5
Asn	AAU	790	1.54	Ser	AGU	327	1.23
	AAC	238	0.46		AGC	109	0.41
Lys	AAA	855	1.51	Arg	AGA	355	1.67
	AAG	276	0.49		AGG	150	0.71
Asp	GAU	676	1.57	Gly	GGU	476	1.26
	GAC	184	0.43		GGC	159	0.42
Glu	GAA	862	1.51		GGA	597	1.58
	GAG	278	0.49		GGG	280	0.74

## Sheet: Table S8
Table S8 RNA editing sites in the Nephelium lappaceum chloroplast genome.
Gene Name	Strand	Region	Nt pos	AA pos	Effect	Score
accD	+	LSC	809	270	TCG (S) => TTG (L)	0.8
accD	+	LSC	1210	404	CCA (P) => TCA (S)	1
atpB	-	LSC	266	89	ACG (T) => ATG (M)	1
atpF	-	LSC	26	9	GCT (A) => GTT (V)	0.86
atpF	-	LSC	32	11	TCG (S) => TTG (L)	0.86
atpF	-	LSC	92	31	CCA (P) => CTA (L)	0.86
ccsA	+	SSC	145	49	CTT (L) => TTT (F)	1
clpP	-	LSC	196	66	CTT (L) => TTT (F)	1
clpP	-	LSC	418	140	CTT (L) => TTT (F)	1
clpP	-	LSC	559	187	CAT (H) => TAT (Y)	1
matK	-	LSC	457	153	CAT (H) => TAT (Y)	1
matK	-	LSC	643	215	CAT (H) => TAT (Y)	1
matK	-	LSC	799	267	CGG (R) => TGG (W)	0.86
matK	-	LSC	1246	416	CAC (H) => TAC (Y)	1
ndhA	-	SSC	341	114	TCA (S) => TTA (L)	1
ndhA	-	SSC	566	189	TCA (S) => TTA (L)	1
ndhA	-	SSC	1073	358	TCC (S) => TTC (F)	1
ndhB	+	IR	149	50	TCA (S) => TTA (L)	1
ndhB	+	IR	467	156	CCA (P) => CTA (L)	1
ndhB	+	IR	586	196	CAT (H) => TAT (Y)	1
ndhB	+	IR	611	204	TCA (S) => TTA (L)	0.8
ndhB	+	IR	746	249	TCT (S) => TTT (F)	1
ndhB	+	IR	836	279	TCA (S) => TTA (L)	1
ndhB	+	IR	1112	371	TCA (S) => TTA (L)	1
ndhB	+	IR	1255	419	CAT (H) => TAT (Y)	1
ndhB	+	IR	1472	491	CCA (P) => CTA (L)	1
ndhD	-	SSC	20	7	ACG (T) => ATG (M)	1
ndhD	-	SSC	401	134	TCA (S) => TTA (L)	1
ndhD	-	SSC	692	231	TCA (S) => TTA (L)	1
ndhD	-	SSC	896	299	TCA (S) => TTA (L)	1
ndhD	-	SSC	1316	439	TCA (S) => TTA (L)	0.8
ndhF	-	SSC	259	87	CAC (H) => TAC (Y)	1
ndhF	-	SSC	290	97	TCA (S) => TTA (L)	1
ndhF	-	SSC	1849	617	CTT (L) => TTT (F)	1
ndhG	-	SSC	320	107	ACA (T) => ATA (I)	0.8
rpl20	-	LSC	308	103	TCA (S) => TTA (L)	0.86
rpoA	-	LSC	830	277	CCA (P) => CTA (L)	1
rpoB	-	LSC	338	113	TCT (S) => TTT (F)	1
rpoB	-	LSC	551	184	TCA (S) => TTA (L)	1
rpoB	-	LSC	566	189	TCG (S) => TTG (L)	1
rpoB	-	LSC	1562	521	TCC (S) => TTC (F)	1
rpoB	-	LSC	2426	809	TCA (S) => TTA (L)	0.86
rpoC1	-	LSC	41	14	TCA (S) => TTA (L)	1
rpoC2	-	LSC	1666	556	CAT (H) => TAT (Y)	0.86
rpoC2	-	LSC	2021	674	ACT (T) => ATT (I)	1
rpoC2	-	LSC	2305	769	CGG (R) => TGG (W)	1
rps14	-	LSC	80	27	CCA (P) => CTA (L)	1
rps14	-	LSC	149	50	CCA (P) => CTA (L)	1
rps16	-	LSC	212	71	TCA (S) => TTA (L)	0.83
